# Supplementary material for: Balancing the Conservation and Poverty Eradication: Differences in the Spatial Distribution Characteristics of Protected Areas between Poor and Non-Poor Counties in China
Source: MDPI journal article supplement (doi:10.3390/su14094984), 2022-04-21
Supplement: s1 [file s1]

**Table S1:** Area coverage of different types of protected areas in poor and non-poor counties in China

| Counties ID | Name               | Poor-county | Area coverage of protected areas (%) | Area coverage of nature reserves (%) | Area coverage of natural parks (%) |
|-------------|--------------------|-------------|--------------------------------------|--------------------------------------|------------------------------------|
| 1           | dong cheng qu      | No          | 0.00                                 | 0.00                                 | 0.00                               |
| 2           | xi cheng qu        | No          | 0.00                                 | 0.00                                 | 0.00                               |
| 3           | chao yang qu       | No          | 3.52                                 | 0.00                                 | 3.52                               |
| 4           | feng tai qu        | No          | 3.06                                 | 0.00                                 | 3.06                               |
| 5           | shi jing shan qu   | No          | 20.19                                | 0.00                                 | 20.19                              |
| 6           | hai dian qu        | No          | 8.22                                 | 0.00                                 | 8.22                               |
| 7           | men tou gou qu     | No          | 21.63                                | 15.46                                | 8.22                               |
| 8           | fang shan qu       | No          | 31.08                                | 5.11                                 | 28.12                              |
| 9           | tong zhou qu       | No          | 0.26                                 | 0.00                                 | 0.26                               |
| 10          | shun yi qu         | No          | 2.51                                 | 1.87                                 | 0.63                               |
| 11          | chang ping qu      | No          | 8.85                                 | 0.00                                 | 8.85                               |
| 12          | da xing qu         | No          | 1.20                                 | 0.00                                 | 1.20                               |
| 13          | huai rou qu        | No          | 23.35                                | 8.84                                 | 14.53                              |
| 14          | ping gu qu         | No          | 22.93                                | 21.26                                | 6.61                               |
| 15          | mi yun xian        | No          | 14.32                                | 4.93                                 | 11.38                              |
| 16          | yan qing xian      | No          | 33.35                                | 26.89                                | 10.00                              |
| 17          | he ping qu         | No          | 0.00                                 | 0.00                                 | 0.00                               |
| 18          | he dong qu         | No          | 54.74                                | 0.00                                 | 54.74                              |
| 19          | he xi qu           | No          | 0.00                                 | 0.00                                 | 0.00                               |
| 20          | nan kai qu         | No          | 0.00                                 | 0.00                                 | 0.00                               |
| 21          | he bei qu          | No          | 0.00                                 | 0.00                                 | 0.00                               |
| 22          | hong qiao qu       | No          | 0.00                                 | 0.00                                 | 0.00                               |
| 23          | dong li qu         | No          | 0.00                                 | 0.00                                 | 0.00                               |
| 24          | xi qing qu         | No          | 2.07                                 | 2.07                                 | 0.00                               |
| 25          | jin nan qu         | No          | 1.97                                 | 1.97                                 | 0.00                               |
| 26          | bei chen qu        | No          | 0.00                                 | 0.00                                 | 0.00                               |
| 27          | wu qing qu         | No          | 6.83                                 | 6.63                                 | 0.20                               |
| 28          | bao di qu          | No          | 4.85                                 | 1.13                                 | 3.72                               |
| 29          | bin hai xin qu     | No          | 14.15                                | 14.15                                | 0.00                               |
| 30          | ning he xian       | No          | 24.90                                | 24.90                                | 0.00                               |
| 31          | jing hai xian      | No          | 3.43                                 | 3.43                                 | 0.00                               |
| 32          | ji xian            | No          | 17.04                                | 1.60                                 | 17.02                              |
| 33          | zhang an qu        | No          | 100.00                               | 54.25                                | 100.00                             |
| 34          | qiao dong qu       | No          | 2.56                                 | 0.00                                 | 2.56                               |
| 35          | qiao xi qu         | No          | 9.89                                 | 0.00                                 | 9.89                               |
| 36          | xin hua qu         | No          | 66.29                                | 57.91                                | 8.39                               |
| 37          | jing xing kuang qu | No          | 0.57                                 | 0.00                                 | 0.57                               |
| 38          | yu hua qu          | No          | 0.00                                 | 0.00                                 | 0.00                               |
| 39          | jing xing xian     | No          | 4.69                                 | 2.19                                 | 3.89                               |
| 40          | zheng ding xian    | No          | 0.00                                 | 0.00                                 | 0.00                               |
| 41          | luan cheng xian    | No          | 0.00                                 | 0.00                                 | 0.00                               |
| 42          | gao yi xian        | No          | 0.00                                 | 0.00                                 | 0.00                               |
| 43          | shen ze xian       | No          | 0.00                                 | 0.00                                 | 0.00                               |
| 44          | wu ji xian         | No          | 0.00                                 | 0.00                                 | 0.00                               |
| 45          | yuan shi xian      | No          | 1.36                                 | 0.03                                 | 1.34                               |
| 46          | zhao xian          | No          | 0.00                                 | 0.00                                 | 0.00                               |
| 47          | xin ji shi         | No          | 0.00                                 | 0.00                                 | 0.00                               |
| 48          | gao cheng shi      | No          | 0.00                                 | 0.00                                 | 0.00                               |
| 49          | jin zhou shi       | No          | 0.00                                 | 0.00                                 | 0.00                               |
| 50          | xin le shi         | No          | 1.49                                 | 0.00                                 | 1.49                               |
| 51          | lu quan shi        | No          | 1.04                                 | 0.00                                 | 1.04                               |
| 52          | lu nan qu          | No          | 0.00                                 | 0.00                                 | 0.00                               |
| 53          | lu bei qu          | No          | 0.00                                 | 0.00                                 | 0.00                               |
| 54          | gu ye qu           | No          | 0.00                                 | 0.00                                 | 0.00                               |
| 55          | kai ping qu        | No          | 0.00                                 | 0.00                                 | 0.00                               |
| 56          | feng nan qu        | No          | 0.00                                 | 0.00                                 | 0.00                               |
| 57          | feng run qu        | No          | 0.37                                 | 0.00                                 | 0.37                               |
| 58          | luan xian          | No          | 0.00                                 | 0.00                                 | 0.00                               |
| 59          | luan nan xian      | No          | 0.00                                 | 0.00                                 | 0.00                               |
| 60          | le ting xian       | No          | 3.90                                 | 2.65                                 | 1.71                               |
| 61          | qian xi xian       | No          | 2.75                                 | 0.04                                 | 2.71                               |
| 62          | yu tian xian       | No          | 0.00                                 | 0.00                                 | 0.00                               |
| 63          | tang hai xian      | No          | 12.02                                | 12.02                                | 0.00                               |
| 64          | zun hua shi        | No          | 3.58                                 | 0.00                                 | 3.58                               |
| 65          | qian an shi        | No          | 2.09                                 | 0.00                                 | 2.09                               |
| 66          | hai gang qu        | No          | 3.72                                 | 0.00                                 | 3.72                               |
| 67          | shan hai guan qu   | No          | 16.07                                | 0.00                                 | 16.07                              |
| 68          | bei dai he qu      | No          | 43.90                                | 0.00                                 | 43.90                              |
| 69          | chang li xian      | No          | 14.28                                | 12.15                                | 7.46                               |
| 70          | fu ning xian       | No          | 3.16                                 | 0.88                                 | 3.03                               |
| 71          | lu long xian       | No          | 0.83                                 | 0.00                                 | 0.83                               |
| 72          | han shan qu        | No          | 0.00                                 | 0.00                                 | 0.00                               |
| 73          | cong tai qu        | No          | 0.00                                 | 0.00                                 | 0.00                               |
| 74          | fu xing qu         | No          | 0.00                                 | 0.00                                 | 0.00                               |
| 75          | feng feng kuang qu | No          | 18.12                                | 0.00                                 | 18.12                              |
| 76          | han dan xian       | No          | 0.64                                 | 0.00                                 | 0.64                               |
| 77          | lin zhang xian     | No          | 0.00                                 | 0.00                                 | 0.00                               |
| 78          | cheng an xian      | No          | 0.00                                 | 0.00                                 | 0.00                               |
| 79          | she xian           | No          | 4.32                                 | 0.00                                 | 4.32                               |
| 80          | ci xian            | No          | 2.35                                 | 0.00                                 | 2.35                               |
| 81          | fei xiang xian     | No          | 0.00                                 | 0.00                                 | 0.00                               |
| 82          | yong nian xian     | No          | 1.22                                 | 0.00                                 | 1.22                               |
| 83          | qiu xian           | No          | 0.00                                 | 0.00                                 | 0.00                               |
| 84          | ji ze xian         | No          | 0.00                                 | 0.00                                 | 0.00                               |
| 85          | guang ping xian    | No          | 0.00                                 | 0.00                                 | 0.00                               |
| 86          | guan tao xian      | No          | 0.00                                 | 0.00                                 | 0.00                               |
| 87          | qu zhou xian       | No          | 0.00                                 | 0.00                                 | 0.00                               |
| 88          | wu an shi          | No          | 22.53                                | 8.29                                 | 22.40                              |
| 89          | qiao dong qu       | No          | 3.03                                 | 0.00                                 | 3.03                               |
| 90          | qiao xi qu         | No          | 5.96                                 | 0.00                                 | 5.96                               |
| 91          | xing tai xian      | No          | 5.18                                 | 0.03                                 | 5.18                               |
| 92          | nei qiu xian       | No          | 1.24                                 | 0.63                                 | 0.72                               |
| 93          | bai xiang xian     | No          | 0.00                                 | 0.00                                 | 0.00                               |
| 94          | long yao xian      | No          | 0.00                                 | 0.00                                 | 0.00                               |
| 95          | ren xian           | No          | 2.28                                 | 0.00                                 | 2.28                               |
| 96          | nan he xian        | No          | 0.01                                 | 0.00                                 | 0.01                               |
| 97          | ning jin xian      | No          | 0.00                                 | 0.00                                 | 0.00                               |
| 98          | qing he xian       | No          | 0.10                                 | 0.00                                 | 0.10                               |
| 99          | lin xi xian        | No          | 0.00                                 | 0.00                                 | 0.00                               |
| 100         | nan gong shi       | No          | 0.40                                 | 0.00                                 | 0.40                               |
| 101         | sha he shi         | No          | 1.62                                 | 0.00                                 | 1.62                               |
| 102         | xin shi qu         | No          | 0.00                                 | 0.00                                 | 0.00                               |
| 103         | bei shi qu         | No          | 0.00                                 | 0.00                                 | 0.00                               |
| 104         | nan shi qu         | No          | 0.00                                 | 0.00                                 | 0.00                               |
| 105         | man cheng xian     | No          | 0.00                                 | 0.00                                 | 0.00                               |

|     |                               |    |        |       |        |
|-----|-------------------------------|----|--------|-------|--------|
| 106 | qing yuan xian                | No | 0.31   | 0.00  | 0.31   |
| 107 | xu shui xian                  | No | 0.00   | 0.00  | 0.00   |
| 108 | ding xing xian                | No | 0.00   | 0.00  | 0.00   |
| 109 | gao yang xian                 | No | 1.76   | 1.72  | 0.04   |
| 110 | rong cheng xian               | No | 0.11   | 0.11  | 0.00   |
| 111 | an xin xian                   | No | 37.48  | 37.48 | 0.00   |
| 112 | li xian                       | No | 0.00   | 0.00  | 0.00   |
| 113 | bo ye xian                    | No | 0.01   | 0.00  | 0.01   |
| 114 | xiong xian                    | No | 1.46   | 1.46  | 0.00   |
| 115 | zhuo zhou shi                 | No | 0.03   | 0.00  | 0.03   |
| 116 | ding zhou shi                 | No | 0.00   | 0.00  | 0.00   |
| 117 | an guo shi                    | No | 0.00   | 0.00  | 0.00   |
| 118 | gao bei dian shi              | No | 0.00   | 0.00  | 0.00   |
| 119 | qiao dong qu                  | No | 0.91   | 0.00  | 0.91   |
| 120 | qiao xi qu                    | No | 3.75   | 0.00  | 3.75   |
| 121 | xia hua yuan qu               | No | 8.66   | 3.44  | 5.26   |
| 122 | xuan hua xian                 | No | 6.46   | 4.62  | 1.86   |
| 123 | huai lai xian                 | No | 10.74  | 0.03  | 10.70  |
| 124 | zhuo lu xian                  | No | 7.26   | 5.88  | 7.11   |
| 125 | shuang qiao qu                | No | 16.84  | 0.00  | 16.84  |
| 126 | shuang luan qu                | No | 13.94  | 0.00  | 13.94  |
| 127 | ying shou ying zi kuang qu    | No | 0.55   | 0.00  | 0.55   |
| 128 | xing long xian                | No | 10.60  | 9.44  | 6.32   |
| 129 | kuan cheng man zu zi zhi xian | No | 17.57  | 17.52 | 0.72   |
| 130 | xin hua qu                    | No | 84.91  | 74.17 | 10.75  |
| 131 | yun he qu                     | No | 0.00   | 0.00  | 0.00   |
| 132 | cang xian                     | No | 0.00   | 0.00  | 0.00   |
| 133 | qing xian                     | No | 0.00   | 0.00  | 0.00   |
| 134 | dong guang xian               | No | 0.00   | 0.00  | 0.00   |
| 135 | su ning xian                  | No | 0.00   | 0.00  | 0.00   |
| 136 | wu qiao xian                  | No | 0.00   | 0.00  | 0.00   |
| 137 | xian xian                     | No | 0.00   | 0.00  | 0.00   |
| 138 | meng cun hui zu zi zhi xian   | No | 0.00   | 0.00  | 0.00   |
| 139 | bo tou shi                    | No | 0.00   | 0.00  | 0.00   |
| 140 | ren qiu shi                   | No | 0.30   | 0.30  | 0.01   |
| 141 | huang hua shi                 | No | 3.30   | 3.30  | 0.00   |
| 142 | he jian shi                   | No | 0.00   | 0.00  | 0.00   |
| 143 | an ci qu                      | No | 0.00   | 0.00  | 0.00   |
| 144 | guang yang qu                 | No | 0.02   | 0.00  | 0.02   |
| 145 | gu an xian                    | No | 0.00   | 0.00  | 0.00   |
| 146 | yong qing xian                | No | 0.00   | 0.00  | 0.00   |
| 147 | xiang he xian                 | No | 8.05   | 0.00  | 8.05   |
| 148 | da cheng xian                 | No | 0.00   | 0.00  | 0.00   |
| 149 | wen an xian                   | No | 2.80   | 0.00  | 2.80   |
| 150 | da chang hui zu zi zhi xian   | No | 0.00   | 0.00  | 0.00   |
| 151 | ba zhou shi                   | No | 0.02   | 0.00  | 0.02   |
| 152 | san he shi                    | No | 0.00   | 0.00  | 0.00   |
| 153 | tao cheng qu                  | No | 10.26  | 10.26 | 0.00   |
| 154 | zao qiang xian                | No | 0.00   | 0.00  | 0.00   |
| 155 | an ping xian                  | No | 0.00   | 0.00  | 0.00   |
| 156 | gu cheng xian                 | No | 0.45   | 0.00  | 0.45   |
| 157 | jing xian                     | No | 0.13   | 0.00  | 0.13   |
| 158 | ji zhou shi                   | No | 11.18  | 11.18 | 0.00   |
| 159 | shen zhou shi                 | No | 0.00   | 0.00  | 0.00   |
| 160 | xiao dian qu                  | No | 0.00   | 0.00  | 0.00   |
| 161 | ying ze qu                    | No | 13.04  | 0.00  | 13.04  |
| 162 | xing hua ling qu              | No | 10.09  | 0.00  | 10.09  |
| 163 | jian cao ping qu              | No | 1.12   | 0.00  | 1.12   |
| 164 | wan bai lin qu                | No | 17.68  | 0.00  | 17.68  |
| 165 | jin yuan qu                   | No | 16.16  | 10.01 | 14.59  |
| 166 | qing xu xian                  | No | 3.36   | 0.02  | 3.36   |
| 167 | yang qu xian                  | No | 13.32  | 11.93 | 1.39   |
| 168 | gu jiao shi                   | No | 13.28  | 0.31  | 12.97  |
| 169 | cheng qu                      | No | 100.00 | 27.02 | 93.93  |
| 170 | nan jiao qu                   | No | 15.10  | 0.19  | 14.91  |
| 171 | xin rong qu                   | No | 4.56   | 0.00  | 4.56   |
| 172 | zuo yun xian                  | No | 3.46   | 0.02  | 3.44   |
| 173 | cheng qu                      | No | 100.00 | 64.61 | 100.00 |
| 174 | kuang qu                      | No | 7.34   | 0.00  | 7.34   |
| 175 | jiao qu                       | No | 8.04   | 3.17  | 4.93   |
| 176 | ping ding xian                | No | 8.11   | 7.60  | 0.51   |
| 177 | yu xian                       | No | 1.39   | 0.01  | 1.38   |
| 178 | cheng qu                      | No | 72.88  | 16.43 | 57.13  |
| 179 | jiao qu                       | No | 16.64  | 6.55  | 10.20  |
| 180 | zhang zhi xian                | No | 0.00   | 0.00  | 0.00   |
| 181 | xiang yuan xian               | No | 4.66   | 0.07  | 4.61   |
| 182 | tun liu xian                  | No | 2.72   | 0.00  | 2.72   |
| 183 | li cheng xian                 | No | 31.82  | 29.23 | 5.47   |
| 184 | zhang zi xian                 | No | 0.42   | 0.02  | 0.39   |
| 185 | qin xian                      | No | 12.38  | 11.56 | 1.81   |
| 186 | qin yuan xian                 | No | 8.79   | 6.53  | 4.05   |
| 187 | lu cheng shi                  | No | 1.20   | 0.00  | 1.20   |
| 188 | cheng qu                      | No | 28.40  | 6.40  | 22.26  |
| 189 | qin shui xian                 | No | 4.20   | 1.29  | 4.09   |
| 190 | yang cheng xian               | No | 20.12  | 9.52  | 15.20  |
| 191 | ling chuan xian               | No | 21.67  | 14.10 | 9.86   |
| 192 | ze zhou xian                  | No | 46.35  | 46.02 | 3.11   |
| 193 | gao ping shi                  | No | 6.61   | 0.00  | 6.61   |
| 194 | shuo cheng qu                 | No | 8.27   | 7.41  | 0.89   |
| 195 | ping lu qu                    | No | 0.00   | 0.00  | 0.00   |
| 196 | shan yin xian                 | No | 1.71   | 0.79  | 0.91   |
| 197 | ying xian                     | No | 20.84  | 18.27 | 2.56   |
| 198 | huai ren xian                 | No | 13.17  | 9.22  | 3.95   |
| 199 | yu ci qu                      | No | 13.76  | 11.53 | 2.22   |
| 200 | yu she xian                   | No | 4.60   | 0.03  | 4.57   |
| 201 | xi yang xian                  | No | 1.01   | 0.23  | 0.81   |
| 202 | shou yang xian                | No | 4.37   | 0.00  | 4.37   |
| 203 | tai gu xian                   | No | 0.66   | 0.44  | 0.22   |
| 204 | qi xian                       | No | 19.19  | 18.17 | 1.02   |
| 205 | ping yao xian                 | No | 15.34  | 15.01 | 0.33   |
| 206 | ling shi xian                 | No | 20.50  | 10.63 | 11.39  |
| 207 | jie xiu shi                   | No | 16.03  | 14.07 | 15.66  |
| 208 | yan hu qu                     | No | 6.31   | 6.18  | 0.13   |
| 209 | lin yi xian                   | No | 4.18   | 4.16  | 0.01   |
| 210 | wan rong xian                 | No | 18.05  | 15.49 | 2.55   |
| 211 | wen xi xian                   | No | 0.17   | 0.17  | 0.00   |
| 212 | ji shan xian                  | No | 2.55   | 0.00  | 2.55   |
| 213 | xin jiang xian                | No | 1.53   | 0.00  | 1.53   |
| 214 | jiang xian                    | No | 23.89  | 23.42 | 2.98   |

|     |                                  |    |       |       |       |
|-----|----------------------------------|----|-------|-------|-------|
| 215 | yuan qu xian                     | No | 13.42 | 12.21 | 9.93  |
| 216 | xia xian                         | No | 17.49 | 17.48 | 5.01  |
| 217 | rui cheng xian                   | No | 11.78 | 11.63 | 0.15  |
| 218 | yong ji shi                      | No | 33.91 | 22.19 | 11.72 |
| 219 | he jin shi                       | No | 18.05 | 18.05 | 0.00  |
| 220 | xin fu qu                        | No | 28.38 | 24.54 | 3.84  |
| 221 | ding xiang xian                  | No | 0.04  | 0.00  | 0.04  |
| 222 | yuan ping shi                    | No | 2.37  | 0.06  | 2.31  |
| 223 | yao dou qu                       | No | 2.34  | 0.00  | 2.34  |
| 224 | qu wo xian                       | No | 3.17  | 0.00  | 3.17  |
| 225 | yi cheng xian                    | No | 13.88 | 12.98 | 4.53  |
| 226 | xiang fen xian                   | No | 0.59  | 0.00  | 0.59  |
| 227 | hong dong xian                   | No | 2.95  | 1.11  | 2.90  |
| 228 | gu xian                          | No | 15.48 | 8.39  | 11.43 |
| 229 | an ze xian                       | No | 19.71 | 10.51 | 9.21  |
| 230 | fu shan xian                     | No | 0.00  | 0.00  | 0.00  |
| 231 | xiang ning xian                  | No | 0.00  | 0.00  | 0.00  |
| 232 | pu xian                          | No | 10.57 | 10.57 | 0.00  |
| 233 | hou ma shi                       | No | 4.86  | 0.00  | 4.86  |
| 234 | huo zhou shi                     | No | 29.54 | 10.05 | 28.32 |
| 235 | li shi qu                        | No | 12.20 | 6.85  | 6.48  |
| 236 | wen shui xian                    | No | 13.14 | 0.00  | 13.14 |
| 237 | jiao cheng xian                  | No | 21.20 | 4.21  | 21.13 |
| 238 | liu lin xian                     | No | 0.16  | 0.00  | 0.16  |
| 239 | jiao kou xian                    | No | 0.36  | 0.00  | 0.36  |
| 240 | xiao yi shi                      | No | 0.63  | 0.00  | 0.63  |
| 241 | fen yang shi                     | No | 4.12  | 0.00  | 4.12  |
| 242 | xin cheng qu                     | No | 68.28 | 63.19 | 67.52 |
| 243 | hui min qu                       | No | 67.21 | 66.89 | 64.31 |
| 244 | yu quan qu                       | No | 0.00  | 0.00  | 0.00  |
| 245 | sai han qu                       | No | 3.30  | 3.21  | 0.09  |
| 246 | tu mo te zuo qi                  | No | 42.06 | 42.03 | 8.34  |
| 247 | tuo ke tuo xian                  | No | 0.04  | 0.00  | 0.04  |
| 248 | he lin ge er xian                | No | 3.91  | 3.82  | 0.98  |
| 249 | qing shui he xian                | No | 4.18  | 3.00  | 1.18  |
| 250 | dong he qu                       | No | 5.31  | 5.31  | 0.00  |
| 251 | kun dou lun qu                   | No | 0.00  | 0.00  | 0.00  |
| 252 | qing shan qu                     | No | 0.00  | 0.00  | 0.00  |
| 253 | shi guai qu                      | No | 50.69 | 50.58 | 11.43 |
| 254 | bai yun e bo kuang qu            | No | 0.00  | 0.00  | 0.00  |
| 255 | jiu yuan qu                      | No | 29.01 | 20.70 | 16.43 |
| 256 | tu mo te you qi                  | No | 21.43 | 15.10 | 6.43  |
| 257 | gu yang xian                     | No | 7.67  | 7.67  | 0.00  |
| 258 | da er han mao ming an lian he qi | No | 2.76  | 2.76  | 0.00  |
| 259 | hai bo wan qu                    | No | 20.21 | 15.14 | 5.08  |
| 260 | hai nan qu                       | No | 9.67  | 9.65  | 0.02  |
| 261 | wu da qu                         | No | 0.00  | 0.00  | 0.00  |
| 262 | hong shan qu                     | No | 15.40 | 4.78  | 13.08 |
| 263 | yuan bao shan qu                 | No | 2.43  | 0.36  | 2.07  |
| 264 | song shan qu                     | No | 2.06  | 1.52  | 0.69  |
| 265 | ke shi ke teng qi                | No | 31.07 | 23.86 | 15.06 |
| 266 | ke er qin qu                     | No | 3.60  | 3.53  | 1.14  |
| 267 | kai lu xian                      | No | 4.31  | 4.31  | 0.00  |
| 268 | zha lu te qi                     | No | 14.45 | 14.45 | 5.37  |
| 269 | huo lin guo le shi               | No | 0.63  | 0.00  | 0.63  |
| 270 | dong sheng qu                    | No | 2.41  | 2.35  | 0.06  |
| 271 | da la te qi                      | No | 3.73  | 0.27  | 3.46  |
| 272 | zhun ge er qi                    | No | 0.53  | 0.28  | 0.26  |
| 273 | e tuo ke qian qi                 | No | 6.70  | 6.60  | 0.13  |
| 274 | e tuo ke qi                      | No | 31.10 | 31.10 | 0.18  |
| 275 | hang jin qi                      | No | 8.06  | 6.68  | 1.69  |
| 276 | wu shen qi                       | No | 4.77  | 4.05  | 0.80  |
| 277 | yi jin huo tuo qi                | No | 8.48  | 1.63  | 6.85  |
| 278 | hai la er qu                     | No | 5.12  | 5.12  | 5.12  |
| 279 | a rong qi                        | No | 10.86 | 1.91  | 9.07  |
| 280 | e wen ke zu zi zhi qi            | No | 25.67 | 24.25 | 2.45  |
| 281 | chen ba er hu qi                 | No | 15.50 | 15.41 | 0.49  |
| 282 | xin ba er hu zuo qi              | No | 21.07 | 21.04 | 0.06  |
| 283 | xin ba er hu you qi              | No | 44.29 | 44.18 | 0.37  |
| 284 | man zhou li shi                  | No | 13.55 | 11.21 | 8.06  |
| 285 | ya ke shi shi                    | No | 11.02 | 3.44  | 7.58  |
| 286 | zha lan tun shi                  | No | 6.39  | 3.40  | 3.65  |
| 287 | e er gu na shi                   | No | 35.57 | 34.15 | 5.71  |
| 288 | gen he shi                       | No | 16.08 | 9.76  | 6.31  |
| 289 | lin he qu                        | No | 2.05  | 1.93  | 1.96  |
| 290 | wu yuan xian                     | No | 4.60  | 4.34  | 0.26  |
| 291 | deng kou xian                    | No | 40.64 | 33.14 | 8.04  |
| 292 | wu la te qian qi                 | No | 19.40 | 19.26 | 10.45 |
| 293 | wu la te zhong qi                | No | 0.73  | 0.65  | 0.08  |
| 294 | wu la te hou qi                  | No | 3.52  | 3.07  | 0.53  |
| 295 | hang jin hou qi                  | No | 5.32  | 0.04  | 5.28  |
| 296 | ji ning qu                       | No | 13.40 | 10.37 | 3.45  |
| 297 | liang cheng xian                 | No | 15.91 | 15.68 | 3.10  |
| 298 | feng zhen shi                    | No | 10.94 | 10.94 | 0.00  |
| 299 | wu lan hao te shi                | No | 1.16  | 0.00  | 1.16  |
| 300 | er lian hao te shi               | No | 2.13  | 2.13  | 1.43  |
| 301 | xi lin hao te shi                | No | 39.24 | 38.48 | 1.06  |
| 302 | a ba ga qi                       | No | 9.30  | 9.30  | 0.00  |
| 303 | su ni te zuo qi                  | No | 1.87  | 1.68  | 0.25  |
| 304 | dong wu zhu mu qin qi            | No | 16.84 | 16.19 | 0.71  |
| 305 | xi wu zhu mu qin qi              | No | 5.98  | 5.96  | 0.25  |
| 306 | xiang huang qi                   | No | 0.56  | 0.56  | 0.00  |
| 307 | zheng lan qi                     | No | 14.61 | 13.27 | 1.34  |
| 308 | duo lun xian                     | No | 16.13 | 11.91 | 4.22  |
| 309 | a la shan zuo qi                 | No | 19.35 | 19.17 | 0.24  |
| 310 | a la shan you qi                 | No | 16.73 | 16.63 | 0.55  |
| 311 | e ji na qi                       | No | 1.29  | 1.22  | 0.20  |
| 312 | he ping qu                       | No | 0.00  | 0.00  | 0.00  |
| 313 | shen he qu                       | No | 0.00  | 0.00  | 0.00  |
| 314 | da dong qu                       | No | 0.00  | 0.00  | 0.00  |
| 315 | huang gu qu                      | No | 0.00  | 0.00  | 0.00  |
| 316 | tie xi qu                        | No | 0.00  | 0.00  | 0.00  |
| 317 | su jia tun qu                    | No | 7.60  | 6.45  | 1.34  |
| 318 | dong ling qu                     | No | 1.10  | 0.09  | 1.09  |
| 319 | shen bei xin qu                  | No | 7.27  | 6.08  | 1.94  |
| 320 | yu hong qu                       | No | 0.00  | 0.00  | 0.00  |
| 321 | liao zhong xian                  | No | 6.51  | 3.52  | 3.88  |
| 322 | kang ping xian                   | No | 7.46  | 5.93  | 1.54  |
| 323 | fa ku xian                       | No | 14.50 | 13.27 | 1.23  |

|     |                                         |    |        |       |        |
|-----|-----------------------------------------|----|--------|-------|--------|
| 324 | xin min shi                             | No | 0.87   | 0.87  | 0.00   |
| 325 | zhong shan qu                           | No | 9.01   | 0.00  | 9.01   |
| 326 | xi gang qu                              | No | 39.51  | 0.00  | 39.51  |
| 327 | sha he kou qu                           | No | 40.83  | 0.00  | 40.83  |
| 328 | gan jing zi qu                          | No | 49.17  | 43.54 | 6.39   |
| 329 | lu shun kou qu                          | No | 47.90  | 37.44 | 13.37  |
| 330 | jin zhou qu                             | No | 14.07  | 3.09  | 11.48  |
| 331 | zhang hai xian                          | No | 12.65  | 0.78  | 11.96  |
| 332 | wa fang dian shi                        | No | 10.63  | 9.06  | 2.28   |
| 333 | pu lan dian shi                         | No | 4.56   | 0.16  | 4.40   |
| 334 | zhuang he shi                           | No | 3.77   | 0.91  | 3.72   |
| 335 | tie dong qu                             | No | 100.00 | 24.53 | 100.00 |
| 336 | tie xi qu                               | No | 0.00   | 0.00  | 0.00   |
| 337 | li shan qu                              | No | 4.13   | 0.00  | 4.13   |
| 338 | qian shan qu                            | No | 15.99  | 0.00  | 15.99  |
| 339 | tai an xian                             | No | 7.46   | 7.46  | 1.73   |
| 340 | xiu yan man zu zi zhi xian              | No | 2.54   | 2.37  | 0.36   |
| 341 | hai cheng shi                           | No | 7.81   | 6.87  | 1.66   |
| 342 | xin fu qu                               | No | 0.00   | 0.00  | 0.00   |
| 343 | dong zhou qu                            | No | 1.04   | 0.00  | 1.04   |
| 344 | wang hua qu                             | No | 0.00   | 0.00  | 0.00   |
| 345 | shun cheng qu                           | No | 0.14   | 0.00  | 0.14   |
| 346 | fu shun xian                            | No | 7.90   | 3.30  | 6.69   |
| 347 | xin bin man zu zi zhi xian              | No | 5.14   | 4.56  | 1.86   |
| 348 | qing yuan man zu zi zhi xian            | No | 8.40   | 4.76  | 4.84   |
| 349 | ping shan qu                            | No | 14.10  | 0.13  | 14.00  |
| 350 | xi hu qu                                | No | 7.87   | 0.26  | 7.76   |
| 351 | ming shan qu                            | No | 16.59  | 0.80  | 16.57  |
| 352 | nan fen qu                              | No | 6.36   | 0.33  | 6.25   |
| 353 | ben xi man zu zi zhi xian               | No | 7.08   | 3.04  | 4.75   |
| 354 | huan ren man zu zi zhi xian             | No | 8.50   | 3.41  | 5.71   |
| 355 | yuan bao qu                             | No | 0.00   | 0.00  | 0.00   |
| 356 | zhen xing qu                            | No | 0.00   | 0.00  | 0.00   |
| 357 | zhen an qu                              | No | 3.52   | 3.47  | 0.71   |
| 358 | kuan dian man zu zi zhi xian            | No | 21.64  | 21.40 | 0.77   |
| 359 | dong gang shi                           | No | 27.44  | 27.26 | 0.18   |
| 360 | feng cheng shi                          | No | 12.47  | 12.25 | 1.22   |
| 361 | gu ta qu                                | No | 0.00   | 0.00  | 0.00   |
| 362 | ling he qu                              | No | 0.00   | 0.00  | 0.00   |
| 363 | tai he qu                               | No | 0.00   | 0.00  | 0.00   |
| 364 | hei shan xian                           | No | 3.87   | 3.42  | 0.44   |
| 365 | yi xian                                 | No | 12.86  | 12.14 | 3.24   |
| 366 | ling hai shi                            | No | 3.37   | 0.31  | 3.06   |
| 367 | bei zhen shi                            | No | 6.09   | 3.13  | 3.29   |
| 368 | zhan qian qu                            | No | 0.00   | 0.00  | 0.00   |
| 369 | xi shi qu                               | No | 0.00   | 0.00  | 0.00   |
| 370 | ba yu quan qu                           | No | 0.00   | 0.00  | 0.00   |
| 371 | lao bian qu                             | No | 0.00   | 0.00  | 0.00   |
| 372 | gai zhou shi                            | No | 10.64  | 9.84  | 2.12   |
| 373 | da shi qiao shi                         | No | 0.36   | 0.02  | 0.33   |
| 374 | hai zhou qu                             | No | 18.82  | 0.00  | 18.82  |
| 375 | xin qiu qu                              | No | 5.54   | 0.16  | 5.38   |
| 376 | tai ping qu                             | No | 0.00   | 0.00  | 0.00   |
| 377 | qing he men qu                          | No | 0.00   | 0.00  | 0.00   |
| 378 | xi he qu                                | No | 0.00   | 0.00  | 0.00   |
| 379 | fu xin meng gu zu zi zhi xian           | No | 4.00   | 3.84  | 0.37   |
| 380 | zhang wu xian                           | No | 6.83   | 4.98  | 3.28   |
| 381 | bai ta qu                               | No | 0.00   | 0.00  | 0.00   |
| 382 | wen sheng qu                            | No | 0.00   | 0.00  | 0.00   |
| 383 | hong wei qu                             | No | 13.68  | 0.00  | 13.68  |
| 384 | gong zhang ling qu                      | No | 21.88  | 20.89 | 0.99   |
| 385 | tai zi he qu                            | No | 1.06   | 0.00  | 1.06   |
| 386 | liao yang xian                          | No | 10.06  | 8.90  | 1.16   |
| 387 | deng ta shi                             | No | 3.20   | 3.08  | 0.12   |
| 388 | shuang tai zi qu                        | No | 0.00   | 0.00  | 0.00   |
| 389 | xing long tai qu                        | No | 5.31   | 0.34  | 5.30   |
| 390 | da wa xian                              | No | 18.99  | 17.02 | 8.80   |
| 391 | pan shan xian                           | No | 27.79  | 25.59 | 14.23  |
| 392 | yin zhou qu                             | No | 1.34   | 1.34  | 0.00   |
| 393 | qing he qu                              | No | 0.33   | 0.00  | 0.33   |
| 394 | tie ling xian                           | No | 21.24  | 17.73 | 3.51   |
| 395 | xi feng xian                            | No | 6.70   | 6.09  | 1.50   |
| 396 | chang tu xian                           | No | 0.64   | 0.26  | 0.38   |
| 397 | diao bing shan shi                      | No | 0.01   | 0.01  | 0.00   |
| 398 | kai yuan shi                            | No | 0.98   | 0.95  | 0.03   |
| 399 | shuang ta qu                            | No | 12.93  | 8.71  | 6.15   |
| 400 | long cheng qu                           | No | 13.12  | 9.90  | 3.21   |
| 401 | chao yang xian                          | No | 13.74  | 13.39 | 0.36   |
| 402 | jian ping xian                          | No | 2.67   | 2.66  | 0.25   |
| 403 | ka la qin zuo yi meng gu zu zi zhi xian | No | 14.72  | 14.47 | 1.28   |
| 404 | bei piao shi                            | No | 18.87  | 16.94 | 3.61   |
| 405 | ling yuan shi                           | No | 27.97  | 25.12 | 3.36   |
| 406 | lian shan qu                            | No | 6.83   | 6.00  | 0.82   |
| 407 | long gang qu                            | No | 0.06   | 0.00  | 0.06   |
| 408 | nan piao qu                             | No | 0.00   | 0.00  | 0.00   |
| 409 | sui zhong xian                          | No | 8.24   | 5.30  | 2.94   |
| 410 | jian chang xian                         | No | 7.76   | 5.99  | 3.29   |
| 411 | xing cheng shi                          | No | 10.37  | 6.18  | 4.19   |
| 412 | nan guan qu                             | No | 33.44  | 0.10  | 33.44  |
| 413 | kuan cheng qu                           | No | 2.41   | 0.00  | 2.41   |
| 414 | chao yang qu                            | No | 5.45   | 0.00  | 5.45   |
| 415 | er dao qu                               | No | 6.89   | 6.29  | 0.60   |
| 416 | lu yuan qu                              | No | 0.00   | 0.00  | 0.00   |
| 417 | shuang yang qu                          | No | 3.00   | 0.05  | 2.95   |
| 418 | nong an xian                            | No | 5.59   | 4.70  | 0.89   |
| 419 | jiu tai shi                             | No | 3.02   | 3.02  | 0.00   |
| 420 | yu shu shi                              | No | 0.24   | 0.00  | 0.24   |
| 421 | de hui shi                              | No | 0.02   | 0.02  | 0.00   |
| 422 | chang yi qu                             | No | 6.48   | 6.48  | 0.00   |
| 423 | long lan qu                             | No | 0.13   | 0.00  | 0.13   |
| 424 | chuan ying qu                           | No | 0.00   | 0.00  | 0.00   |
| 425 | feng man qu                             | No | 73.81  | 0.02  | 73.81  |
| 426 | yong ji xian                            | No | 1.16   | 1.06  | 0.10   |
| 427 | jiao he shi                             | No | 45.51  | 3.84  | 42.98  |
| 428 | hua dian shi                            | No | 75.59  | 12.37 | 66.79  |
| 429 | shu lan shi                             | No | 0.75   | 0.02  | 0.73   |
| 430 | pan shi shi                             | No | 1.34   | 0.00  | 1.34   |
| 431 | tie xi qu                               | No | 0.00   | 0.00  | 0.00   |
| 432 | tie dong qu                             | No | 37.55  | 3.40  | 36.17  |

|     |                                           |    |        |        |       |
|-----|-------------------------------------------|----|--------|--------|-------|
| 433 | li shu xian                               | No | 3.64   | 0.00   | 3.64  |
| 434 | yi tong man zu zi zhi xian                | No | 10.70  | 9.84   | 1.25  |
| 435 | gong zhu ling shi                         | No | 0.05   | 0.01   | 0.05  |
| 436 | shuang liao shi                           | No | 5.09   | 2.13   | 2.96  |
| 437 | long shan qu                              | No | 0.00   | 0.00   | 0.00  |
| 438 | xi an qu                                  | No | 6.74   | 1.85   | 6.74  |
| 439 | dong feng xian                            | No | 2.48   | 0.00   | 2.48  |
| 440 | dong liao xian                            | No | 2.05   | 0.01   | 2.04  |
| 441 | dong chang qu                             | No | 3.94   | 1.24   | 2.70  |
| 442 | er dao jiang qu                           | No | 0.00   | 0.00   | 0.00  |
| 443 | tong hua xian                             | No | 5.47   | 4.50   | 1.18  |
| 444 | hui nan xian                              | No | 8.93   | 8.76   | 4.86  |
| 445 | liu he xian                               | No | 7.51   | 7.23   | 0.29  |
| 446 | mei he kou shi                            | No | 2.77   | 0.00   | 2.77  |
| 447 | ji an shi                                 | No | 5.16   | 4.26   | 1.97  |
| 448 | hun jiang qu                              | No | 21.20  | 8.03   | 13.26 |
| 449 | jiang yuan qu                             | No | 14.40  | 0.13   | 14.34 |
| 450 | fu song xian                              | No | 54.03  | 23.03  | 38.36 |
| 451 | zhang bai chao xian zu zi zhi xian        | No | 23.98  | 20.15  | 13.16 |
| 452 | lin jiang shi                             | No | 12.75  | 3.99   | 8.76  |
| 453 | ning jiang qu                             | No | 2.93   | 0.41   | 2.60  |
| 454 | qian guo er luo si meng gu zu zi zhi xian | No | 7.35   | 6.77   | 0.59  |
| 455 | zhang ling xian                           | No | 3.25   | 3.25   | 0.00  |
| 456 | qian an xian                              | No | 6.92   | 6.92   | 3.12  |
| 457 | fu yu xian                                | No | 11.55  | 9.15   | 2.85  |
| 458 | tao bei qu                                | No | 0.67   | 0.00   | 0.67  |
| 459 | tao nan shi                               | No | 0.56   | 0.08   | 0.48  |
| 460 | yan ji shi                                | No | 1.62   | 0.00   | 1.62  |
| 461 | tu men shi                                | No | 17.37  | 5.04   | 12.33 |
| 462 | dun hua shi                               | No | 25.64  | 9.77   | 16.24 |
| 463 | hui chun shi                              | No | 58.95  | 55.90  | 6.69  |
| 464 | dao li qu                                 | No | 3.74   | 0.04   | 3.70  |
| 465 | nan gang qu                               | No | 0.31   | 0.00   | 0.31  |
| 466 | dao wai qu                                | No | 17.73  | 16.94  | 1.53  |
| 467 | ping fang qu                              | No | 0.00   | 0.00   | 0.00  |
| 468 | song bei qu                               | No | 11.04  | 0.23   | 10.81 |
| 469 | xiang fang qu                             | No | 0.51   | 0.00   | 0.51  |
| 470 | hu lan qu                                 | No | 8.73   | 7.12   | 4.05  |
| 471 | a cheng qu                                | No | 7.52   | 0.77   | 7.16  |
| 472 | yi lan xian                               | No | 2.41   | 1.79   | 0.62  |
| 473 | fang zheng xian                           | No | 16.48  | 4.92   | 11.57 |
| 474 | bin xian                                  | No | 7.53   | 2.80   | 4.95  |
| 475 | ba yan xian                               | No | 3.27   | 2.72   | 0.56  |
| 476 | mu lan xian                               | No | 4.57   | 0.42   | 4.48  |
| 477 | tong he xian                              | No | 34.44  | 8.50   | 30.48 |
| 478 | shuang cheng shi                          | No | 5.88   | 5.88   | 1.00  |
| 479 | shang zhi shi                             | No | 12.76  | 2.22   | 11.36 |
| 480 | wu chang shi                              | No | 12.98  | 5.33   | 11.99 |
| 481 | long sha qu                               | No | 1.75   | 0.00   | 1.75  |
| 482 | jian hua qu                               | No | 3.53   | 3.28   | 0.25  |
| 483 | tie feng qu                               | No | 59.03  | 59.03  | 0.00  |
| 484 | ang ang xi qu                             | No | 32.61  | 29.73  | 2.88  |
| 485 | fu la er ji qu                            | No | 0.00   | 0.00   | 0.00  |
| 486 | nian zi shan qu                           | No | 15.70  | 0.00   | 15.70 |
| 487 | mei li si da wo er zu qu                  | No | 17.29  | 13.92  | 3.37  |
| 488 | yi an xian                                | No | 7.30   | 7.30   | 0.00  |
| 489 | ke shan xian                              | No | 8.72   | 8.72   | 0.00  |
| 490 | ne he shi                                 | No | 14.81  | 13.38  | 1.43  |
| 491 | ji guan qu                                | No | 1.55   | 0.00   | 1.55  |
| 492 | heng shan qu                              | No | 7.32   | 0.00   | 7.32  |
| 493 | di dao qu                                 | No | 0.40   | 0.00   | 0.40  |
| 494 | li shu qu                                 | No | 0.14   | 0.00   | 0.14  |
| 495 | cheng zi he qu                            | No | 1.61   | 0.00   | 1.61  |
| 496 | ma shan qu                                | No | 0.77   | 0.00   | 0.77  |
| 497 | ji dong xian                              | No | 12.85  | 11.80  | 2.18  |
| 498 | hu lin shi                                | No | 22.72  | 20.19  | 5.30  |
| 499 | mi shan shi                               | No | 36.37  | 29.68  | 35.47 |
| 500 | xiang yang qu                             | No | 0.00   | 0.00   | 0.00  |
| 501 | gong nong qu                              | No | 0.00   | 0.00   | 0.00  |
| 502 | nan shan qu                               | No | 100.00 | 100.00 | 41.06 |
| 503 | xing an qu                                | No | 0.00   | 0.00   | 0.00  |
| 504 | dong shan qu                              | No | 8.88   | 5.18   | 3.70  |
| 505 | xing shan qu                              | No | 0.00   | 0.00   | 0.00  |
| 506 | luo bei xian                              | No | 10.78  | 6.64   | 6.72  |
| 507 | jian shan qu                              | No | 7.67   | 0.00   | 7.67  |
| 508 | ling dong qu                              | No | 49.52  | 9.19   | 45.11 |
| 509 | si fang tai qu                            | No | 0.00   | 0.00   | 0.00  |
| 510 | bao shan qu                               | No | 0.21   | 0.00   | 0.21  |
| 511 | ji xian xian                              | No | 5.71   | 1.71   | 4.17  |
| 512 | you yi xian                               | No | 2.03   | 2.03   | 0.00  |
| 513 | bao qing xian                             | No | 13.42  | 8.24   | 6.96  |
| 514 | sa er tu qu                               | No | 12.53  | 10.92  | 12.53 |
| 515 | long feng qu                              | No | 7.63   | 7.63   | 0.00  |
| 516 | rang hu lu qu                             | No | 0.32   | 0.00   | 0.32  |
| 517 | hong gang qu                              | No | 0.07   | 0.00   | 0.07  |
| 518 | da tong qu                                | No | 5.08   | 2.93   | 2.14  |
| 519 | zhao zhou xian                            | No | 0.96   | 0.96   | 0.00  |
| 520 | zhao yuan xian                            | No | 12.19  | 12.12  | 0.88  |
| 521 | du er bo te meng gu zu zi zhi xian        | No | 18.83  | 18.44  | 0.39  |
| 522 | yi chun qu                                | No | 52.83  | 47.62  | 52.83 |
| 523 | nan cha qu                                | No | 3.47   | 0.02   | 3.47  |
| 524 | you hao qu                                | No | 7.94   | 7.16   | 0.86  |
| 525 | xi lin qu                                 | No | 0.00   | 0.00   | 0.00  |
| 526 | cui luan qu                               | No | 48.24  | 47.58  | 0.66  |
| 527 | xin qing qu                               | No | 5.88   | 0.41   | 5.62  |
| 528 | mei xi qu                                 | No | 3.32   | 0.30   | 3.01  |
| 529 | jin shan tun qu                           | No | 6.38   | 0.02   | 6.36  |
| 530 | wu ying qu                                | No | 33.56  | 18.12  | 15.45 |
| 531 | wu ma he qu                               | No | 28.00  | 16.97  | 11.07 |
| 532 | tang wang he qu                           | No | 21.57  | 18.62  | 14.75 |
| 533 | dai ling qu                               | No | 20.99  | 14.50  | 6.49  |
| 534 | wu yi ling qu                             | No | 29.67  | 29.67  | 0.00  |
| 535 | hong xing qu                              | No | 5.99   | 4.79   | 1.50  |
| 536 | shang gan ling qu                         | No | 7.53   | 1.25   | 6.28  |
| 537 | jia yin xian                              | No | 25.77  | 24.54  | 2.92  |
| 538 | tie li shi                                | No | 25.72  | 4.90   | 21.19 |
| 539 | jia mu si shi qu                          | No | 10.64  | 6.80   | 3.84  |
| 540 | fu jin shi                                | No | 16.49  | 15.91  | 1.67  |
| 541 | xin xing qu                               | No | 0.03   | 0.00   | 0.03  |

|     |                    |    |        |       |        |
|-----|--------------------|----|--------|-------|--------|
| 542 | tao shan qu        | No | 5.85   | 0.00  | 5.85   |
| 543 | qie zi he qu       | No | 6.22   | 0.28  | 6.22   |
| 544 | bo li xian         | No | 7.64   | 4.75  | 4.60   |
| 545 | dong an qu         | No | 33.82  | 33.82 | 33.82  |
| 546 | yang ming qu       | No | 1.31   | 0.07  | 1.31   |
| 547 | ai min qu          | No | 18.39  | 2.32  | 18.31  |
| 548 | xi an qu           | No | 4.61   | 1.27  | 4.61   |
| 549 | dong ning xian     | No | 19.57  | 17.25 | 2.38   |
| 550 | lin kou xian       | No | 13.68  | 3.60  | 11.88  |
| 551 | sui fen he shi     | No | 7.31   | 5.05  | 2.26   |
| 552 | hai lin shi        | No | 69.24  | 20.08 | 67.04  |
| 553 | ning an shi        | No | 50.56  | 20.03 | 50.31  |
| 554 | mu leng shi        | No | 15.91  | 8.42  | 8.21   |
| 555 | ai hui qu          | No | 10.92  | 10.29 | 0.63   |
| 556 | nen jiang xian     | No | 5.63   | 5.30  | 0.35   |
| 557 | xun ke xian        | No | 36.29  | 31.59 | 11.55  |
| 558 | sun wu xian        | No | 13.81  | 10.98 | 2.84   |
| 559 | bei an shi         | No | 25.44  | 25.24 | 0.57   |
| 560 | wu da lian chi shi | No | 24.59  | 22.87 | 14.41  |
| 561 | bei lin qu         | No | 0.01   | 0.01  | 0.00   |
| 562 | qing an xian       | No | 9.19   | 4.78  | 4.79   |
| 563 | sui leng xian      | No | 17.40  | 15.07 | 3.32   |
| 564 | an da shi          | No | 6.13   | 4.79  | 1.33   |
| 565 | zhao dong shi      | No | 10.39  | 10.16 | 0.63   |
| 566 | hu ma xian         | No | 22.41  | 20.18 | 4.04   |
| 567 | ta he xian         | No | 26.25  | 22.91 | 3.60   |
| 568 | mo he xian         | No | 25.67  | 22.63 | 3.05   |
| 569 | huang pu qu        | No | 0.00   | 0.00  | 0.00   |
| 570 | lu wan qu          | No | 0.00   | 0.00  | 0.00   |
| 571 | xu hui qu          | No | 0.00   | 0.00  | 0.00   |
| 572 | zhang ning qu      | No | 0.00   | 0.00  | 0.00   |
| 573 | jing an qu         | No | 0.00   | 0.00  | 0.00   |
| 574 | pu tuo qu          | No | 100.00 | 0.02  | 100.00 |
| 575 | zha bei qu         | No | 0.00   | 0.00  | 0.00   |
| 576 | hong kou qu        | No | 0.00   | 0.00  | 0.00   |
| 577 | yang pu qu         | No | 2.08   | 0.00  | 2.08   |
| 578 | min hang qu        | No | 0.00   | 0.00  | 0.00   |
| 579 | bao shan qu        | No | 0.24   | 0.00  | 0.24   |
| 580 | jia ding qu        | No | 0.01   | 0.00  | 0.01   |
| 581 | pu dong xin qu     | No | 3.54   | 3.54  | 0.00   |
| 582 | jin shan qu        | No | 1.38   | 1.38  | 0.00   |
| 583 | song jiang qu      | No | 0.43   | 0.00  | 0.43   |
| 584 | qing pu qu         | No | 0.00   | 0.00  | 0.00   |
| 585 | feng xian qu       | No | 0.95   | 0.00  | 0.95   |
| 586 | chong ming xian    | No | 10.54  | 10.06 | 2.75   |
| 587 | xuan wu qu         | No | 37.73  | 0.00  | 37.73  |
| 588 | bai xia qu         | No | 1.25   | 0.00  | 1.25   |
| 589 | qin huai qu        | No | 0.00   | 0.00  | 0.00   |
| 590 | jian ye qu         | No | 18.40  | 18.40 | 0.00   |
| 591 | gu lou qu          | No | 15.92  | 0.00  | 15.92  |
| 592 | xia guan qu        | No | 18.47  | 6.81  | 11.67  |
| 593 | pu kou qu          | No | 10.27  | 2.94  | 7.43   |
| 594 | qi xia qu          | No | 5.75   | 0.00  | 5.75   |
| 595 | yu hua tai qu      | No | 12.27  | 3.42  | 8.85   |
| 596 | jiang ning qu      | No | 7.13   | 2.36  | 4.99   |
| 597 | liu he qu          | No | 3.81   | 0.00  | 3.81   |
| 598 | li shui xian       | No | 2.72   | 0.01  | 2.70   |
| 599 | gao chun xian      | No | 12.39  | 1.57  | 11.74  |
| 600 | chong an qu        | No | 0.00   | 0.00  | 0.00   |
| 601 | nan zhang qu       | No | 0.00   | 0.00  | 0.00   |
| 602 | bei tang qu        | No | 6.47   | 0.00  | 6.47   |
| 603 | xi shan qu         | No | 0.89   | 0.00  | 0.89   |
| 604 | hui shan qu        | No | 1.98   | 0.00  | 1.98   |
| 605 | bin hu qu          | No | 3.25   | 0.00  | 3.25   |
| 606 | jiang yin shi      | No | 0.45   | 0.00  | 0.45   |
| 607 | yi xing shi        | No | 2.59   | 0.06  | 2.56   |
| 608 | gu lou qu          | No | 1.80   | 0.00  | 1.80   |
| 609 | yun long qu        | No | 2.87   | 0.41  | 2.46   |
| 610 | jiu li qu          | No | 3.90   | 0.00  | 3.90   |
| 611 | jia wang qu        | No | 8.04   | 6.28  | 4.17   |
| 612 | quan shan qu       | No | 9.78   | 5.71  | 9.77   |
| 613 | feng xian          | No | 0.22   | 0.00  | 0.22   |
| 614 | pei xian           | No | 2.22   | 1.83  | 0.39   |
| 615 | tong shan xian     | No | 10.41  | 10.37 | 0.04   |
| 616 | sui ning xian      | No | 0.70   | 0.00  | 0.70   |
| 617 | xin yi shi         | No | 15.22  | 14.58 | 3.89   |
| 618 | pi zhou shi        | No | 5.14   | 2.14  | 3.00   |
| 619 | tian ning qu       | No | 0.00   | 0.00  | 0.00   |
| 620 | zhong lou qu       | No | 0.00   | 0.00  | 0.00   |
| 621 | qi shu yan qu      | No | 0.00   | 0.00  | 0.00   |
| 622 | xin bei qu         | No | 0.00   | 0.00  | 0.00   |
| 623 | wu jin qu          | No | 1.25   | 0.00  | 1.25   |
| 624 | li yang shi        | No | 4.42   | 0.43  | 4.41   |
| 625 | jin tan shi        | No | 10.00  | 0.00  | 10.00  |
| 626 | cang lang qu       | No | 0.00   | 0.00  | 0.00   |
| 627 | ping jiang qu      | No | 0.00   | 0.00  | 0.00   |
| 628 | jin chang qu       | No | 0.00   | 0.00  | 0.00   |
| 629 | hu qiu qu          | No | 6.59   | 0.00  | 6.59   |
| 630 | wu zhong qu        | No | 4.41   | 0.02  | 4.41   |
| 631 | xiang cheng qu     | No | 0.74   | 0.00  | 0.74   |
| 632 | chang shu shi      | No | 2.04   | 0.00  | 2.04   |
| 633 | zhang jia gang shi | No | 0.20   | 0.00  | 0.20   |
| 634 | kun shan shi       | No | 1.76   | 0.00  | 1.76   |
| 635 | wu jiang shi       | No | 1.20   | 0.00  | 1.20   |
| 636 | tai cang shi       | No | 0.39   | 0.00  | 0.39   |
| 637 | chong chuan qu     | No | 6.38   | 0.00  | 6.38   |
| 638 | gang zha qu        | No | 0.00   | 0.00  | 0.00   |
| 639 | hai an xian        | No | 0.11   | 0.00  | 0.11   |
| 640 | ru dong xian       | No | 2.50   | 1.09  | 1.41   |
| 641 | qi dong shi        | No | 6.24   | 5.67  | 0.58   |
| 642 | ru gao shi         | No | 0.00   | 0.00  | 0.00   |
| 643 | tong zhou qu       | No | 0.14   | 0.00  | 0.14   |
| 644 | hai men shi        | No | 0.86   | 0.00  | 0.86   |
| 645 | lian yun qu        | No | 23.31  | 0.08  | 23.23  |
| 646 | xin pu qu          | No | 15.31  | 0.00  | 15.31  |
| 647 | hai zhou qu        | No | 8.11   | 0.00  | 8.11   |
| 648 | gan yu xian        | No | 11.34  | 0.00  | 11.34  |
| 649 | dong hai xian      | No | 1.00   | 0.00  | 1.00   |
| 650 | guan yun xian      | No | 0.33   | 0.00  | 0.33   |

|     |                 |    |       |       |       |
|-----|-----------------|----|-------|-------|-------|
| 651 | guan nan xian   | No | 0.17  | 0.00  | 0.17  |
| 652 | qing he qu      | No | 1.29  | 0.00  | 1.29  |
| 653 | chu zhou qu     | No | 0.10  | 0.10  | 0.00  |
| 654 | huai yin qu     | No | 0.40  | 0.36  | 0.04  |
| 655 | qing pu qu      | No | 0.00  | 0.00  | 0.00  |
| 656 | lian shui xian  | No | 1.90  | 1.90  | 0.00  |
| 657 | hong ze xian    | No | 32.14 | 31.68 | 1.03  |
| 658 | xu yi xian      | No | 13.97 | 11.37 | 3.45  |
| 659 | jin hu xian     | No | 6.75  | 4.57  | 2.19  |
| 660 | ting hu qu      | No | 0.41  | 0.00  | 0.41  |
| 661 | yan dou qu      | No | 1.78  | 0.00  | 1.78  |
| 662 | xiang shui xian | No | 12.04 | 12.04 | 0.00  |
| 663 | bin hai xian    | No | 5.99  | 5.99  | 0.00  |
| 664 | fu ning xian    | No | 0.41  | 0.08  | 0.33  |
| 665 | she yang xian   | No | 18.29 | 17.72 | 0.58  |
| 666 | jian hu xian    | No | 0.67  | 0.00  | 0.67  |
| 667 | dong tai shi    | No | 9.38  | 7.93  | 1.44  |
| 668 | da feng shi     | No | 23.51 | 22.87 | 0.80  |
| 669 | guang ling qu   | No | 0.00  | 0.00  | 0.00  |
| 670 | han jiang qu    | No | 1.95  | 0.43  | 1.51  |
| 671 | wei yang qu     | No | 0.00  | 0.00  | 0.00  |
| 672 | bao ying xian   | No | 12.01 | 11.16 | 1.11  |
| 673 | yi zheng shi    | No | 1.75  | 0.00  | 1.75  |
| 674 | gao you shi     | No | 22.42 | 22.15 | 0.27  |
| 675 | jiang dou shi   | No | 1.41  | 1.19  | 0.40  |
| 676 | jing kou qu     | No | 11.85 | 11.85 | 0.00  |
| 677 | run zhou qu     | No | 12.31 | 3.85  | 8.46  |
| 678 | dan tu qu       | No | 3.29  | 3.23  | 0.06  |
| 679 | dan yang shi    | No | 0.00  | 0.00  | 0.00  |
| 680 | yang zhong shi  | No | 0.00  | 0.00  | 0.00  |
| 681 | ju rong shi     | No | 3.74  | 0.10  | 3.74  |
| 682 | hai ling qu     | No | 0.00  | 0.00  | 0.00  |
| 683 | gao gang qu     | No | 3.44  | 0.00  | 3.44  |
| 684 | xing hua shi    | No | 0.55  | 0.00  | 0.55  |
| 685 | jing jiang shi  | No | 0.00  | 0.00  | 0.00  |
| 686 | tai xing shi    | No | 0.91  | 0.00  | 0.91  |
| 687 | jiang yan shi   | No | 1.37  | 0.00  | 1.37  |
| 688 | xiu cheng qu    | No | 3.17  | 0.00  | 3.17  |
| 689 | xiu yu qu       | No | 6.03  | 4.90  | 1.14  |
| 690 | shu yang xian   | No | 0.17  | 0.00  | 0.17  |
| 691 | si yang xian    | No | 0.25  | 0.00  | 0.25  |
| 692 | si hong xian    | No | 14.34 | 14.34 | 0.23  |
| 693 | shang cheng qu  | No | 0.00  | 0.00  | 0.00  |
| 694 | xia cheng qu    | No | 0.00  | 0.00  | 0.00  |
| 695 | jiang gan qu    | No | 0.00  | 0.00  | 0.00  |
| 696 | gong shu qu     | No | 11.11 | 0.00  | 11.11 |
| 697 | xi hu qu        | No | 9.00  | 0.00  | 9.00  |
| 698 | bin jiang qu    | No | 0.00  | 0.00  | 0.00  |
| 699 | xiao shan qu    | No | 0.82  | 0.00  | 0.82  |
| 700 | yu hang qu      | No | 5.35  | 0.00  | 5.35  |
| 701 | tong lu xian    | No | 3.99  | 0.00  | 3.99  |
| 702 | chun an xian    | No | 20.21 | 0.02  | 20.20 |
| 703 | jian de shi     | No | 5.12  | 0.00  | 5.12  |
| 704 | fu yang shi     | No | 1.33  | 0.00  | 1.33  |
| 705 | lin an shi      | No | 11.19 | 4.65  | 6.67  |
| 706 | hai shu qu      | No | 0.00  | 0.00  | 0.00  |
| 707 | jiang dong qu   | No | 0.00  | 0.00  | 0.00  |
| 708 | jiang bei qu    | No | 7.66  | 0.00  | 7.66  |
| 709 | bei lun qu      | No | 0.56  | 0.00  | 0.56  |
| 710 | zhen hai qu     | No | 1.51  | 0.00  | 1.51  |
| 711 | yin zhou qu     | No | 2.47  | 0.00  | 2.47  |
| 712 | xiang shan xian | No | 7.46  | 4.86  | 2.59  |
| 713 | ning hai xian   | No | 2.33  | 0.00  | 2.33  |
| 714 | yu yao shi      | No | 6.29  | 0.00  | 6.29  |
| 715 | ci xi shi       | No | 4.03  | 0.00  | 4.03  |
| 716 | feng hua shi    | No | 5.02  | 0.00  | 5.02  |
| 717 | lu cheng qu     | No | 9.08  | 0.00  | 9.08  |
| 718 | long wan qu     | No | 5.69  | 0.00  | 5.69  |
| 719 | ou hai qu       | No | 16.78 | 0.00  | 16.78 |
| 720 | dong tou xian   | No | 26.81 | 0.00  | 26.81 |
| 721 | yong jia xian   | No | 2.09  | 0.18  | 1.91  |
| 722 | ping yang xian  | No | 12.48 | 11.40 | 1.09  |
| 723 | cang nan xian   | No | 3.55  | 0.03  | 3.52  |
| 724 | wen cheng xian  | No | 11.52 | 0.12  | 11.40 |
| 725 | tai shun xian   | No | 12.73 | 11.38 | 1.35  |
| 726 | rui an shi      | No | 3.11  | 0.00  | 3.11  |
| 727 | le qing shi     | No | 15.08 | 0.00  | 15.08 |
| 728 | nan hu qu       | No | 0.00  | 0.00  | 0.00  |
| 729 | xiu zhou qu     | No | 2.16  | 0.00  | 2.16  |
| 730 | jia shan xian   | No | 0.02  | 0.00  | 0.02  |
| 731 | hai yan xian    | No | 0.29  | 0.00  | 0.29  |
| 732 | hai ning shi    | No | 0.00  | 0.00  | 0.00  |
| 733 | ping hu shi     | No | 0.31  | 0.00  | 0.31  |
| 734 | tong xiang shi  | No | 0.00  | 0.00  | 0.00  |
| 735 | wu xing qu      | No | 1.71  | 0.00  | 1.71  |
| 736 | nan xun qu      | No | 0.72  | 0.00  | 0.72  |
| 737 | de qing xian    | No | 1.65  | 0.00  | 1.65  |
| 738 | zhang xing xian | No | 3.75  | 0.30  | 3.45  |
| 739 | an ji xian      | No | 6.83  | 0.69  | 6.76  |
| 740 | yue cheng qu    | No | 5.97  | 0.00  | 5.97  |
| 741 | shao xing xian  | No | 5.10  | 1.56  | 3.54  |
| 742 | xin chang xian  | No | 8.05  | 0.00  | 8.05  |
| 743 | zhu ji shi      | No | 5.79  | 2.12  | 3.67  |
| 744 | shang yu shi    | No | 2.91  | 2.09  | 0.81  |
| 745 | sheng zhou shi  | No | 2.69  | 0.03  | 2.67  |
| 746 | wu cheng qu     | No | 1.08  | 0.00  | 1.08  |
| 747 | jin dong qu     | No | 0.42  | 0.00  | 0.42  |
| 748 | wu yi xian      | No | 2.02  | 0.00  | 2.02  |
| 749 | pu jiang xian   | No | 3.07  | 0.00  | 3.07  |
| 750 | pan an xian     | No | 12.03 | 3.81  | 10.32 |
| 751 | lan xi shi      | No | 2.36  | 0.00  | 2.36  |
| 752 | yi wu shi       | No | 5.15  | 0.00  | 5.15  |
| 753 | dong yang shi   | No | 4.90  | 1.40  | 3.50  |
| 754 | yong kang shi   | No | 0.71  | 0.00  | 0.71  |
| 755 | ke cheng qu     | No | 3.38  | 0.00  | 3.38  |
| 756 | qu jiang qu     | No | 10.23 | 0.72  | 9.51  |
| 757 | chang shan xian | No | 7.27  | 1.96  | 5.87  |
| 758 | kai hua xian    | No | 6.16  | 3.61  | 2.55  |
| 759 | long you xian   | No | 2.97  | 0.00  | 2.97  |

|     |                              |    |       |       |       |
|-----|------------------------------|----|-------|-------|-------|
| 760 | jiang shan shi               | No | 5.88  | 3.45  | 2.75  |
| 761 | ding hai qu                  | No | 0.76  | 0.34  | 0.41  |
| 762 | pu tuo qu                    | No | 14.15 | 0.00  | 14.15 |
| 763 | dai shan xian                | No | 3.68  | 0.00  | 3.68  |
| 764 | sheng si xian                | No | 14.06 | 0.00  | 14.06 |
| 765 | jiao jiang qu                | No | 4.28  | 0.00  | 4.28  |
| 766 | huang yan qu                 | No | 0.82  | 0.00  | 0.82  |
| 767 | lu qiao qu                   | No | 0.03  | 0.00  | 0.03  |
| 768 | yu huan xian                 | No | 30.39 | 0.00  | 30.39 |
| 769 | san men xian                 | No | 0.80  | 0.00  | 0.80  |
| 770 | tian tai xian                | No | 2.99  | 0.00  | 2.99  |
| 771 | xian ju xian                 | No | 9.82  | 1.12  | 8.74  |
| 772 | wen ling shi                 | No | 4.31  | 0.00  | 4.31  |
| 773 | lin hai shi                  | No | 2.36  | 0.00  | 2.36  |
| 774 | lian dou qu                  | No | 8.14  | 3.27  | 4.91  |
| 775 | qing tian xian               | No | 1.98  | 0.16  | 1.82  |
| 776 | jin yun xian                 | No | 6.96  | 0.00  | 6.96  |
| 777 | sui chang xian               | No | 11.66 | 2.19  | 9.48  |
| 778 | song yang xian               | No | 2.36  | 0.00  | 2.36  |
| 779 | yun he xian                  | No | 4.24  | 0.00  | 4.24  |
| 780 | qing yuan xian               | No | 6.75  | 5.46  | 1.28  |
| 781 | jing ning she zu zi zhi xian | No | 6.81  | 1.98  | 5.01  |
| 782 | long quan shi                | No | 5.22  | 5.05  | 0.17  |
| 783 | yao hai qu                   | No | 0.00  | 0.00  | 0.00  |
| 784 | lu yang qu                   | No | 22.81 | 0.00  | 22.81 |
| 785 | shu shan qu                  | No | 6.94  | 0.00  | 6.94  |
| 786 | bao he qu                    | No | 10.70 | 0.00  | 10.70 |
| 787 | zhang feng xian              | No | 0.00  | 0.00  | 0.00  |
| 788 | fei dong xian                | No | 0.74  | 0.00  | 0.74  |
| 789 | fei xi xian                  | No | 1.82  | 0.00  | 1.82  |
| 790 | jing hu qu                   | No | 0.00  | 0.00  | 0.00  |
| 791 | yi jiang qu                  | No | 0.00  | 0.00  | 0.00  |
| 792 | jiu jiang qu                 | No | 0.00  | 0.00  | 0.00  |
| 793 | san shan qu                  | No | 0.00  | 0.00  | 0.00  |
| 794 | wu hu xian                   | No | 14.20 | 13.91 | 0.29  |
| 795 | fan chang xian               | No | 1.12  | 0.00  | 1.12  |
| 796 | nan ling xian                | No | 6.08  | 2.53  | 3.55  |
| 797 | long zi hu qu                | No | 0.00  | 0.00  | 0.00  |
| 798 | bang shan qu                 | No | 0.00  | 0.00  | 0.00  |
| 799 | yu hui qu                    | No | 0.00  | 0.00  | 0.00  |
| 800 | huai shang qu                | No | 3.44  | 0.00  | 3.44  |
| 801 | huai yuan xian               | No | 2.35  | 2.16  | 0.19  |
| 802 | wu he xian                   | No | 3.31  | 2.38  | 0.93  |
| 803 | gu zhen xian                 | No | 1.46  | 1.46  | 0.00  |
| 804 | da tong qu                   | No | 3.26  | 0.00  | 3.26  |
| 805 | tian jia an qu               | No | 3.01  | 0.00  | 3.01  |
| 806 | xie jia ji qu                | No | 4.31  | 0.00  | 4.31  |
| 807 | ba gong shan qu              | No | 41.81 | 0.00  | 41.81 |
| 808 | pan ji qu                    | No | 4.44  | 0.00  | 4.44  |
| 809 | feng tai xian                | No | 7.73  | 0.00  | 7.73  |
| 810 | jin jia zhuang qu            | No | 0.09  | 0.09  | 0.00  |
| 811 | hua shan qu                  | No | 0.95  | 0.00  | 0.95  |
| 812 | yu shan qu                   | No | 0.35  | 0.00  | 0.35  |
| 813 | dang tu xian                 | No | 8.99  | 7.41  | 1.58  |
| 814 | du ji qu                     | No | 0.86  | 0.00  | 0.86  |
| 815 | xiang shan qu                | No | 13.16 | 0.00  | 13.16 |
| 816 | lie shan qu                  | No | 1.41  | 1.40  | 0.01  |
| 817 | sui xi xian                  | No | 0.26  | 0.00  | 0.26  |
| 818 | tong guan shan qu            | No | 16.02 | 9.24  | 6.78  |
| 819 | shi zi shan qu               | No | 0.00  | 0.00  | 0.00  |
| 820 | jiao qu                      | No | 32.92 | 12.96 | 20.17 |
| 821 | tong ling xian               | No | 16.97 | 16.26 | 0.71  |
| 822 | ying jiang qu                | No | 28.77 | 28.77 | 0.00  |
| 823 | da guan qu                   | No | 21.08 | 21.08 | 0.00  |
| 824 | yi xiu qu                    | No | 23.78 | 5.62  | 18.16 |
| 825 | huai ning xian               | No | 0.91  | 0.64  | 0.27  |
| 826 | cong yang xian               | No | 12.14 | 9.59  | 2.55  |
| 827 | tong cheng shi               | No | 8.75  | 3.01  | 5.74  |
| 828 | tun xi qu                    | No | 5.69  | 0.00  | 5.69  |
| 829 | huang shan qu                | No | 25.84 | 6.18  | 22.28 |
| 830 | hui zhou qu                  | No | 15.32 | 13.24 | 3.83  |
| 831 | xi xian                      | No | 3.71  | 2.25  | 1.84  |
| 832 | xiu ning xian                | No | 8.07  | 4.62  | 4.74  |
| 833 | yi xian                      | No | 11.00 | 8.50  | 7.20  |
| 834 | qi men xian                  | No | 10.35 | 10.21 | 3.61  |
| 835 | lang ya qu                   | No | 3.50  | 0.00  | 3.50  |
| 836 | nan qiao qu                  | No | 6.59  | 2.77  | 6.59  |
| 837 | lai an xian                  | No | 0.77  | 0.00  | 0.77  |
| 838 | quan jiao xian               | No | 1.86  | 0.00  | 1.86  |
| 839 | ding yuan xian               | No | 0.15  | 0.01  | 0.15  |
| 840 | feng yang xian               | No | 4.22  | 0.00  | 4.22  |
| 841 | tian zhang shi               | No | 0.00  | 0.00  | 0.00  |
| 842 | ming guang shi               | No | 9.91  | 8.00  | 1.94  |
| 843 | ying zhou qu                 | No | 10.03 | 7.80  | 2.23  |
| 844 | ying quan qu                 | No | 11.16 | 10.31 | 0.89  |
| 845 | tai he xian                  | No | 0.63  | 0.00  | 0.63  |
| 846 | jie shou shi                 | No | 0.82  | 0.00  | 0.82  |
| 847 | yong qiao qu                 | No | 0.59  | 0.48  | 0.12  |
| 848 | ju chao qu                   | No | 0.88  | 0.00  | 0.88  |
| 849 | lu jiang xian                | No | 0.75  | 0.00  | 0.75  |
| 850 | wu wei xian                  | No | 4.47  | 3.98  | 0.50  |
| 851 | han shan xian                | No | 3.77  | 0.00  | 3.77  |
| 852 | he xian                      | No | 3.01  | 0.02  | 2.99  |
| 853 | jin an qu                    | No | 2.26  | 0.00  | 2.26  |
| 854 | huo shan xian                | No | 7.34  | 3.35  | 6.97  |
| 855 | qiao cheng qu                | No | 0.01  | 0.00  | 0.01  |
| 856 | wo yang xian                 | No | 0.41  | 0.00  | 0.41  |
| 857 | meng cheng xian              | No | 0.63  | 0.00  | 0.63  |
| 858 | gui chi qu                   | No | 12.87 | 10.72 | 2.15  |
| 859 | dong zhi xian                | No | 11.63 | 11.09 | 0.54  |
| 860 | qing yang xian               | No | 15.72 | 0.48  | 15.24 |
| 861 | xuan zhou qu                 | No | 4.17  | 2.78  | 1.48  |
| 862 | lang xi xian                 | No | 3.04  | 2.68  | 1.36  |
| 863 | guang de xian                | No | 5.06  | 2.46  | 2.61  |
| 864 | jing xian                    | No | 3.72  | 2.54  | 1.19  |
| 865 | ji xi xian                   | No | 5.76  | 4.43  | 1.33  |
| 866 | jing de xian                 | No | 2.61  | 0.18  | 2.43  |
| 867 | ning guo shi                 | No | 5.71  | 4.73  | 1.15  |
| 868 | gu lou qu                    | No | 11.93 | 0.00  | 11.93 |



|     |                 |    |       |       |       |
|-----|-----------------|----|-------|-------|-------|
| 869 | tai jiang qu    | No | 0.00  | 0.00  | 0.00  |
| 870 | cang shan qu    | No | 0.00  | 0.00  | 0.00  |
| 871 | ma wei qu       | No | 3.26  | 3.26  | 0.00  |
| 872 | jin an qu       | No | 12.75 | 7.66  | 5.09  |
| 873 | min hou xian    | No | 3.21  | 0.16  | 3.16  |
| 874 | lian jiang xian | No | 2.41  | 2.03  | 0.38  |
| 875 | luo yuan xian   | No | 0.35  | 0.01  | 0.35  |
| 876 | min qing xian   | No | 9.39  | 8.13  | 1.25  |
| 877 | yong tai xian   | No | 12.34 | 11.72 | 0.63  |
| 878 | ping tan xian   | No | 7.64  | 1.00  | 6.63  |
| 879 | fu qing shi     | No | 1.19  | 0.20  | 0.99  |
| 880 | zhang le shi    | No | 5.34  | 2.10  | 3.24  |
| 881 | si ming qu      | No | 23.36 | 10.97 | 12.81 |
| 882 | hai cang qu     | No | 21.58 | 9.36  | 12.23 |
| 883 | hu li qu        | No | 21.64 | 17.07 | 5.85  |
| 884 | ji mei qu       | No | 22.87 | 4.74  | 18.13 |
| 885 | tong an qu      | No | 11.25 | 0.00  | 11.25 |
| 886 | xiang an qu     | No | 1.63  | 1.62  | 0.01  |
| 887 | cheng xiang qu  | No | 2.26  | 0.00  | 2.26  |
| 888 | han jiang qu    | No | 8.37  | 3.88  | 4.49  |
| 889 | li cheng qu     | No | 3.49  | 0.00  | 3.49  |
| 890 | xu yu qu        | No | 3.60  | 0.01  | 3.59  |
| 891 | xian you xian   | No | 10.42 | 9.21  | 1.20  |
| 892 | mei lie qu      | No | 12.72 | 0.04  | 12.68 |
| 893 | san yuan qu     | No | 7.23  | 1.33  | 7.16  |
| 894 | ming xi xian    | No | 10.55 | 9.56  | 1.00  |
| 895 | qing liu xian   | No | 3.92  | 0.98  | 2.94  |
| 896 | ning hua xian   | No | 4.95  | 2.33  | 2.66  |
| 897 | da tian xian    | No | 3.64  | 2.96  | 0.83  |
| 898 | you xi xian     | No | 1.79  | 0.71  | 1.09  |
| 899 | sha xian        | No | 1.57  | 0.16  | 1.41  |
| 900 | jiang le xian   | No | 7.64  | 7.00  | 0.64  |
| 901 | tai ning xian   | No | 22.97 | 7.10  | 16.02 |
| 902 | jian ning xian  | No | 9.58  | 8.37  | 1.23  |
| 903 | yong an shi     | No | 6.85  | 3.70  | 3.15  |
| 904 | li cheng qu     | No | 0.00  | 0.00  | 0.00  |
| 905 | feng ze qu      | No | 18.42 | 14.61 | 3.82  |
| 906 | luo jiang qu    | No | 3.67  | 0.73  | 2.94  |
| 907 | quan gang qu    | No | 0.00  | 0.00  | 0.00  |
| 908 | hui an xian     | No | 4.89  | 1.32  | 3.56  |
| 909 | an xi xian      | No | 2.83  | 1.19  | 1.65  |
| 910 | yong chun xian  | No | 2.00  | 0.18  | 1.82  |
| 911 | de hua xian     | No | 11.58 | 6.68  | 4.89  |
| 912 | jin men xian    | No | 1.11  | 1.11  | 0.00  |
| 913 | shi shi shi     | No | 6.02  | 4.89  | 1.19  |
| 914 | jin jiang shi   | No | 7.03  | 5.09  | 3.55  |
| 915 | nan an shi      | No | 1.22  | 0.00  | 1.22  |
| 916 | xiang cheng qu  | No | 4.45  | 0.00  | 4.45  |
| 917 | long wen qu     | No | 0.00  | 0.00  | 0.00  |
| 918 | yun xiao xian   | No | 2.55  | 2.18  | 0.36  |
| 919 | zhang pu xian   | No | 3.82  | 2.52  | 1.30  |
| 920 | zhao an xian    | No | 5.99  | 0.66  | 5.32  |
| 921 | zhang tai xian  | No | 5.20  | 2.79  | 3.48  |
| 922 | dong shan xian  | No | 8.13  | 6.47  | 1.66  |
| 923 | nan jing xian   | No | 2.87  | 1.71  | 1.22  |
| 924 | ping he xian    | No | 3.03  | 2.51  | 0.80  |
| 925 | hua an xian     | No | 6.91  | 0.36  | 6.74  |
| 926 | long hai shi    | No | 4.57  | 2.47  | 2.10  |
| 927 | yan ping qu     | No | 3.76  | 3.53  | 0.22  |
| 928 | shun chang xian | No | 2.10  | 1.66  | 0.44  |
| 929 | pu cheng xian   | No | 2.33  | 0.20  | 2.30  |
| 930 | guang ze xian   | No | 11.54 | 8.31  | 3.23  |
| 931 | song xi xian    | No | 4.30  | 3.58  | 1.16  |
| 932 | zheng he xian   | No | 4.98  | 0.21  | 4.84  |
| 933 | shao wu shi     | No | 0.80  | 0.43  | 0.53  |
| 934 | wu yi shan shi  | No | 12.36 | 10.79 | 1.58  |
| 935 | jian ou shi     | No | 0.22  | 0.17  | 0.05  |
| 936 | jian yang shi   | No | 4.50  | 3.78  | 0.72  |
| 937 | xin luo qu      | No | 2.10  | 1.23  | 0.86  |
| 938 | zhang ting xian | No | 3.82  | 3.29  | 0.52  |
| 939 | yong ding xian  | No | 1.62  | 0.04  | 1.60  |
| 940 | shang hang xian | No | 4.97  | 3.19  | 1.77  |
| 941 | wu ping xian    | No | 7.23  | 6.33  | 0.91  |
| 942 | lian cheng xian | No | 8.02  | 3.77  | 4.25  |
| 943 | zhang ping shi  | No | 2.30  | 0.23  | 2.07  |
| 944 | jiao cheng qu   | No | 9.73  | 6.73  | 3.55  |
| 945 | xia pu xian     | No | 1.56  | 1.15  | 0.67  |
| 946 | gu tian xian    | No | 3.65  | 2.01  | 2.97  |
| 947 | ping nan xian   | No | 10.65 | 5.57  | 6.27  |
| 948 | shou ning xian  | No | 7.80  | 3.21  | 5.47  |
| 949 | zhou ning xian  | No | 8.41  | 6.45  | 2.08  |
| 950 | zhe rong xian   | No | 1.97  | 1.97  | 0.00  |
| 951 | fu an shi       | No | 6.07  | 1.81  | 4.40  |
| 952 | fu ding shi     | No | 10.33 | 7.45  | 4.32  |
| 953 | dong hu qu      | No | 0.00  | 0.00  | 0.00  |
| 954 | xi hu qu        | No | 83.50 | 0.00  | 83.50 |
| 955 | qing yun pu qu  | No | 0.00  | 0.00  | 0.00  |
| 956 | wan li qu       | No | 41.77 | 3.00  | 39.84 |
| 957 | qing shan hu qu | No | 0.22  | 0.00  | 0.22  |
| 958 | nan chang xian  | No | 8.09  | 7.92  | 0.18  |
| 959 | xin jian xian   | No | 23.91 | 22.03 | 2.11  |
| 960 | an yi xian      | No | 35.72 | 34.49 | 6.45  |
| 961 | jin xian xian   | No | 26.08 | 25.37 | 14.12 |
| 962 | chang jiang qu  | No | 13.27 | 0.00  | 13.27 |
| 963 | zhu shan qu     | No | 0.00  | 0.00  | 0.00  |
| 964 | fu liang xian   | No | 15.14 | 13.95 | 2.51  |
| 965 | le ping shi     | No | 3.35  | 2.85  | 2.04  |
| 966 | an yuan qu      | No | 19.99 | 0.00  | 19.99 |
| 967 | xiang dong qu   | No | 8.34  | 0.00  | 8.34  |
| 968 | shang li xian   | No | 9.06  | 0.00  | 9.06  |
| 969 | lu xi xian      | No | 20.36 | 10.42 | 18.16 |
| 970 | lu shan qu      | No | 43.80 | 28.96 | 34.52 |
| 971 | xun yang qu     | No | 0.00  | 0.00  | 0.00  |
| 972 | jiu jiang xian  | No | 2.32  | 0.88  | 2.23  |
| 973 | wu ning xian    | No | 30.73 | 7.50  | 24.78 |
| 974 | yong xiu xian   | No | 33.60 | 9.40  | 25.37 |
| 975 | de an xian      | No | 1.76  | 0.21  | 1.54  |
| 976 | xing zi xian    | No | 34.66 | 28.19 | 15.98 |
| 977 | dou chang xian  | No | 18.91 | 17.56 | 6.63  |

|      |                  |    |       |       |       |
|------|------------------|----|-------|-------|-------|
| 978  | hu kou xian      | No | 4.68  | 2.05  | 2.69  |
| 979  | peng ze xian     | No | 19.48 | 15.77 | 3.98  |
| 980  | rui chang shi    | No | 4.64  | 1.81  | 2.83  |
| 981  | yu shui qu       | No | 3.38  | 0.33  | 3.05  |
| 982  | fen yi xian      | No | 3.26  | 1.61  | 2.13  |
| 983  | yue hu qu        | No | 6.26  | 0.00  | 6.26  |
| 984  | yu jiang xian    | No | 4.01  | 0.34  | 3.68  |
| 985  | gui xi shi       | No | 15.69 | 6.17  | 10.25 |
| 986  | zhang gong qu    | No | 31.43 | 23.06 | 31.43 |
| 987  | xin feng xian    | No | 3.83  | 1.30  | 3.59  |
| 988  | da yu xian       | No | 5.65  | 1.90  | 5.32  |
| 989  | chong yi xian    | No | 23.75 | 22.07 | 11.69 |
| 990  | long nan xian    | No | 23.59 | 17.90 | 13.65 |
| 991  | ding nan xian    | No | 3.36  | 2.60  | 0.76  |
| 992  | quan nan xian    | No | 7.66  | 6.94  | 0.78  |
| 993  | ji zhou qu       | No | 2.14  | 0.01  | 2.12  |
| 994  | qing yuan qu     | No | 6.24  | 1.48  | 4.77  |
| 995  | ji shui xian     | No | 1.26  | 0.31  | 0.95  |
| 996  | xia jiang xian   | No | 2.35  | 1.24  | 1.81  |
| 997  | xin gan xian     | No | 1.88  | 1.06  | 0.82  |
| 998  | yong feng xian   | No | 2.93  | 0.77  | 2.90  |
| 999  | tai he xian      | No | 3.63  | 2.17  | 1.46  |
| 1000 | an fu xian       | No | 10.39 | 1.17  | 9.22  |
| 1001 | yuan zhou qu     | No | 5.49  | 0.50  | 5.49  |
| 1002 | feng xin xian    | No | 3.06  | 2.49  | 0.57  |
| 1003 | wan zai xian     | No | 4.79  | 3.49  | 3.02  |
| 1004 | shang gao xian   | No | 1.68  | 0.42  | 1.25  |
| 1005 | yi feng xian     | No | 3.97  | 2.70  | 2.41  |
| 1006 | jing an xian     | No | 19.40 | 11.49 | 8.94  |
| 1007 | tong gu xian     | No | 19.25 | 5.81  | 15.34 |
| 1008 | feng cheng shi   | No | 1.48  | 0.09  | 1.39  |
| 1009 | zhang shu shi    | No | 5.45  | 0.00  | 5.45  |
| 1010 | gao an shi       | No | 1.50  | 0.14  | 1.37  |
| 1011 | lin chuan qu     | No | 1.99  | 1.07  | 0.91  |
| 1012 | nan cheng xian   | No | 10.27 | 2.26  | 8.03  |
| 1013 | li chuan xian    | No | 8.00  | 6.35  | 3.61  |
| 1014 | nan feng xian    | No | 3.90  | 2.13  | 2.54  |
| 1015 | chong ren xian   | No | 1.01  | 0.36  | 0.65  |
| 1016 | yi huang xian    | No | 12.67 | 12.23 | 0.45  |
| 1017 | jin xi xian      | No | 7.50  | 6.43  | 1.07  |
| 1018 | zi xi xian       | No | 16.19 | 13.10 | 3.11  |
| 1019 | xin zhou qu      | No | 7.19  | 0.00  | 7.19  |
| 1020 | guang feng xian  | No | 15.22 | 7.74  | 15.22 |
| 1021 | yu shan xian     | No | 16.32 | 2.57  | 13.75 |
| 1022 | qian shan xian   | No | 11.07 | 7.22  | 4.40  |
| 1023 | yi yang xian     | No | 5.51  | 0.00  | 5.51  |
| 1024 | wan nian xian    | No | 5.73  | 0.00  | 5.73  |
| 1025 | wu yuan xian     | No | 9.68  | 8.37  | 1.33  |
| 1026 | de xing shi      | No | 2.53  | 0.22  | 2.31  |
| 1027 | li xia qu        | No | 1.79  | 0.00  | 1.79  |
| 1028 | shi zhong qu     | No | 10.02 | 2.81  | 7.46  |
| 1029 | huai yin qu      | No | 0.81  | 0.00  | 0.81  |
| 1030 | tian qiao qu     | No | 2.53  | 0.00  | 2.53  |
| 1031 | li cheng qu      | No | 8.71  | 2.67  | 7.77  |
| 1032 | zhang qing qu    | No | 7.78  | 2.20  | 7.70  |
| 1033 | ping yin xian    | No | 3.21  | 1.67  | 2.79  |
| 1034 | ji yang xian     | No | 0.57  | 0.00  | 0.57  |
| 1035 | shang he xian    | No | 2.40  | 0.00  | 2.40  |
| 1036 | zhang qiu shi    | No | 5.41  | 0.02  | 5.41  |
| 1037 | shi nan qu       | No | 25.17 | 25.17 | 0.00  |
| 1038 | shi bei qu       | No | 0.00  | 0.00  | 0.00  |
| 1039 | si fang qu       | No | 0.00  | 0.00  | 0.00  |
| 1040 | huang dao qu     | No | 24.57 | 4.72  | 19.85 |
| 1041 | lao shan qu      | No | 17.59 | 15.53 | 5.77  |
| 1042 | li cang qu       | No | 2.34  | 0.01  | 2.33  |
| 1043 | cheng yang qu    | No | 30.83 | 8.22  | 23.77 |
| 1044 | jiao zhou shi    | No | 3.32  | 0.64  | 2.68  |
| 1045 | ji mo shi        | No | 0.31  | 0.29  | 0.14  |
| 1046 | ping du shi      | No | 3.09  | 3.08  | 0.18  |
| 1047 | jiao nan shi     | No | 14.98 | 1.38  | 13.60 |
| 1048 | lai xi shi       | No | 0.92  | 0.00  | 0.92  |
| 1049 | zi chuan qu      | No | 7.66  | 0.23  | 7.45  |
| 1050 | zhang dian qu    | No | 0.04  | 0.00  | 0.04  |
| 1051 | bo shan qu       | No | 34.42 | 33.92 | 8.64  |
| 1052 | lin zi qu        | No | 0.61  | 0.00  | 0.61  |
| 1053 | zhou cun qu      | No | 1.42  | 0.00  | 1.42  |
| 1054 | huan tai xian    | No | 2.37  | 0.00  | 2.37  |
| 1055 | gao qing xian    | No | 0.46  | 0.00  | 0.46  |
| 1056 | yi yuan xian     | No | 3.45  | 1.93  | 3.05  |
| 1057 | shi zhong qu     | No | 7.59  | 2.12  | 5.64  |
| 1058 | xue cheng qu     | No | 3.25  | 1.66  | 1.64  |
| 1059 | yi cheng qu      | No | 6.51  | 4.82  | 4.72  |
| 1060 | tai er zhuang qu | No | 7.08  | 0.07  | 7.04  |
| 1061 | shan ting qu     | No | 16.93 | 2.64  | 16.29 |
| 1062 | teng zhou shi    | No | 6.96  | 0.07  | 6.94  |
| 1063 | dong ying qu     | No | 2.53  | 0.00  | 2.53  |
| 1064 | he kou qu        | No | 15.29 | 13.94 | 15.29 |
| 1065 | ken li xian      | No | 41.74 | 40.49 | 41.74 |
| 1066 | li jin xian      | No | 2.03  | 0.00  | 2.03  |
| 1067 | guang rao xian   | No | 2.99  | 0.00  | 2.99  |
| 1068 | zhi fu qu        | No | 23.81 | 20.33 | 3.47  |
| 1069 | fu shan qu       | No | 8.51  | 7.84  | 0.86  |
| 1070 | mou ping qu      | No | 11.62 | 9.98  | 4.81  |
| 1071 | lai shan qu      | No | 8.91  | 6.42  | 2.65  |
| 1072 | zhang dao xian   | No | 71.78 | 66.02 | 33.40 |
| 1073 | long kou shi     | No | 15.52 | 11.85 | 5.54  |
| 1074 | lai yang shi     | No | 5.11  | 3.13  | 1.99  |
| 1075 | lai zhou shi     | No | 5.94  | 5.94  | 0.28  |
| 1076 | peng lai shi     | No | 12.69 | 6.57  | 7.81  |
| 1077 | zhao yuan shi    | No | 8.47  | 6.77  | 2.39  |
| 1078 | qi xia shi       | No | 11.37 | 9.82  | 8.00  |
| 1079 | hai yang shi     | No | 5.67  | 4.66  | 1.86  |
| 1080 | wei cheng qu     | No | 0.61  | 0.00  | 0.61  |
| 1081 | han ting qu      | No | 4.99  | 0.00  | 4.99  |
| 1082 | fang zi qu       | No | 0.02  | 0.00  | 0.02  |
| 1083 | kui wen qu       | No | 0.00  | 0.00  | 0.00  |
| 1084 | lin qu xian      | No | 9.31  | 0.07  | 9.31  |
| 1085 | chang le xian    | No | 5.60  | 0.00  | 5.60  |
| 1086 | qing zhou shi    | No | 6.82  | 1.28  | 6.82  |

|      |                      |    |       |       |       |
|------|----------------------|----|-------|-------|-------|
| 1087 | zhu cheng shi        | No | 3.28  | 0.00  | 3.28  |
| 1088 | shou guang shi       | No | 1.44  | 0.00  | 1.44  |
| 1089 | an qiu shi           | No | 5.28  | 0.00  | 5.28  |
| 1090 | gao mi shi           | No | 3.70  | 0.00  | 3.70  |
| 1091 | chang yi shi         | No | 8.83  | 0.00  | 8.83  |
| 1092 | shi zhong qu         | No | 75.37 | 21.10 | 56.06 |
| 1093 | ren cheng qu         | No | 0.30  | 0.06  | 0.24  |
| 1094 | wei shan xian        | No | 62.68 | 62.41 | 1.57  |
| 1095 | yu tai xian          | No | 1.69  | 0.84  | 0.85  |
| 1096 | jin xiang xian       | No | 2.35  | 0.00  | 2.35  |
| 1097 | jia xiang xian       | No | 2.85  | 0.00  | 2.85  |
| 1098 | wen shang xian       | No | 2.03  | 0.00  | 2.03  |
| 1099 | si shui xian         | No | 6.87  | 0.26  | 6.83  |
| 1100 | liang shan xian      | No | 2.89  | 0.00  | 2.89  |
| 1101 | qu fu shi            | No | 3.43  | 0.00  | 3.43  |
| 1102 | yan zhou shi         | No | 0.89  | 0.00  | 0.89  |
| 1103 | zou cheng shi        | No | 10.02 | 6.76  | 4.84  |
| 1104 | tai shan qu          | No | 26.49 | 15.53 | 26.49 |
| 1105 | dai yue qu           | No | 8.98  | 7.22  | 7.90  |
| 1106 | ning yang xian       | No | 4.51  | 0.00  | 4.51  |
| 1107 | dong ping xian       | No | 21.60 | 21.00 | 2.26  |
| 1108 | xin tai shi          | No | 5.61  | 3.01  | 3.59  |
| 1109 | fei cheng shi        | No | 3.21  | 0.00  | 3.21  |
| 1110 | huan cui qu          | No | 11.02 | 0.03  | 10.99 |
| 1111 | wen deng shi         | No | 7.89  | 4.33  | 4.28  |
| 1112 | rong cheng shi       | No | 7.66  | 2.88  | 4.78  |
| 1113 | ru shan shi          | No | 5.34  | 1.64  | 4.70  |
| 1114 | dong gang qu         | No | 17.13 | 0.00  | 17.13 |
| 1115 | lan shan qu          | No | 17.88 | 16.20 | 1.68  |
| 1116 | wu lian xian         | No | 6.01  | 0.00  | 6.01  |
| 1117 | ju xian              | No | 1.54  | 0.14  | 1.40  |
| 1118 | lai cheng qu         | No | 7.93  | 1.58  | 7.63  |
| 1119 | gang cheng qu        | No | 6.25  | 0.00  | 6.25  |
| 1120 | lan shan qu          | No | 1.74  | 0.00  | 1.74  |
| 1121 | luo zhuang qu        | No | 0.40  | 0.01  | 0.40  |
| 1122 | he dong qu           | No | 2.98  | 0.00  | 2.98  |
| 1123 | yi nan xian          | No | 6.59  | 4.53  | 3.35  |
| 1124 | tan cheng xian       | No | 8.97  | 4.66  | 4.31  |
| 1125 | yi shui xian         | No | 4.70  | 2.78  | 2.82  |
| 1126 | cang shan xian       | No | 2.49  | 2.29  | 1.57  |
| 1127 | fei xian             | No | 5.10  | 2.07  | 3.07  |
| 1128 | ping yi xian         | No | 10.52 | 7.55  | 8.12  |
| 1129 | ju nan xian          | No | 3.91  | 2.37  | 1.54  |
| 1130 | meng yin xian        | No | 10.16 | 1.70  | 9.81  |
| 1131 | lin shu xian         | No | 6.13  | 2.86  | 4.27  |
| 1132 | de cheng qu          | No | 3.40  | 0.00  | 3.40  |
| 1133 | ling xian            | No | 0.87  | 0.00  | 0.87  |
| 1134 | ning jin xian        | No | 0.00  | 0.00  | 0.00  |
| 1135 | qing yun xian        | No | 1.59  | 0.00  | 1.59  |
| 1136 | lin yi xian          | No | 0.92  | 0.00  | 0.92  |
| 1137 | qi he xian           | No | 0.92  | 0.00  | 0.92  |
| 1138 | ping yuan xian       | No | 1.60  | 0.00  | 1.60  |
| 1139 | xia jin xian         | No | 3.45  | 0.00  | 3.45  |
| 1140 | wu cheng xian        | No | 2.63  | 0.00  | 2.63  |
| 1141 | le ling shi          | No | 2.58  | 0.00  | 2.58  |
| 1142 | yu cheng shi         | No | 1.30  | 0.00  | 1.30  |
| 1143 | dong chang fu qu     | No | 0.41  | 0.00  | 0.41  |
| 1144 | yang gu xian         | No | 0.34  | 0.02  | 0.32  |
| 1145 | shen xian            | No | 2.71  | 2.71  | 0.00  |
| 1146 | chi ping xian        | No | 2.32  | 0.00  | 2.32  |
| 1147 | dong a xian          | No | 8.59  | 6.61  | 3.02  |
| 1148 | guan xian            | No | 10.10 | 9.71  | 0.39  |
| 1149 | gao tang xian        | No | 4.44  | 4.44  | 0.00  |
| 1150 | lin qing shi         | No | 0.05  | 0.00  | 0.05  |
| 1151 | bin cheng qu         | No | 1.99  | 0.00  | 1.99  |
| 1152 | hui min xian         | No | 0.37  | 0.00  | 0.37  |
| 1153 | yang xin xian        | No | 0.31  | 0.00  | 0.31  |
| 1154 | wu di xian           | No | 16.35 | 15.82 | 0.54  |
| 1155 | zhan hua xian        | No | 0.89  | 0.00  | 0.89  |
| 1156 | bo xing xian         | No | 4.10  | 0.34  | 4.10  |
| 1157 | zou ping xian        | No | 1.15  | 0.00  | 1.15  |
| 1158 | mu dan qu            | No | 1.41  | 0.41  | 1.00  |
| 1159 | cao xian             | No | 0.47  | 0.00  | 0.47  |
| 1160 | dan xian             | No | 2.19  | 0.06  | 2.13  |
| 1161 | cheng wu xian        | No | 1.92  | 0.00  | 1.92  |
| 1162 | ju ye xian           | No | 0.85  | 0.00  | 0.85  |
| 1163 | yun cheng xian       | No | 0.36  | 0.00  | 0.36  |
| 1164 | juan cheng xian      | No | 0.41  | 0.00  | 0.41  |
| 1165 | ding tao xian        | No | 1.64  | 0.00  | 1.64  |
| 1166 | dong ming xian       | No | 2.39  | 1.70  | 0.69  |
| 1167 | zhong yuan qu        | No | 0.00  | 0.00  | 0.00  |
| 1168 | er qi qu             | No | 0.00  | 0.00  | 0.00  |
| 1169 | guan cheng hui zu qu | No | 0.00  | 0.00  | 0.00  |
| 1170 | jin shui qu          | No | 3.24  | 2.30  | 0.94  |
| 1171 | shang jie qu         | No | 0.00  | 0.00  | 0.00  |
| 1172 | hui ji qu            | No | 34.00 | 19.38 | 23.75 |
| 1173 | zhong mou xian       | No | 9.46  | 7.73  | 1.73  |
| 1174 | gong yi shi          | No | 10.94 | 6.23  | 4.71  |
| 1175 | ying yang shi        | No | 15.40 | 10.85 | 4.94  |
| 1176 | xin mi shi           | No | 6.47  | 0.00  | 6.47  |
| 1177 | xin zheng shi        | No | 3.00  | 0.00  | 3.00  |
| 1178 | deng feng shi        | No | 21.51 | 0.00  | 21.51 |
| 1179 | kai feng shi qu      | No | 10.86 | 9.69  | 1.17  |
| 1180 | qi xian              | No | 0.00  | 0.00  | 0.00  |
| 1181 | tong xu xian         | No | 0.00  | 0.00  | 0.00  |
| 1182 | wei shi xian         | No | 0.34  | 0.00  | 0.34  |
| 1183 | kai feng xian        | No | 5.09  | 4.85  | 0.24  |
| 1184 | lao cheng qu         | No | 0.00  | 0.00  | 0.00  |
| 1185 | xi gong qu           | No | 0.00  | 0.00  | 0.00  |
| 1186 | chan he hui zu qu    | No | 0.00  | 0.00  | 0.00  |
| 1187 | jian xi qu           | No | 8.34  | 0.00  | 8.34  |
| 1188 | ji li qu             | No | 32.21 | 32.21 | 0.00  |
| 1189 | luo long qu          | No | 0.29  | 0.00  | 0.29  |
| 1190 | meng jin xian        | No | 12.78 | 12.07 | 0.71  |
| 1191 | xin an xian          | No | 17.85 | 5.61  | 14.94 |
| 1192 | yi chuan xian        | No | 1.65  | 0.00  | 1.65  |
| 1193 | yan shi shi          | No | 6.18  | 0.00  | 6.18  |
| 1194 | xin hua qu           | No | 31.33 | 27.37 | 3.97  |
| 1195 | wei dong qu          | No | 11.20 | 0.00  | 11.20 |

|      |                   |    |       |       |       |
|------|-------------------|----|-------|-------|-------|
| 1196 | shi long qu       | No | 0.00  | 0.00  | 0.00  |
| 1197 | zhan he qu        | No | 1.21  | 1.21  | 0.00  |
| 1198 | bao feng xian     | No | 0.08  | 0.00  | 0.08  |
| 1199 | ye xian           | No | 0.77  | 0.00  | 0.77  |
| 1200 | jia xian          | No | 0.06  | 0.00  | 0.06  |
| 1201 | wu gang shi       | No | 10.89 | 0.00  | 10.89 |
| 1202 | ru zhou shi       | No | 11.95 | 0.00  | 11.95 |
| 1203 | wen feng qu       | No | 0.00  | 0.00  | 0.00  |
| 1204 | bei guan qu       | No | 0.00  | 0.00  | 0.00  |
| 1205 | yin dou qu        | No | 0.00  | 0.00  | 0.00  |
| 1206 | long an qu        | No | 2.13  | 0.00  | 2.13  |
| 1207 | an yang xian      | No | 2.38  | 0.03  | 2.35  |
| 1208 | tang yin xian     | No | 0.96  | 0.00  | 0.96  |
| 1209 | nei huang xian    | No | 0.37  | 0.00  | 0.37  |
| 1210 | lin zhou shi      | No | 18.94 | 4.17  | 16.08 |
| 1211 | he shan qu        | No | 17.77 | 0.00  | 17.77 |
| 1212 | shan cheng qu     | No | 1.54  | 0.00  | 1.54  |
| 1213 | qi bin qu         | No | 3.95  | 0.00  | 3.95  |
| 1214 | xun xian          | No | 0.01  | 0.00  | 0.01  |
| 1215 | qi xian           | No | 23.59 | 0.00  | 23.59 |
| 1216 | hong qi qu        | No | 0.00  | 0.00  | 0.00  |
| 1217 | wei bin qu        | No | 0.00  | 0.00  | 0.00  |
| 1218 | feng quan qu      | No | 6.98  | 0.00  | 6.98  |
| 1219 | mu ye qu          | No | 0.00  | 0.00  | 0.00  |
| 1220 | xin xiang xian    | No | 0.00  | 0.00  | 0.00  |
| 1221 | huo jia xian      | No | 0.00  | 0.00  | 0.00  |
| 1222 | yuan yang xian    | No | 2.50  | 1.84  | 0.70  |
| 1223 | yan jin xian      | No | 2.58  | 0.00  | 2.58  |
| 1224 | zhang yuan xian   | No | 5.58  | 5.58  | 0.00  |
| 1225 | wei hui shi       | No | 4.79  | 0.00  | 4.79  |
| 1226 | hui xian shi      | No | 10.96 | 5.44  | 9.39  |
| 1227 | jie fang qu       | No | 28.13 | 0.00  | 28.13 |
| 1228 | zhong zhan qu     | No | 22.76 | 9.07  | 16.57 |
| 1229 | ma cun qu         | No | 0.00  | 0.00  | 0.00  |
| 1230 | shan yang qu      | No | 0.08  | 0.00  | 0.08  |
| 1231 | xiu wu xian       | No | 25.98 | 7.19  | 25.41 |
| 1232 | bo ai xian        | No | 7.19  | 6.89  | 2.34  |
| 1233 | wu zhi xian       | No | 3.39  | 1.30  | 2.34  |
| 1234 | wen xian          | No | 3.01  | 3.01  | 0.00  |
| 1235 | qin yang shi      | No | 11.50 | 10.31 | 6.80  |
| 1236 | meng zhou shi     | No | 12.34 | 12.34 | 0.62  |
| 1237 | hua long qu       | No | 0.57  | 0.00  | 0.57  |
| 1238 | qing feng xian    | No | 0.00  | 0.00  | 0.00  |
| 1239 | nan le xian       | No | 1.07  | 0.00  | 1.07  |
| 1240 | pu yang xian      | No | 2.03  | 1.47  | 0.55  |
| 1241 | wei dou qu        | No | 0.00  | 0.00  | 0.00  |
| 1242 | xu chang xian     | No | 0.00  | 0.00  | 0.00  |
| 1243 | yan ling xian     | No | 0.59  | 0.00  | 0.59  |
| 1244 | xiang cheng xian  | No | 2.65  | 0.00  | 2.65  |
| 1245 | yu zhou shi       | No | 3.75  | 0.00  | 3.75  |
| 1246 | zhang ge shi      | No | 1.12  | 0.00  | 1.12  |
| 1247 | yuan hui qu       | No | 0.09  | 0.00  | 0.09  |
| 1248 | yan cheng qu      | No | 0.20  | 0.00  | 0.20  |
| 1249 | zhao ling qu      | No | 0.00  | 0.00  | 0.00  |
| 1250 | wu yang xian      | No | 0.70  | 0.00  | 0.70  |
| 1251 | lin ying xian     | No | 0.11  | 0.00  | 0.11  |
| 1252 | hu bin qu         | No | 9.23  | 9.23  | 0.00  |
| 1253 | mian chi xian     | No | 15.56 | 3.38  | 12.78 |
| 1254 | shan xian         | No | 6.89  | 1.83  | 5.06  |
| 1255 | yi ma shi         | No | 10.21 | 0.00  | 10.21 |
| 1256 | ling bao shi      | No | 13.39 | 9.04  | 6.34  |
| 1257 | wan cheng qu      | No | 0.46  | 0.00  | 0.46  |
| 1258 | wo long qu        | No | 2.45  | 0.00  | 2.45  |
| 1259 | fang cheng xian   | No | 2.45  | 0.00  | 2.45  |
| 1260 | xi xia xian       | No | 33.81 | 28.69 | 14.15 |
| 1261 | tang he xian      | No | 0.29  | 0.00  | 0.29  |
| 1262 | xin ye xian       | No | 0.00  | 0.00  | 0.00  |
| 1263 | deng zhou shi     | No | 1.38  | 0.00  | 1.38  |
| 1264 | liang yuan qu     | No | 1.75  | 0.00  | 1.75  |
| 1265 | sui yang qu       | No | 0.00  | 0.00  | 0.00  |
| 1266 | xia yi xian       | No | 0.23  | 0.00  | 0.23  |
| 1267 | yong cheng shi    | No | 0.85  | 0.00  | 0.85  |
| 1268 | shi he qu         | No | 24.40 | 22.52 | 2.22  |
| 1269 | ping qiao qu      | No | 4.88  | 3.53  | 3.46  |
| 1270 | luo shan xian     | No | 26.82 | 26.82 | 0.00  |
| 1271 | xi xian           | No | 1.40  | 0.00  | 1.40  |
| 1272 | chuan hui qu      | No | 0.81  | 0.00  | 0.81  |
| 1273 | fu gou xian       | No | 0.01  | 0.00  | 0.01  |
| 1274 | xi hua xian       | No | 0.07  | 0.00  | 0.07  |
| 1275 | lu yi xian        | No | 1.05  | 0.00  | 1.05  |
| 1276 | xiang cheng shi   | No | 1.07  | 0.00  | 1.07  |
| 1277 | yi cheng qu       | No | 7.83  | 1.65  | 6.18  |
| 1278 | xi ping xian      | No | 3.28  | 0.00  | 3.28  |
| 1279 | zheng yang xian   | No | 0.00  | 0.00  | 0.00  |
| 1280 | mi yang xian      | No | 6.13  | 0.01  | 6.12  |
| 1281 | ru nan xian       | No | 10.30 | 10.30 | 0.00  |
| 1282 | sui ping xian     | No | 5.69  | 0.00  | 5.69  |
| 1283 | ji yuan shi       | No | 23.64 | 18.30 | 12.84 |
| 1284 | jiang an qu       | No | 0.00  | 0.00  | 0.00  |
| 1285 | jiang han qu      | No | 0.00  | 0.00  | 0.00  |
| 1286 | qiao kou qu       | No | 0.00  | 0.00  | 0.00  |
| 1287 | han yang qu       | No | 0.00  | 0.00  | 0.00  |
| 1288 | wu chang qu       | No | 0.07  | 0.00  | 0.07  |
| 1289 | qing shan qu      | No | 0.00  | 0.00  | 0.00  |
| 1290 | hong shan qu      | No | 2.17  | 0.00  | 2.17  |
| 1291 | dong xi hu qu     | No | 1.90  | 0.00  | 1.90  |
| 1292 | han nan qu        | No | 10.99 | 10.11 | 0.91  |
| 1293 | cai dian qu       | No | 16.88 | 10.29 | 6.59  |
| 1294 | jiang xia qu      | No | 3.99  | 2.08  | 1.98  |
| 1295 | huang bei qu      | No | 4.95  | 0.50  | 4.45  |
| 1296 | xin zhou qu       | No | 5.48  | 5.36  | 0.13  |
| 1297 | huang shi gang qu | No | 11.83 | 0.00  | 11.83 |
| 1298 | xi sai shan qu    | No | 12.73 | 0.00  | 12.73 |
| 1299 | xia lu qu         | No | 14.35 | 0.00  | 14.35 |
| 1300 | tie shan qu       | No | 36.42 | 0.00  | 36.42 |
| 1301 | da ye shi         | No | 3.76  | 0.04  | 3.73  |
| 1302 | mao jian qu       | No | 41.64 | 39.39 | 2.26  |
| 1303 | zhang wan qu      | No | 21.11 | 10.84 | 10.27 |
| 1304 | xi ling qu        | No | 21.31 | 3.94  | 17.37 |

|      |                 |    |       |       |       |
|------|-----------------|----|-------|-------|-------|
| 1305 | wu jia gang qu  | No | 9.68  | 9.65  | 0.04  |
| 1306 | dian jun1 qu    | No | 2.24  | 1.98  | 0.26  |
| 1307 | xiao ting qu    | No | 9.17  | 9.17  | 0.00  |
| 1308 | yi ling qu      | No | 11.54 | 3.89  | 9.26  |
| 1309 | yuan an xian    | No | 6.10  | 3.96  | 2.14  |
| 1310 | xing shan xian  | No | 9.12  | 9.08  | 2.16  |
| 1311 | yi dou shi      | No | 3.45  | 1.40  | 2.05  |
| 1312 | dang yang shi   | No | 6.18  | 0.00  | 6.18  |
| 1313 | zhi jiang shi   | No | 1.91  | 1.16  | 0.75  |
| 1314 | xiang cheng qu  | No | 7.50  | 0.00  | 7.50  |
| 1315 | fan cheng qu    | No | 4.78  | 0.00  | 4.78  |
| 1316 | xiang zhou qu   | No | 1.60  | 0.01  | 1.59  |
| 1317 | nan zhang xian  | No | 8.75  | 7.54  | 2.84  |
| 1318 | gu cheng xian   | No | 9.06  | 6.21  | 2.85  |
| 1319 | lao he kou shi  | No | 4.74  | 3.14  | 1.60  |
| 1320 | zao yang shi    | No | 2.62  | 1.30  | 2.62  |
| 1321 | yi cheng shi    | No | 7.40  | 5.94  | 2.62  |
| 1322 | liang zi hu qu  | No | 69.63 | 69.44 | 1.18  |
| 1323 | hua rong qu     | No | 0.35  | 0.00  | 0.35  |
| 1324 | e cheng qu      | No | 1.64  | 0.00  | 1.64  |
| 1325 | dong bao qu     | No | 7.17  | 0.00  | 7.17  |
| 1326 | duo dao qu      | No | 1.01  | 0.00  | 1.01  |
| 1327 | jing shan xian  | No | 7.16  | 0.92  | 6.63  |
| 1328 | sha yang xian   | No | 4.09  | 3.81  | 0.28  |
| 1329 | zhong xiang shi | No | 9.92  | 1.80  | 8.13  |
| 1330 | xiao nan qu     | No | 4.52  | 0.00  | 4.52  |
| 1331 | yun meng xian   | No | 1.91  | 0.00  | 1.91  |
| 1332 | ying cheng shi  | No | 0.94  | 0.44  | 0.94  |
| 1333 | an lu shi       | No | 3.33  | 1.74  | 2.94  |
| 1334 | han chuan shi   | No | 1.74  | 0.07  | 1.74  |
| 1335 | sha shi qu      | No | 13.89 | 13.82 | 0.07  |
| 1336 | jing zhou qu    | No | 5.96  | 3.76  | 2.20  |
| 1337 | gong an xian    | No | 2.18  | 0.26  | 1.93  |
| 1338 | jian li xian    | No | 4.27  | 3.50  | 0.77  |
| 1339 | jiang ling xian | No | 0.05  | 0.00  | 0.05  |
| 1340 | shi shou shi    | No | 16.35 | 15.51 | 0.84  |
| 1341 | hong hu shi     | No | 22.97 | 22.57 | 0.40  |
| 1342 | song zi shi     | No | 13.07 | 0.00  | 13.07 |
| 1343 | huang zhou qu   | No | 4.13  | 0.00  | 4.13  |
| 1344 | xi shui xian    | No | 4.93  | 0.00  | 4.93  |
| 1345 | huang mei xian  | No | 13.45 | 13.09 | 0.36  |
| 1346 | wu xue shi      | No | 6.53  | 0.00  | 6.53  |
| 1347 | xian an qu      | No | 6.32  | 0.69  | 5.63  |
| 1348 | jia yu xian     | No | 18.89 | 17.14 | 1.75  |
| 1349 | tong cheng xian | No | 11.54 | 10.38 | 1.17  |
| 1350 | chong yang xian | No | 3.00  | 0.03  | 2.97  |
| 1351 | tong shan xian  | No | 15.43 | 7.43  | 8.27  |
| 1352 | chi bi shi      | No | 14.38 | 6.63  | 7.76  |
| 1353 | ceng dou qu     | No | 5.93  | 2.26  | 4.72  |
| 1354 | guang shui shi  | No | 6.78  | 4.81  | 4.38  |
| 1355 | xian tao shi    | No | 1.06  | 0.04  | 1.01  |
| 1356 | qian jiang shi  | No | 0.45  | 0.01  | 0.44  |
| 1357 | tian men shi    | No | 0.73  | 0.31  | 0.42  |
| 1358 | fu rong qu      | No | 0.00  | 0.00  | 0.00  |
| 1359 | tian xin qu     | No | 0.00  | 0.00  | 0.00  |
| 1360 | yue lu qu       | No | 3.06  | 0.00  | 3.06  |
| 1361 | kai fu qu       | No | 3.67  | 0.00  | 3.67  |
| 1362 | yu hua qu       | No | 1.00  | 0.00  | 1.00  |
| 1363 | zhang sha xian  | No | 2.75  | 0.00  | 2.75  |
| 1364 | wang cheng xian | No | 3.93  | 0.00  | 3.93  |
| 1365 | ning xiang xian | No | 1.43  | 0.18  | 1.25  |
| 1366 | liu yang shi    | No | 3.40  | 2.56  | 2.52  |
| 1367 | he tang qu      | No | 8.01  | 0.00  | 8.01  |
| 1368 | lu song qu      | No | 0.00  | 0.00  | 0.00  |
| 1369 | shi feng qu     | No | 6.59  | 0.00  | 6.59  |
| 1370 | tian yuan qu    | No | 0.00  | 0.00  | 0.00  |
| 1371 | zhu zhou xian   | No | 2.50  | 2.49  | 0.01  |
| 1372 | you xian        | No | 6.98  | 0.78  | 6.98  |
| 1373 | li ling shi     | No | 1.17  | 0.00  | 1.17  |
| 1374 | yu hu qu        | No | 0.00  | 0.00  | 0.00  |
| 1375 | yue tang qu     | No | 4.18  | 0.00  | 4.18  |
| 1376 | xiang tan xian  | No | 2.06  | 1.77  | 0.30  |
| 1377 | xiang xiang shi | No | 6.18  | 1.01  | 5.16  |
| 1378 | shao shan shi   | No | 0.00  | 0.00  | 0.00  |
| 1379 | zhu hui qu      | No | 0.00  | 0.00  | 0.00  |
| 1380 | yan feng qu     | No | 0.00  | 0.00  | 0.00  |
| 1381 | shi gu qu       | No | 3.69  | 0.00  | 3.69  |
| 1382 | zheng xiang qu  | No | 0.75  | 0.00  | 0.75  |
| 1383 | nan yue qu      | No | 78.06 | 50.69 | 58.52 |
| 1384 | heng yang xian  | No | 4.13  | 2.01  | 3.59  |
| 1385 | heng nan xian   | No | 1.64  | 0.79  | 1.53  |
| 1386 | heng shan xian  | No | 12.16 | 7.43  | 5.55  |
| 1387 | heng dong xian  | No | 8.22  | 5.99  | 2.63  |
| 1388 | qi dong xian    | No | 2.52  | 0.09  | 2.46  |
| 1389 | lei yang shi    | No | 5.99  | 0.01  | 5.99  |
| 1390 | chang ning shi  | No | 10.15 | 5.60  | 5.32  |
| 1391 | shuang qing qu  | No | 0.00  | 0.00  | 0.00  |
| 1392 | da xiang qu     | No | 0.21  | 0.00  | 0.21  |
| 1393 | bei ta qu       | No | 0.00  | 0.00  | 0.00  |
| 1394 | shao dong xian  | No | 0.01  | 0.00  | 0.01  |
| 1395 | yue yang lou qu | No | 13.20 | 11.53 | 1.67  |
| 1396 | yun xi qu       | No | 8.67  | 2.26  | 7.04  |
| 1397 | jun1 shan qu    | No | 68.94 | 68.94 | 1.25  |
| 1398 | yue yang xian   | No | 35.87 | 33.07 | 2.92  |
| 1399 | hua rong xian   | No | 13.86 | 7.61  | 6.31  |
| 1400 | xiang yin xian  | No | 27.22 | 25.36 | 1.86  |
| 1401 | mi luo shi      | No | 6.45  | 4.38  | 3.60  |
| 1402 | lin xiang shi   | No | 7.86  | 6.83  | 1.92  |
| 1403 | wu ling qu      | No | 0.98  | 0.00  | 0.98  |
| 1404 | ding cheng qu   | No | 2.98  | 0.38  | 2.96  |
| 1405 | an xiang xian   | No | 5.54  | 0.00  | 5.54  |
| 1406 | han shou xian   | No | 19.17 | 15.37 | 3.81  |
| 1407 | li xian         | No | 6.05  | 2.49  | 3.56  |
| 1408 | lin li xian     | No | 2.15  | 0.00  | 2.15  |
| 1409 | tao yuan xian   | No | 8.58  | 8.14  | 0.44  |
| 1410 | jin shi shi     | No | 18.20 | 3.47  | 14.73 |
| 1411 | yong ding qu    | No | 7.86  | 1.43  | 6.91  |
| 1412 | wu ling yuan qu | No | 90.69 | 36.28 | 89.96 |
| 1413 | zi yang qu      | No | 4.27  | 1.49  | 2.78  |

|      |                            |    |       |       |       |
|------|----------------------------|----|-------|-------|-------|
| 1414 | he shan qu                 | No | 2.59  | 0.00  | 2.59  |
| 1415 | nan xian                   | No | 15.05 | 1.55  | 14.72 |
| 1416 | tao jiang xian             | No | 2.64  | 0.00  | 2.64  |
| 1417 | yuan jiang shi             | No | 38.08 | 35.91 | 2.34  |
| 1418 | bei hu qu                  | No | 1.83  | 0.00  | 1.83  |
| 1419 | su xian qu                 | No | 12.42 | 3.70  | 8.75  |
| 1420 | gui yang xian              | No | 2.11  | 0.27  | 1.84  |
| 1421 | yong xing xian             | No | 6.04  | 1.05  | 6.04  |
| 1422 | jia he xian                | No | 7.62  | 0.00  | 7.62  |
| 1423 | lin wu xian                | No | 9.40  | 0.07  | 9.33  |
| 1424 | zi xing shi                | No | 22.42 | 0.47  | 22.17 |
| 1425 | ling ling qu               | No | 2.55  | 1.01  | 2.50  |
| 1426 | leng shui tan qu           | No | 4.79  | 0.00  | 4.79  |
| 1427 | qi yang xian               | No | 7.92  | 3.24  | 5.73  |
| 1428 | dong an xian               | No | 12.16 | 6.08  | 12.05 |
| 1429 | shuang pai xian            | No | 9.69  | 7.90  | 9.08  |
| 1430 | dao xian                   | No | 10.35 | 8.08  | 3.02  |
| 1431 | jiang yong xian            | No | 12.90 | 10.03 | 3.75  |
| 1432 | ning yuan xian             | No | 7.16  | 4.50  | 6.12  |
| 1433 | lan shan xian              | No | 4.34  | 2.58  | 4.26  |
| 1434 | he cheng qu                | No | 2.42  | 0.00  | 2.42  |
| 1435 | hong jiang shi             | No | 4.55  | 0.19  | 4.50  |
| 1436 | lou xing qu                | No | 11.59 | 0.00  | 11.59 |
| 1437 | shuang feng xian           | No | 5.74  | 0.00  | 5.74  |
| 1438 | leng shui jiang shi        | No | 2.11  | 0.00  | 2.11  |
| 1439 | ji shou shi                | No | 26.57 | 11.51 | 22.27 |
| 1440 | li wan qu                  | No | 0.11  | 0.00  | 0.11  |
| 1441 | yue xiu qu                 | No | 0.00  | 0.00  | 0.00  |
| 1442 | hai zhu qu                 | No | 9.45  | 0.00  | 9.45  |
| 1443 | tian he qu                 | No | 11.09 | 0.00  | 11.09 |
| 1444 | bai yun qu                 | No | 12.90 | 0.00  | 12.90 |
| 1445 | huang pu qu                | No | 3.36  | 0.00  | 3.36  |
| 1446 | fan yu qu                  | No | 2.39  | 0.00  | 2.39  |
| 1447 | hua dou qu                 | No | 9.58  | 0.30  | 9.58  |
| 1448 | nan sha qu                 | No | 2.93  | 0.00  | 2.93  |
| 1449 | luo gang qu                | No | 5.03  | 0.00  | 5.03  |
| 1450 | zeng cheng shi             | No | 10.17 | 0.26  | 10.11 |
| 1451 | cong hua shi               | No | 17.61 | 4.55  | 13.52 |
| 1452 | wu jiang qu                | No | 7.04  | 3.50  | 3.54  |
| 1453 | zhen jiang qu              | No | 15.75 | 11.44 | 13.98 |
| 1454 | qu jiang qu                | No | 26.05 | 16.13 | 9.92  |
| 1455 | shi xing xian              | No | 10.31 | 9.58  | 0.73  |
| 1456 | ren hua xian               | No | 22.78 | 19.29 | 14.22 |
| 1457 | weng yuan xian             | No | 6.90  | 5.25  | 1.70  |
| 1458 | ru yuan yao zu zi zhi xian | No | 36.06 | 30.80 | 12.92 |
| 1459 | xin feng xian              | No | 17.39 | 7.06  | 10.34 |
| 1460 | le chang shi               | No | 12.15 | 10.85 | 1.70  |
| 1461 | nan xiong shi              | No | 11.63 | 6.86  | 7.51  |
| 1462 | luo hu qu                  | No | 3.45  | 0.00  | 3.45  |
| 1463 | fu tian qu                 | No | 6.35  | 4.44  | 1.91  |
| 1464 | nan shan qu                | No | 30.37 | 27.66 | 2.71  |
| 1465 | bao an qu                  | No | 13.80 | 4.59  | 9.21  |
| 1466 | long gang qu               | No | 35.50 | 27.72 | 8.02  |
| 1467 | yan tian qu                | No | 22.21 | 0.00  | 22.21 |
| 1468 | xiang zhou qu              | No | 13.71 | 12.98 | 1.02  |
| 1469 | dou men qu                 | No | 7.15  | 4.27  | 6.34  |
| 1470 | jin wan qu                 | No | 3.94  | 0.87  | 3.07  |
| 1471 | long hu qu                 | No | 16.74 | 16.68 | 0.07  |
| 1472 | jin ping qu                | No | 20.05 | 19.90 | 0.15  |
| 1473 | hao jiang qu               | No | 6.87  | 6.87  | 0.00  |
| 1474 | chao yang qu               | No | 6.02  | 3.22  | 2.80  |
| 1475 | chao nan qu                | No | 7.44  | 2.79  | 6.04  |
| 1476 | cheng hai qu               | No | 5.79  | 5.79  | 0.00  |
| 1477 | nan ao xian                | No | 34.87 | 31.61 | 3.29  |
| 1478 | chan cheng qu              | No | 1.66  | 0.00  | 1.66  |
| 1479 | nan hai qu                 | No | 4.23  | 0.00  | 4.23  |
| 1480 | shun de qu                 | No | 1.81  | 0.00  | 1.81  |
| 1481 | san shui qu                | No | 10.40 | 0.00  | 10.40 |
| 1482 | gao ming qu                | No | 12.35 | 0.91  | 12.34 |
| 1483 | peng jiang qu              | No | 3.49  | 0.00  | 3.49  |
| 1484 | jiang hai qu               | No | 0.87  | 0.00  | 0.87  |
| 1485 | xin hui qu                 | No | 4.67  | 2.08  | 2.66  |
| 1486 | tai shan shi               | No | 7.30  | 5.15  | 2.15  |
| 1487 | kai ping shi               | No | 6.73  | 2.77  | 4.23  |
| 1488 | he shan shi                | No | 7.70  | 0.00  | 7.70  |
| 1489 | en ping shi                | No | 20.67 | 13.18 | 13.09 |
| 1490 | chi kan qu                 | No | 2.25  | 0.00  | 2.25  |
| 1491 | xia shan qu                | No | 18.52 | 5.11  | 17.39 |
| 1492 | po tou qu                  | No | 3.46  | 3.17  | 0.29  |
| 1493 | ma zhang qu                | No | 8.79  | 7.97  | 1.10  |
| 1494 | sui xi xian                | No | 4.27  | 1.15  | 3.12  |
| 1495 | xu wen xian                | No | 9.85  | 5.01  | 4.87  |
| 1496 | lian jiang shi             | No | 2.41  | 2.11  | 0.32  |
| 1497 | lei zhou shi               | No | 6.23  | 5.50  | 0.73  |
| 1498 | wu chuan shi               | No | 2.09  | 0.42  | 1.67  |
| 1499 | mao nan qu                 | No | 4.39  | 0.00  | 4.39  |
| 1500 | mao gang qu                | No | 4.18  | 3.42  | 1.19  |
| 1501 | dian bai xian              | No | 2.12  | 1.99  | 0.17  |
| 1502 | gao zhou shi               | No | 23.11 | 11.58 | 18.14 |
| 1503 | hua zhou shi               | No | 2.92  | 0.37  | 2.92  |
| 1504 | xin yi shi                 | No | 12.27 | 9.33  | 2.94  |
| 1505 | duan zhou qu               | No | 27.81 | 6.90  | 20.95 |
| 1506 | ding hu qu                 | No | 20.97 | 16.42 | 4.62  |
| 1507 | guang ning xian            | No | 12.88 | 1.28  | 12.82 |
| 1508 | huai ji xian               | No | 14.14 | 4.34  | 9.86  |
| 1509 | feng kai xian              | No | 16.12 | 3.54  | 13.69 |
| 1510 | de qing xian               | No | 8.65  | 1.03  | 7.62  |
| 1511 | gao yao shi                | No | 11.60 | 2.32  | 10.94 |
| 1512 | si hui shi                 | No | 12.64 | 2.04  | 10.61 |
| 1513 | hui cheng qu               | No | 6.17  | 3.07  | 3.11  |
| 1514 | hui yang qu                | No | 37.92 | 30.89 | 10.83 |
| 1515 | bo luo xian                | No | 11.24 | 7.82  | 3.45  |
| 1516 | hui dong xian              | No | 18.73 | 16.98 | 1.78  |
| 1517 | long men xian              | No | 7.90  | 4.34  | 3.85  |
| 1518 | mei jiang qu               | No | 14.46 | 10.48 | 3.99  |
| 1519 | mei xian                   | No | 9.40  | 7.86  | 1.71  |
| 1520 | da pu xian                 | No | 17.50 | 13.31 | 5.83  |
| 1521 | feng shun xian             | No | 15.24 | 6.87  | 9.77  |
| 1522 | wu hua xian                | No | 16.04 | 15.55 | 0.49  |

|      |                                        |    |       |       |       |
|------|----------------------------------------|----|-------|-------|-------|
| 1523 | ping yuan xian                         | No | 12.13 | 8.46  | 5.57  |
| 1524 | jiao ling xian                         | No | 17.97 | 13.43 | 5.38  |
| 1525 | xing ning shi                          | No | 17.95 | 12.16 | 6.99  |
| 1526 | cheng qu                               | No | 5.07  | 1.14  | 3.97  |
| 1527 | hai feng xian                          | No | 10.43 | 8.18  | 3.19  |
| 1528 | lu he xian                             | No | 9.34  | 4.47  | 5.80  |
| 1529 | lu feng shi                            | No | 0.98  | 0.51  | 0.47  |
| 1530 | yuan cheng qu                          | No | 26.99 | 19.88 | 11.21 |
| 1531 | zi jin xian                            | No | 12.73 | 11.89 | 1.41  |
| 1532 | long chuan xian                        | No | 13.29 | 10.97 | 2.34  |
| 1533 | lian ping xian                         | No | 9.89  | 5.51  | 4.77  |
| 1534 | he ping xian                           | No | 18.30 | 15.72 | 3.36  |
| 1535 | dong yuan xian                         | No | 28.09 | 25.93 | 9.25  |
| 1536 | yang xi xian                           | No | 12.75 | 1.34  | 11.42 |
| 1537 | yang dong xian                         | No | 6.55  | 0.87  | 5.78  |
| 1538 | yang chun shi                          | No | 13.15 | 4.90  | 11.41 |
| 1539 | qing cheng qu                          | No | 0.62  | 0.10  | 0.62  |
| 1540 | fo gang xian                           | No | 3.75  | 1.97  | 1.78  |
| 1541 | yang shan xian                         | No | 15.90 | 13.81 | 5.60  |
| 1542 | lian shan zhuang zu yao zu zi zhi xian | No | 18.32 | 15.09 | 5.65  |
| 1543 | lian nan yao zu zi zhi xian            | No | 11.72 | 9.66  | 2.07  |
| 1544 | qing xin xian                          | No | 9.31  | 8.25  | 2.40  |
| 1545 | ying de shi                            | No | 21.95 | 15.33 | 8.95  |
| 1546 | lian zhou shi                          | No | 12.25 | 7.99  | 4.33  |
| 1547 | dong wan shi                           | No | 14.61 | 3.59  | 13.46 |
| 1548 | zhong shan shi                         | No | 6.03  | 3.67  | 2.36  |
| 1549 | xiang qiao qu                          | No | 9.90  | 0.00  | 9.90  |
| 1550 | chao an xian                           | No | 4.45  | 3.16  | 1.29  |
| 1551 | rao ping xian                          | No | 7.51  | 4.94  | 2.58  |
| 1552 | rong cheng qu                          | No | 8.61  | 0.00  | 8.61  |
| 1553 | jie dong xian                          | No | 11.01 | 10.53 | 0.68  |
| 1554 | jie xi xian                            | No | 11.25 | 5.51  | 5.74  |
| 1555 | hui lai xian                           | No | 4.55  | 4.05  | 1.27  |
| 1556 | pu ning shi                            | No | 5.20  | 3.65  | 1.55  |
| 1557 | yun cheng qu                           | No | 6.55  | 0.14  | 6.41  |
| 1558 | xin xing xian                          | No | 10.82 | 3.37  | 9.25  |
| 1559 | yu nan xian                            | No | 6.29  | 5.02  | 3.42  |
| 1560 | yun an xian                            | No | 8.19  | 3.96  | 4.94  |
| 1561 | luo ding shi                           | No | 12.03 | 3.11  | 10.05 |
| 1562 | xing ning qu                           | No | 1.72  | 0.00  | 1.72  |
| 1563 | qing xiu qu                            | No | 0.00  | 0.00  | 0.00  |
| 1564 | jiang nan qu                           | No | 3.45  | 0.08  | 3.36  |
| 1565 | xi xiang tang qu                       | No | 1.80  | 1.47  | 0.33  |
| 1566 | liang qing qu                          | No | 3.65  | 0.27  | 3.38  |
| 1567 | yong ning qu                           | No | 0.00  | 0.00  | 0.00  |
| 1568 | wu ming xian                           | No | 5.99  | 5.89  | 0.10  |
| 1569 | bin yang xian                          | No | 0.30  | 0.00  | 0.30  |
| 1570 | heng xian                              | No | 1.00  | 0.01  | 1.00  |
| 1571 | cheng zhong qu                         | No | 6.31  | 0.00  | 6.31  |
| 1572 | yu feng qu                             | No | 0.00  | 0.00  | 0.00  |
| 1573 | liu nan qu                             | No | 0.00  | 0.00  | 0.00  |
| 1574 | liu bei qu                             | No | 1.40  | 0.00  | 1.40  |
| 1575 | liu jiang xian                         | No | 0.00  | 0.00  | 0.00  |
| 1576 | liu cheng xian                         | No | 0.00  | 0.00  | 0.00  |
| 1577 | lu zhai xian                           | No | 8.22  | 3.34  | 4.88  |
| 1578 | xiu feng qu                            | No | 0.35  | 0.00  | 0.35  |
| 1579 | die cai qu                             | No | 0.00  | 0.00  | 0.00  |
| 1580 | xiang shan qu                          | No | 6.05  | 0.00  | 6.05  |
| 1581 | yan shan qu                            | No | 0.00  | 0.00  | 0.00  |
| 1582 | yang shuo xian                         | No | 18.96 | 4.91  | 14.05 |
| 1583 | lin gui xian                           | No | 7.91  | 7.65  | 0.26  |
| 1584 | ling chuan xian                        | No | 27.55 | 24.30 | 4.02  |
| 1585 | quan zhou xian                         | No | 4.02  | 3.79  | 0.24  |
| 1586 | xing an xian                           | No | 7.09  | 7.09  | 0.07  |
| 1587 | yong fu xian                           | No | 29.38 | 29.38 | 0.00  |
| 1588 | guan yang xian                         | No | 18.45 | 16.62 | 2.04  |
| 1589 | ping le xian                           | No | 4.32  | 0.98  | 3.39  |
| 1590 | li pu xian                             | No | 11.81 | 11.42 | 0.40  |
| 1591 | gong cheng yao zu zi zhi xian          | No | 28.08 | 28.06 | 0.02  |
| 1592 | wan xiu qu                             | No | 0.00  | 0.00  | 0.00  |
| 1593 | die shan qu                            | No | 0.00  | 0.00  | 0.00  |
| 1594 | zhang zhou qu                          | No | 0.00  | 0.00  | 0.00  |
| 1595 | cang wu xian                           | No | 3.66  | 0.00  | 3.66  |
| 1596 | teng xian                              | No | 1.89  | 0.00  | 1.89  |
| 1597 | meng shan xian                         | No | 6.66  | 6.66  | 0.00  |
| 1598 | cen xi shi                             | No | 0.85  | 0.00  | 0.85  |
| 1599 | hai cheng qu                           | No | 0.00  | 0.00  | 0.00  |
| 1600 | yin hai qu                             | No | 5.67  | 2.07  | 4.59  |
| 1601 | tie shan gang qu                       | No | 0.00  | 0.00  | 0.00  |
| 1602 | he pu xian                             | No | 6.06  | 6.06  | 0.00  |
| 1603 | gang kou qu                            | No | 0.00  | 0.00  | 0.00  |
| 1604 | fang cheng qu                          | No | 12.28 | 12.28 | 0.00  |
| 1605 | shang si xian                          | No | 13.82 | 13.20 | 0.72  |
| 1606 | dong xing shi                          | No | 4.17  | 4.17  | 0.00  |
| 1607 | qin nan qu                             | No | 3.05  | 1.66  | 1.53  |
| 1608 | qin bei qu                             | No | 2.30  | 1.94  | 1.01  |
| 1609 | ling shan xian                         | No | 0.00  | 0.00  | 0.00  |
| 1610 | pu bei xian                            | No | 1.29  | 0.02  | 1.27  |
| 1611 | gang bei qu                            | No | 1.48  | 0.00  | 1.48  |
| 1612 | gang nan qu                            | No | 0.23  | 0.00  | 0.23  |
| 1613 | tan tang qu                            | No | 0.00  | 0.00  | 0.00  |
| 1614 | ping nan xian                          | No | 0.06  | 0.00  | 0.06  |
| 1615 | gui ping shi                           | No | 2.90  | 0.68  | 2.84  |
| 1616 | yu zhou qu                             | No | 1.23  | 0.86  | 0.37  |
| 1617 | rong xian                              | No | 2.76  | 1.12  | 1.71  |
| 1618 | lu chuan xian                          | No | 0.00  | 0.00  | 0.00  |
| 1619 | bo bai xian                            | No | 4.16  | 4.16  | 0.00  |
| 1620 | xing ye xian                           | No | 1.58  | 1.32  | 0.88  |
| 1621 | bei liu shi                            | No | 6.19  | 5.99  | 1.31  |
| 1622 | you jiang qu                           | No | 22.26 | 21.18 | 3.03  |
| 1623 | ping guo xian                          | No | 12.85 | 12.19 | 3.09  |
| 1624 | ba bu qu                               | No | 5.04  | 3.86  | 2.46  |
| 1625 | zhong shan xian                        | No | 0.05  | 0.05  | 0.00  |
| 1626 | jin cheng jiang qu                     | No | 4.80  | 0.00  | 4.80  |
| 1627 | nan dan xian                           | No | 0.57  | 0.38  | 0.19  |
| 1628 | tian e xian                            | No | 15.25 | 13.94 | 1.31  |
| 1629 | yi zhou shi                            | No | 0.18  | 0.00  | 0.18  |
| 1630 | xing bin qu                            | No | 0.48  | 0.25  | 0.22  |
| 1631 | xiang zhou xian                        | No | 0.83  | 0.16  | 0.67  |

|      |                               |    |        |       |        |
|------|-------------------------------|----|--------|-------|--------|
| 1632 | wu xuan xian                  | No | 2.03   | 0.00  | 2.03   |
| 1633 | he shan shi                   | No | 0.91   | 0.00  | 0.91   |
| 1634 | jiang zhou qu                 | No | 12.19  | 11.39 | 0.79   |
| 1635 | fu sui xian                   | No | 6.34   | 6.34  | 0.00   |
| 1636 | ping xiang shi                | No | 0.00   | 0.00  | 0.00   |
| 1637 | xiu ying qu                   | No | 30.84  | 17.10 | 23.04  |
| 1638 | long hua qu                   | No | 5.16   | 1.18  | 4.05   |
| 1639 | qiong shan qu                 | No | 1.05   | 0.00  | 1.05   |
| 1640 | mei lan qu                    | No | 5.07   | 3.99  | 1.07   |
| 1641 | san ya shi                    | No | 7.01   | 4.33  | 3.13   |
| 1642 | qiong hai shi                 | No | 3.78   | 3.29  | 0.48   |
| 1643 | dan zhou shi                  | No | 5.77   | 2.05  | 3.72   |
| 1644 | wen chang shi                 | No | 4.55   | 4.37  | 0.18   |
| 1645 | wan ning shi                  | No | 21.00  | 18.35 | 2.76   |
| 1646 | dong fang shi                 | No | 14.86  | 12.36 | 6.89   |
| 1647 | ding an xian                  | No | 2.80   | 0.00  | 2.80   |
| 1648 | tun chang xian                | No | 0.03   | 0.00  | 0.03   |
| 1649 | cheng mai xian                | No | 0.08   | 0.08  | 0.00   |
| 1650 | chang jiang li zu zi zhi xian | No | 29.21  | 15.29 | 14.09  |
| 1651 | le dong li zu zi zhi xian     | No | 16.07  | 9.48  | 6.79   |
| 1652 | ling shui li zu zi zhi xian   | No | 18.75  | 10.31 | 17.96  |
| 1653 | fu ling qu                    | No | 6.27   | 5.45  | 1.06   |
| 1654 | yu zhong qu                   | No | 0.00   | 0.00  | 0.00   |
| 1655 | da du kou qu                  | No | 7.33   | 0.02  | 7.31   |
| 1656 | jiang bei qu                  | No | 7.01   | 0.00  | 7.01   |
| 1657 | sha ping ba qu                | No | 7.92   | 3.47  | 4.46   |
| 1658 | jiu long po qu                | No | 8.38   | 2.15  | 6.23   |
| 1659 | nan an qu                     | No | 15.17  | 0.00  | 15.17  |
| 1660 | bei bei qu                    | No | 14.77  | 13.31 | 4.15   |
| 1661 | wan sheng qu                  | No | 25.03  | 16.23 | 20.67  |
| 1662 | shuang qiao qu                | No | 100.00 | 0.00  | 100.00 |
| 1663 | yu bei qu                     | No | 5.89   | 2.89  | 3.16   |
| 1664 | ba nan qu                     | No | 6.27   | 0.56  | 5.97   |
| 1665 | zhang shou qu                 | No | 0.23   | 0.13  | 0.10   |
| 1666 | jiang jin qu                  | No | 13.21  | 11.36 | 1.95   |
| 1667 | he chuan qu                   | No | 2.84   | 0.86  | 2.36   |
| 1668 | yong chuan qu                 | No | 7.94   | 0.59  | 7.35   |
| 1669 | nan chuan qu                  | No | 16.70  | 15.44 | 4.25   |
| 1670 | qi jiang xian                 | No | 15.56  | 12.71 | 5.09   |
| 1671 | tong nan xian                 | No | 1.20   | 0.00  | 1.20   |
| 1672 | tong liang xian               | No | 4.42   | 0.01  | 4.42   |
| 1673 | da zu xian                    | No | 2.63   | 0.70  | 2.63   |
| 1674 | rong chang xian               | No | 1.34   | 0.00  | 1.34   |
| 1675 | bi shan xian                  | No | 10.07  | 3.78  | 6.29   |
| 1676 | liang ping xian               | No | 1.97   | 0.02  | 1.95   |
| 1677 | dian jiang xian               | No | 4.25   | 3.04  | 1.22   |
| 1678 | zhong xian                    | No | 8.94   | 8.37  | 1.09   |
| 1679 | jin jiang qu                  | No | 0.00   | 0.00  | 0.00   |
| 1680 | qing yang qu                  | No | 0.00   | 0.00  | 0.00   |
| 1681 | jin niu qu                    | No | 0.00   | 0.00  | 0.00   |
| 1682 | wu hou qu                     | No | 0.00   | 0.00  | 0.00   |
| 1683 | cheng hua qu                  | No | 0.00   | 0.00  | 0.00   |
| 1684 | long quan yi qu               | No | 0.50   | 0.50  | 0.00   |
| 1685 | qing bai jiang qu             | No | 0.00   | 0.00  | 0.00   |
| 1686 | xin dou qu                    | No | 0.00   | 0.00  | 0.00   |
| 1687 | wen jiang qu                  | No | 0.00   | 0.00  | 0.00   |
| 1688 | jin tang xian                 | No | 0.00   | 0.00  | 0.00   |
| 1689 | shuang liu xian               | No | 0.00   | 0.00  | 0.00   |
| 1690 | pi xian                       | No | 0.00   | 0.00  | 0.00   |
| 1691 | da yi xian                    | No | 22.85  | 21.10 | 20.65  |
| 1692 | pu jiang xian                 | No | 0.86   | 0.86  | 0.00   |
| 1693 | xin jin xian                  | No | 1.88   | 0.00  | 1.88   |
| 1694 | dou jiang yan shi             | No | 27.50  | 25.10 | 24.73  |
| 1695 | peng zhou shi                 | No | 27.84  | 21.31 | 12.38  |
| 1696 | qiong lai shi                 | No | 1.09   | 0.00  | 1.09   |
| 1697 | chong zhou shi                | No | 12.00  | 9.68  | 2.43   |
| 1698 | zi liu jing qu                | No | 14.15  | 0.00  | 14.15  |
| 1699 | gong jing qu                  | No | 0.11   | 0.00  | 0.11   |
| 1700 | da an qu                      | No | 2.17   | 0.00  | 2.17   |
| 1701 | yan tan qu                    | No | 0.00   | 0.00  | 0.00   |
| 1702 | rong xian                     | No | 0.18   | 0.07  | 0.11   |
| 1703 | fu shun xian                  | No | 0.01   | 0.00  | 0.01   |
| 1704 | dong qu                       | No | 0.00   | 0.00  | 0.00   |
| 1705 | xi qu                         | No | 9.51   | 9.51  | 0.00   |
| 1706 | ren he qu                     | No | 1.16   | 0.31  | 0.85   |
| 1707 | mi yi xian                    | No | 17.73  | 11.57 | 12.75  |
| 1708 | yan bian xian                 | No | 29.73  | 22.23 | 11.57  |
| 1709 | jiang yang qu                 | No | 5.52   | 5.38  | 0.15   |
| 1710 | na xi qu                      | No | 2.99   | 2.50  | 0.49   |
| 1711 | long ma tan qu                | No | 2.94   | 2.94  | 0.00   |
| 1712 | lu xian                       | No | 0.47   | 0.36  | 0.11   |
| 1713 | he jiang xian                 | No | 26.71  | 26.15 | 4.43   |
| 1714 | jing yang qu                  | No | 2.68   | 0.00  | 2.68   |
| 1715 | zhong jiang xian              | No | 0.18   | 0.18  | 0.00   |
| 1716 | luo jiang xian                | No | 0.00   | 0.00  | 0.00   |
| 1717 | guang han shi                 | No | 1.15   | 1.15  | 0.00   |
| 1718 | shi fang shi                  | No | 31.65  | 27.68 | 8.98   |
| 1719 | mian zhu shi                  | No | 31.05  | 28.02 | 6.28   |
| 1720 | fu cheng qu                   | No | 1.62   | 0.00  | 1.62   |
| 1721 | you xian qu                   | No | 11.42  | 10.92 | 0.51   |
| 1722 | san tai xian                  | No | 23.97  | 23.96 | 0.01   |
| 1723 | yan ting xian                 | No | 2.34   | 1.84  | 0.50   |
| 1724 | an xian                       | No | 17.26  | 9.93  | 10.18  |
| 1725 | zi tong xian                  | No | 5.54   | 5.16  | 1.39   |
| 1726 | jiang you shi                 | No | 11.37  | 9.90  | 3.09   |
| 1727 | li zhou qu                    | No | 2.01   | 0.17  | 1.83   |
| 1728 | chuan shan qu                 | No | 0.99   | 0.00  | 0.99   |
| 1729 | an ju qu                      | No | 0.00   | 0.00  | 0.00   |
| 1730 | peng xi xian                  | No | 0.00   | 0.00  | 0.00   |
| 1731 | she hong xian                 | No | 3.42   | 2.66  | 1.05   |
| 1732 | da ying xian                  | No | 0.35   | 0.00  | 0.35   |
| 1733 | shi zhong qu                  | No | 7.32   | 2.05  | 5.45   |
| 1734 | dong xing qu                  | No | 0.44   | 0.05  | 0.38   |
| 1735 | wei yuan xian                 | No | 0.23   | 0.00  | 0.23   |
| 1736 | zi zhong xian                 | No | 1.37   | 0.02  | 1.36   |
| 1737 | long chang xian               | No | 3.97   | 0.00  | 3.97   |
| 1738 | shi zhong qu                  | No | 3.33   | 0.93  | 2.48   |
| 1739 | sha wan qu                    | No | 7.08   | 0.00  | 7.08   |
| 1740 | wu tong qiao qu               | No | 0.00   | 0.00  | 0.00   |



|      |                                   |    |       |       |       |
|------|-----------------------------------|----|-------|-------|-------|
| 1741 | jìn kǒu hé qū                     | No | 30.12 | 17.79 | 12.55 |
| 1742 | jiàn wēi xiān                     | No | 0.32  | 0.00  | 0.32  |
| 1743 | jīng yān xiān                     | No | 0.00  | 0.00  | 0.00  |
| 1744 | jiā jiāng xiān                    | No | 0.05  | 0.00  | 0.05  |
| 1745 | e biān yì zǔ zì zhī xiān          | No | 19.36 | 12.60 | 11.54 |
| 1746 | e měi shān shì                    | No | 0.38  | 0.00  | 0.38  |
| 1747 | shùn qīng qū                      | No | 0.39  | 0.01  | 0.38  |
| 1748 | gāo píng qū                       | No | 6.71  | 0.00  | 6.71  |
| 1749 | yīng shān xiān                    | No | 4.08  | 0.00  | 4.08  |
| 1750 | pēng ān xiān                      | No | 4.62  | 0.00  | 4.62  |
| 1751 | xī chōng xiān                     | No | 0.38  | 0.01  | 0.38  |
| 1752 | dōng pō qū                        | No | 0.25  | 0.00  | 0.25  |
| 1753 | rén shǒu xiān                     | No | 1.28  | 0.00  | 1.28  |
| 1754 | pēng shān xiān                    | No | 0.00  | 0.00  | 0.00  |
| 1755 | hōng yā xiān                      | No | 32.45 | 19.49 | 32.28 |
| 1756 | dān lēng xiān                     | No | 0.59  | 0.00  | 0.59  |
| 1757 | qīng shēn xiān                    | No | 0.00  | 0.00  | 0.00  |
| 1758 | cù píng qū                        | No | 2.57  | 2.47  | 0.10  |
| 1759 | yì bīn xiān                       | No | 1.36  | 1.21  | 0.15  |
| 1760 | nān xī xiān                       | No | 4.18  | 3.18  | 1.00  |
| 1761 | jiāng ān xiān                     | No | 17.96 | 2.65  | 15.31 |
| 1762 | zhāng níng xiān                   | No | 28.35 | 28.19 | 0.17  |
| 1763 | gāo xiān                          | No | 0.30  | 0.00  | 0.30  |
| 1764 | gōng xiān                         | No | 0.18  | 0.12  | 0.06  |
| 1765 | jūn lǐ lián xiān                  | No | 5.40  | 5.40  | 0.00  |
| 1766 | xíng wén xiān                     | No | 9.60  | 0.20  | 9.44  |
| 1767 | yue chí xiān                      | No | 0.81  | 0.00  | 0.81  |
| 1768 | wú shēng xiān                     | No | 0.00  | 0.00  | 0.00  |
| 1769 | lín shuǐ xiān                     | No | 0.89  | 0.12  | 0.77  |
| 1770 | huà yǐng shì                      | No | 21.24 | 0.18  | 21.24 |
| 1771 | tóng chuān qū                     | No | 2.83  | 0.00  | 2.83  |
| 1772 | dà xiān                           | No | 1.51  | 0.00  | 1.51  |
| 1773 | kāi jiāng xiān                    | No | 0.05  | 0.00  | 0.05  |
| 1774 | dà zhū xiān                       | No | 0.98  | 0.00  | 0.98  |
| 1775 | qū xiān                           | No | 2.33  | 0.00  | 2.33  |
| 1776 | yú chéng qū                       | No | 4.16  | 2.70  | 1.92  |
| 1777 | míng shān xiān                    | No | 0.13  | 0.00  | 0.13  |
| 1778 | yǐng jǐng xiān                    | No | 19.72 | 16.53 | 4.95  |
| 1779 | hàn yuán xiān                     | No | 2.99  | 0.19  | 2.91  |
| 1780 | shì miàn xiān                     | No | 31.54 | 31.52 | 0.09  |
| 1781 | tiān quán xiān                    | No | 34.59 | 11.47 | 23.61 |
| 1782 | lù shān xiān                      | No | 18.92 | 5.79  | 18.76 |
| 1783 | bào xíng xiān                     | No | 33.55 | 12.71 | 20.90 |
| 1784 | yān jiāng qū                      | No | 0.00  | 0.00  | 0.00  |
| 1785 | ān yuè xiān                       | No | 2.00  | 1.91  | 0.09  |
| 1786 | lè zhī xiān                       | No | 0.00  | 0.00  | 0.00  |
| 1787 | jiàn yáng shì                     | No | 0.13  | 0.13  | 0.00  |
| 1788 | xī chāng shì                      | No | 2.47  | 0.00  | 2.47  |
| 1789 | dé chāng xiān                     | No | 8.07  | 6.45  | 1.65  |
| 1790 | huì lì xiān                       | No | 0.01  | 0.01  | 0.01  |
| 1791 | huì dōng xiān                     | No | 0.02  | 0.00  | 0.02  |
| 1792 | níng nán xiān                     | No | 0.04  | 0.04  | 0.00  |
| 1793 | miàn níng xiān                    | No | 6.44  | 5.38  | 1.06  |
| 1794 | nān míng qū                       | No | 12.57 | 0.00  | 12.57 |
| 1795 | yún yān qū                        | No | 8.73  | 0.00  | 8.73  |
| 1796 | huà xī qū                         | No | 11.01 | 0.17  | 10.85 |
| 1797 | wú dāng qū                        | No | 9.77  | 0.00  | 9.77  |
| 1798 | bái yún qū                        | No | 30.64 | 0.00  | 30.64 |
| 1799 | xiǎo hé qū                        | No | 12.08 | 0.00  | 12.08 |
| 1800 | kāi yáng xiān                     | No | 1.84  | 0.01  | 1.84  |
| 1801 | xī fēng xiān                      | No | 3.50  | 0.00  | 3.50  |
| 1802 | xiū wén xiān                      | No | 1.86  | 0.00  | 1.86  |
| 1803 | qīng zhēn shì                     | No | 5.15  | 0.00  | 5.15  |
| 1804 | zhōng shān qū                     | No | 2.57  | 0.00  | 2.57  |
| 1805 | hōng huà gāng qū                  | No | 6.29  | 0.84  | 6.29  |
| 1806 | huì chuān qū                      | No | 3.05  | 0.48  | 2.73  |
| 1807 | zūn yì xiān                       | No | 3.32  | 2.38  | 0.94  |
| 1808 | suí yáng xiān                     | No | 23.12 | 19.91 | 5.48  |
| 1809 | yú qīng xiān                      | No | 3.46  | 0.06  | 3.41  |
| 1810 | rén huái shì                      | No | 1.02  | 0.45  | 0.56  |
| 1811 | xíng yì shì                       | No | 10.49 | 1.88  | 8.94  |
| 1812 | bì jiē shì                        | No | 2.70  | 1.28  | 1.65  |
| 1813 | jìn shā xiān                      | No | 6.39  | 2.61  | 4.05  |
| 1814 | kāi lì shì                        | No | 0.49  | 0.00  | 0.49  |
| 1815 | dōu yún shì                       | No | 4.87  | 3.37  | 1.67  |
| 1816 | fú quán shì                       | No | 3.83  | 0.01  | 3.82  |
| 1817 | wú huà qū                         | No | 1.04  | 0.00  | 1.04  |
| 1818 | pān lóng qū                       | No | 4.19  | 0.00  | 4.19  |
| 1819 | guān dù qū                        | No | 0.23  | 0.23  | 0.00  |
| 1820 | xī shān qū                        | No | 1.47  | 0.00  | 1.47  |
| 1821 | chéng gōng xiān                   | No | 1.16  | 0.13  | 1.03  |
| 1822 | jìn níng xiān                     | No | 0.96  | 0.13  | 0.83  |
| 1823 | fú mǐn xiān                       | No | 0.00  | 0.00  | 0.00  |
| 1824 | yì liáng xiān                     | No | 4.75  | 2.17  | 2.87  |
| 1825 | shì lín yì zǔ zì zhī xiān         | No | 23.02 | 0.00  | 23.02 |
| 1826 | sōng míng xiān                    | No | 0.00  | 0.00  | 0.00  |
| 1827 | ān níng shì                       | No | 0.00  | 0.00  | 0.00  |
| 1828 | qí lín qū                         | No | 4.47  | 4.28  | 0.19  |
| 1829 | mǎ lóng xiān                      | No | 1.94  | 1.91  | 0.02  |
| 1830 | lù liáng xiān                     | No | 2.96  | 2.71  | 1.29  |
| 1831 | zhān yì xiān                      | No | 23.35 | 22.68 | 1.81  |
| 1832 | hōng tā qū                        | No | 5.77  | 5.77  | 0.00  |
| 1833 | jiāng chuān xiān                  | No | 22.14 | 8.31  | 13.84 |
| 1834 | chéng jiāng xiān                  | No | 23.35 | 5.42  | 20.28 |
| 1835 | tóng hǎi xiān                     | No | 17.55 | 12.47 | 5.08  |
| 1836 | huà níng xiān                     | No | 6.85  | 4.89  | 2.41  |
| 1837 | yì mén xiān                       | No | 6.46  | 5.89  | 0.65  |
| 1838 | e shān yì zǔ zì zhī xiān          | No | 6.53  | 6.53  | 0.00  |
| 1839 | xín píng yì zǔ dài zǔ zì zhī xiān | No | 12.04 | 7.73  | 5.68  |
| 1840 | yuán jiāng                        | No | 8.11  | 8.11  | 0.00  |
| 1841 | tēng chōng xiān                   | No | 11.99 | 7.89  | 4.64  |
| 1842 | shuǐ fú xiān                      | No | 7.28  | 5.71  | 6.98  |
| 1843 | gū chéng qū                       | No | 0.25  | 0.25  | 0.00  |
| 1844 | huà píng xiān                     | No | 0.00  | 0.00  | 0.00  |
| 1845 | sì mǎo qū                         | No | 7.02  | 5.00  | 2.02  |
| 1846 | jiāng chéng qū                    | No | 18.73 | 16.72 | 2.65  |
| 1847 | chū xiōng shì                     | No | 4.98  | 4.98  | 0.40  |
| 1848 | yuán móu xiān                     | No | 0.99  | 0.99  | 0.00  |
| 1849 | lù fēng xiān                      | No | 4.05  | 1.77  | 3.14  |

|      |                                               |    |        |        |        |
|------|-----------------------------------------------|----|--------|--------|--------|
| 1850 | ge jiu shi                                    | No | 0.96   | 0.86   | 0.11   |
| 1851 | kai yuan shi                                  | No | 0.13   | 0.13   | 0.00   |
| 1852 | meng zi shi                                   | No | 0.91   | 0.31   | 0.60   |
| 1853 | jian shui xian                                | No | 1.83   | 0.42   | 1.41   |
| 1854 | mi le xian                                    | No | 1.72   | 0.00   | 1.72   |
| 1855 | he kou yao zu zi zhi xian                     | No | 22.29  | 21.59  | 0.88   |
| 1856 | jing hong shi                                 | No | 23.91  | 23.69  | 0.46   |
| 1857 | da li shi                                     | No | 35.76  | 35.00  | 20.94  |
| 1858 | rui li shi                                    | No | 12.55  | 12.33  | 0.22   |
| 1859 | xin cheng qu                                  | No | 100.00 | 100.00 | 100.00 |
| 1860 | bei lin qu                                    | No | 0.00   | 0.00   | 0.00   |
| 1861 | lian hu qu                                    | No | 0.00   | 0.00   | 0.00   |
| 1862 | ba qiao qu                                    | No | 8.35   | 2.39   | 6.04   |
| 1863 | wei yang qu                                   | No | 4.34   | 3.08   | 1.69   |
| 1864 | yan ta qu                                     | No | 7.02   | 0.00   | 7.02   |
| 1865 | yan liang qu                                  | No | 0.51   | 0.00   | 0.51   |
| 1866 | lin tong qu                                   | No | 2.31   | 0.00   | 2.31   |
| 1867 | zhang an qu                                   | No | 20.25  | 4.06   | 17.06  |
| 1868 | lan tian xian                                 | No | 3.26   | 0.00   | 3.26   |
| 1869 | hu xian                                       | No | 8.44   | 0.00   | 8.44   |
| 1870 | gao ling xian                                 | No | 5.08   | 5.07   | 0.01   |
| 1871 | wang yi qu                                    | No | 0.00   | 0.00   | 0.00   |
| 1872 | wei bin qu                                    | No | 22.42  | 15.74  | 11.37  |
| 1873 | jin tai qu                                    | No | 0.15   | 0.00   | 0.15   |
| 1874 | chen cang qu                                  | No | 5.69   | 0.16   | 5.54   |
| 1875 | feng xiang xian                               | No | 2.50   | 0.92   | 1.59   |
| 1876 | qi shan xian                                  | No | 7.15   | 0.04   | 7.12   |
| 1877 | mei xian                                      | No | 16.08  | 5.57   | 10.51  |
| 1878 | feng xian                                     | No | 12.89  | 6.75   | 7.18   |
| 1879 | qin dou qu                                    | No | 0.00   | 0.00   | 0.00   |
| 1880 | yang ling qu                                  | No | 0.00   | 0.00   | 0.00   |
| 1881 | wei cheng qu                                  | No | 0.00   | 0.00   | 0.00   |
| 1882 | san yuan xian                                 | No | 3.32   | 0.00   | 3.32   |
| 1883 | jing yang xian                                | No | 1.21   | 0.00   | 1.21   |
| 1884 | qian xian                                     | No | 0.45   | 0.00   | 0.45   |
| 1885 | li quan xian                                  | No | 0.82   | 0.00   | 0.82   |
| 1886 | bin xian                                      | No | 0.04   | 0.04   | 0.00   |
| 1887 | wu gong xian                                  | No | 0.00   | 0.00   | 0.00   |
| 1888 | xing ping shi                                 | No | 0.05   | 0.05   | 0.00   |
| 1889 | lin wei qu                                    | No | 1.59   | 0.00   | 1.59   |
| 1890 | hua xian                                      | No | 19.11  | 7.61   | 13.13  |
| 1891 | tong guan xian                                | No | 2.23   | 0.58   | 1.69   |
| 1892 | da li xian                                    | No | 13.41  | 12.65  | 0.95   |
| 1893 | han cheng shi                                 | No | 31.18  | 29.10  | 2.08   |
| 1894 | hua yin shi                                   | No | 19.58  | 0.00   | 19.58  |
| 1895 | bao ta qu                                     | No | 2.88   | 0.00   | 2.88   |
| 1896 | zi zhang xian                                 | No | 0.00   | 0.00   | 0.00   |
| 1897 | an sai xian                                   | No | 0.00   | 0.00   | 0.00   |
| 1898 | zhi dan xian                                  | No | 0.07   | 0.07   | 0.00   |
| 1899 | wu qi xian                                    | No | 2.61   | 0.00   | 2.61   |
| 1900 | gan quan xian                                 | No | 9.62   | 8.80   | 1.06   |
| 1901 | fu xian                                       | No | 17.25  | 14.09  | 4.88   |
| 1902 | luo chuan xian                                | No | 0.45   | 0.00   | 0.45   |
| 1903 | huang long xian                               | No | 38.73  | 35.16  | 3.68   |
| 1904 | huang ling xian                               | No | 13.06  | 11.13  | 1.93   |
| 1905 | han tai qu                                    | No | 17.63  | 2.86   | 14.77  |
| 1906 | yu yang qu                                    | No | 2.37   | 2.02   | 0.35   |
| 1907 | shen mu xian                                  | No | 3.14   | 2.98   | 0.16   |
| 1908 | fu gu xian                                    | No | 1.77   | 1.77   | 0.00   |
| 1909 | jing bian xian                                | No | 0.00   | 0.00   | 0.00   |
| 1910 | cheng guan qu                                 | No | 10.27  | 6.90   | 3.37   |
| 1911 | qi li he qu                                   | No | 16.40  | 0.80   | 16.40  |
| 1912 | xi gu qu                                      | No | 2.27   | 0.07   | 2.20   |
| 1913 | an ning qu                                    | No | 4.15   | 0.00   | 4.15   |
| 1914 | hong gu qu                                    | No | 0.00   | 0.00   | 0.00   |
| 1915 | jia yu guan shi                               | No | 18.09  | 8.65   | 15.91  |
| 1916 | jin chuan qu                                  | No | 0.35   | 0.00   | 0.35   |
| 1917 | yong chang xian                               | No | 15.11  | 13.64  | 2.04   |
| 1918 | bai yin qu                                    | No | 0.00   | 0.00   | 0.00   |
| 1919 | ping chuan qu                                 | No | 1.94   | 1.94   | 0.00   |
| 1920 | qin zhou qu                                   | No | 4.20   | 1.26   | 3.04   |
| 1921 | liang zhou qu                                 | No | 5.03   | 4.33   | 0.69   |
| 1922 | min qin xian                                  | No | 25.14  | 24.63  | 0.54   |
| 1923 | gan zhou qu                                   | No | 7.37   | 4.29   | 3.30   |
| 1924 | su nan yu gu zu zi zhi xian                   | No | 60.95  | 59.24  | 2.84   |
| 1925 | min le xian                                   | No | 20.96  | 20.93  | 1.23   |
| 1926 | lin ze xian                                   | No | 2.34   | 1.96   | 0.39   |
| 1927 | gao tai xian                                  | No | 7.39   | 6.87   | 0.52   |
| 1928 | shan dan xian                                 | No | 15.40  | 15.28  | 9.31   |
| 1929 | chong xin xian                                | No | 12.70  | 0.00   | 12.70  |
| 1930 | hua ting xian                                 | No | 8.05   | 0.05   | 8.00   |
| 1931 | su zhou qu                                    | No | 1.78   | 1.61   | 0.17   |
| 1932 | jin ta xian                                   | No | 16.92  | 15.74  | 1.49   |
| 1933 | gua zhou xian                                 | No | 35.12  | 35.12  | 0.00   |
| 1934 | su bei meng gu zu zi zhi xian                 | No | 34.41  | 32.99  | 4.09   |
| 1935 | a ke sai ha sa ke zu zi zhi xian              | No | 14.85  | 14.45  | 0.39   |
| 1936 | yu men shi                                    | No | 17.58  | 15.51  | 2.07   |
| 1937 | dun huang shi                                 | No | 29.05  | 28.57  | 2.10   |
| 1938 | xi feng qu                                    | No | 0.05   | 0.00   | 0.05   |
| 1939 | dong xiang xian                               | No | 0.49   | 0.14   | 0.38   |
| 1940 | cheng dong qu                                 | No | 1.27   | 0.00   | 1.27   |
| 1941 | cheng zhong qu                                | No | 20.50  | 0.00   | 20.50  |
| 1942 | cheng xi qu                                   | No | 3.33   | 0.00   | 3.33   |
| 1943 | cheng bei qu                                  | No | 1.96   | 0.00   | 1.96   |
| 1944 | hai xi meng gu zu cang zu zi zhi zhou zhi xia | No | 8.12   | 8.12   | 0.00   |
| 1945 | xing qing qu                                  | No | 8.13   | 0.00   | 8.13   |
| 1946 | xi xia qu                                     | No | 33.16  | 33.13  | 1.40   |
| 1947 | jin feng qu                                   | No | 9.89   | 0.00   | 9.89   |
| 1948 | yong ning xian                                | No | 7.43   | 6.81   | 0.63   |
| 1949 | he lan xian                                   | No | 25.76  | 24.01  | 7.20   |
| 1950 | ling wu shi                                   | No | 20.90  | 20.68  | 1.31   |
| 1951 | da wu kou qu                                  | No | 63.07  | 57.30  | 13.40  |
| 1952 | hui nong qu                                   | No | 35.27  | 32.71  | 2.57   |
| 1953 | ping luo xian                                 | No | 19.58  | 16.60  | 2.99   |
| 1954 | li tong qu                                    | No | 2.49   | 0.00   | 2.49   |
| 1955 | qing tong xia shi                             | No | 8.55   | 8.41   | 2.48   |
| 1956 | sha po tou qu                                 | No | 4.37   | 3.05   | 2.41   |
| 1957 | zhong ning xian                               | No | 1.97   | 1.40   | 0.57   |
| 1958 | tian shan qu                                  | No | 0.73   | 0.00   | 0.73   |

|      |                                         |     |       |       |       |
|------|-----------------------------------------|-----|-------|-------|-------|
| 1959 | sha yi ba ke qu                         | No  | 0.02  | 0.00  | 0.02  |
| 1960 | xin shi qu                              | No  | 0.00  | 0.00  | 0.00  |
| 1961 | shui mo gou qu                          | No  | 21.57 | 0.00  | 21.57 |
| 1962 | tou tun he qu                           | No  | 6.71  | 0.00  | 6.71  |
| 1963 | da ban cheng qu                         | No  | 2.53  | 0.15  | 2.53  |
| 1964 | mi dong qu                              | No  | 5.46  | 0.82  | 5.38  |
| 1965 | wu lu mu qi xian                        | No  | 20.29 | 0.02  | 20.27 |
| 1966 | du shan zi qu                           | No  | 1.73  | 1.21  | 0.52  |
| 1967 | ke la ma yi qu                          | No  | 6.38  | 0.03  | 6.35  |
| 1968 | bai jian tan qu                         | No  | 0.00  | 0.00  | 0.00  |
| 1969 | wu er he qu                             | No  | 0.00  | 0.00  | 0.00  |
| 1970 | tu lu fan shi                           | No  | 5.64  | 1.76  | 3.88  |
| 1971 | shan shan xian                          | No  | 6.97  | 6.93  | 0.03  |
| 1972 | tuo ke xun xian                         | No  | 0.24  | 0.22  | 0.02  |
| 1973 | ha mi shi                               | No  | 22.91 | 22.34 | 0.57  |
| 1974 | yi wu xian                              | No  | 1.38  | 0.00  | 1.38  |
| 1975 | chang ji shi                            | No  | 4.44  | 0.01  | 4.43  |
| 1976 | fu kang shi                             | No  | 17.29 | 12.02 | 9.38  |
| 1977 | hu tu bi xian                           | No  | 3.93  | 0.00  | 3.93  |
| 1978 | ma na si xian                           | No  | 5.04  | 0.62  | 4.42  |
| 1979 | qi tai xian                             | No  | 14.29 | 6.06  | 9.26  |
| 1980 | ji mu sa er xian                        | No  | 20.23 | 7.52  | 12.71 |
| 1981 | mu lei ha sa ke zi zhi xian             | No  | 1.07  | 0.00  | 1.07  |
| 1982 | bo le shi                               | No  | 25.03 | 4.28  | 20.75 |
| 1983 | jing he xian                            | No  | 32.37 | 29.54 | 3.12  |
| 1984 | wen quan xian                           | No  | 2.72  | 0.12  | 2.60  |
| 1985 | ku er le shi                            | No  | 2.50  | 2.49  | 0.25  |
| 1986 | lun tai xian                            | No  | 2.44  | 2.30  | 0.14  |
| 1987 | wei li xian                             | No  | 7.42  | 7.04  | 0.38  |
| 1988 | ruo qiang xian                          | No  | 41.46 | 41.46 | 0.01  |
| 1989 | qie mo xian                             | No  | 23.24 | 23.16 | 0.08  |
| 1990 | yan qi hui zu zi zhi xian               | No  | 3.82  | 0.64  | 3.82  |
| 1991 | he jing xian                            | No  | 5.26  | 3.95  | 1.31  |
| 1992 | he shuo xian                            | No  | 0.84  | 0.00  | 0.84  |
| 1993 | bo hu xian                              | No  | 45.57 | 9.75  | 44.96 |
| 1994 | a ke su shi                             | No  | 0.08  | 0.00  | 0.08  |
| 1995 | wen xiu xian                            | No  | 29.43 | 28.35 | 1.20  |
| 1996 | ku che xian                             | No  | 2.66  | 0.00  | 2.66  |
| 1997 | sha ya xian                             | No  | 8.97  | 8.02  | 0.95  |
| 1998 | xin he xian                             | No  | 0.00  | 0.00  | 0.00  |
| 1999 | bai cheng xian                          | No  | 0.02  | 0.00  | 0.01  |
| 2000 | a wa ti xian                            | No  | 14.59 | 14.50 | 0.10  |
| 2001 | yi ning shi                             | No  | 2.06  | 0.34  | 1.72  |
| 2002 | kui tun shi                             | No  | 0.89  | 0.89  | 0.00  |
| 2003 | yi ning xian                            | No  | 5.53  | 2.08  | 3.56  |
| 2004 | huo cheng xian                          | No  | 12.15 | 9.39  | 3.07  |
| 2005 | gong liu xian                           | No  | 21.64 | 8.08  | 13.56 |
| 2006 | xin yuan xian                           | No  | 16.13 | 8.84  | 7.29  |
| 2007 | zhao su xian                            | No  | 10.09 | 0.73  | 9.36  |
| 2008 | te ke si xian                           | No  | 5.22  | 0.00  | 5.22  |
| 2009 | ta cheng shi                            | No  | 0.63  | 0.00  | 0.63  |
| 2010 | wu su shi                               | No  | 9.82  | 3.81  | 6.14  |
| 2011 | e min xian                              | No  | 0.27  | 0.00  | 0.27  |
| 2012 | sha wan xian                            | No  | 5.29  | 1.63  | 3.66  |
| 2013 | yu min xian                             | No  | 19.98 | 16.21 | 7.92  |
| 2014 | he bu ke sai er meng gu zi zhi xian     | No  | 1.95  | 0.00  | 1.95  |
| 2015 | a le tai shi                            | No  | 14.41 | 3.07  | 11.34 |
| 2016 | bu er jin xian                          | No  | 24.03 | 16.50 | 11.60 |
| 2017 | fu yun xian                             | No  | 48.64 | 45.16 | 4.11  |
| 2018 | fu hai xian                             | No  | 14.13 | 8.39  | 6.00  |
| 2019 | ha ba he xian                           | No  | 30.20 | 18.10 | 14.32 |
| 2020 | shi he zi shi                           | No  | 6.24  | 5.47  | 0.96  |
| 2021 | a la er shi                             | No  | 0.81  | 0.01  | 0.80  |
| 2022 | tu mu shu ke shi                        | No  | 13.46 | 9.88  | 3.65  |
| 2023 | wu jia qu shi                           | No  | 2.49  | 2.49  | 0.00  |
| 2024 | shuang hu xian                          | Yes | 85.00 | 85.00 | 0.00  |
| 2025 | hang tang xian                          | Yes | 2.03  | 0.00  | 2.03  |
| 2026 | ling shou xian                          | Yes | 11.80 | 11.37 | 9.18  |
| 2027 | zan huang xian                          | Yes | 27.43 | 24.98 | 7.89  |
| 2028 | ping shan xian                          | Yes | 12.03 | 8.02  | 9.94  |
| 2029 | qing long man zu zi zhi xian            | Yes | 6.43  | 3.73  | 4.79  |
| 2030 | da ming xian                            | Yes | 0.00  | 0.00  | 0.00  |
| 2031 | wei xian                                | Yes | 0.00  | 0.00  | 0.00  |
| 2032 | lin cheng xian                          | Yes | 11.41 | 7.06  | 10.09 |
| 2033 | ju lu xian                              | Yes | 0.00  | 0.00  | 0.00  |
| 2034 | xin he xian                             | Yes | 0.00  | 0.00  | 0.00  |
| 2035 | guang zong xian                         | Yes | 0.00  | 0.00  | 0.00  |
| 2036 | ping xiang xian                         | Yes | 0.00  | 0.00  | 0.00  |
| 2037 | wei xian                                | Yes | 0.00  | 0.00  | 0.00  |
| 2038 | lai shui xian                           | Yes | 31.39 | 14.94 | 19.97 |
| 2039 | fu ping xian                            | Yes | 14.99 | 14.63 | 5.03  |
| 2040 | tang xian                               | Yes | 1.39  | 0.92  | 1.39  |
| 2041 | lai yuan xian                           | Yes | 6.97  | 3.92  | 3.07  |
| 2042 | wang dou xian                           | Yes | 0.00  | 0.00  | 0.00  |
| 2043 | yi xian                                 | Yes | 13.95 | 13.48 | 3.34  |
| 2044 | qu yang xian                            | Yes | 0.03  | 0.00  | 0.03  |
| 2045 | shun ping xian                          | Yes | 0.00  | 0.00  | 0.00  |
| 2046 | xuan hua qu                             | Yes | 2.70  | 0.11  | 2.59  |
| 2047 | zhang bei xian                          | Yes | 5.36  | 0.00  | 5.36  |
| 2048 | kang bao xian                           | Yes | 0.11  | 0.00  | 0.11  |
| 2049 | gu yuan xian                            | Yes | 6.15  | 0.00  | 6.15  |
| 2050 | shang yi xian                           | Yes | 3.24  | 0.00  | 3.24  |
| 2051 | wei xian                                | Yes | 7.91  | 4.01  | 7.87  |
| 2052 | yang yuan xian                          | Yes | 1.46  | 0.50  | 0.96  |
| 2053 | huai an xian                            | Yes | 3.77  | 0.00  | 3.77  |
| 2054 | wan quan xian                           | Yes | 0.51  | 0.00  | 0.51  |
| 2055 | chi cheng xian                          | Yes | 6.08  | 2.64  | 5.82  |
| 2056 | chong li xian                           | Yes | 1.82  | 0.00  | 1.82  |
| 2057 | cheng de xian                           | Yes | 4.37  | 2.69  | 1.75  |
| 2058 | ping quan xian                          | Yes | 14.32 | 13.61 | 4.67  |
| 2059 | luan ping xian                          | Yes | 6.84  | 5.55  | 2.98  |
| 2060 | long hua xian                           | Yes | 8.93  | 7.29  | 1.65  |
| 2061 | feng ning man zu zi zhi xian            | Yes | 4.95  | 3.10  | 2.08  |
| 2062 | wei chang man zu meng gu zu zi zhi xian | Yes | 21.34 | 11.84 | 11.91 |
| 2063 | hai xing xian                           | Yes | 20.82 | 20.82 | 1.08  |
| 2064 | yan shan xian                           | Yes | 0.00  | 0.00  | 0.00  |
| 2065 | nan pi xian                             | Yes | 0.00  | 0.00  | 0.00  |
| 2066 | wu yi xian                              | Yes | 0.00  | 0.00  | 0.00  |
| 2067 | wu qiang xian                           | Yes | 0.00  | 0.00  | 0.00  |

|      |                                   |     |       |       |       |
|------|-----------------------------------|-----|-------|-------|-------|
| 2068 | rao yang xian                     | Yes | 0.00  | 0.00  | 0.00  |
| 2069 | fu cheng xian                     | Yes | 0.78  | 0.00  | 0.78  |
| 2070 | lou fan xian                      | Yes | 50.89 | 50.87 | 1.83  |
| 2071 | yang gao xian                     | Yes | 20.36 | 11.91 | 8.52  |
| 2072 | tian zhen xian                    | Yes | 9.87  | 0.00  | 9.87  |
| 2073 | guang ling xian                   | Yes | 17.18 | 10.16 | 7.03  |
| 2074 | ling qiu xian                     | Yes | 26.35 | 26.07 | 0.62  |
| 2075 | hun yuan xian                     | Yes | 18.23 | 6.85  | 15.69 |
| 2076 | da tong xian                      | Yes | 33.01 | 25.00 | 11.83 |
| 2077 | ping shun xian                    | Yes | 11.12 | 0.01  | 11.11 |
| 2078 | hu guan xian                      | Yes | 16.31 | 0.00  | 16.31 |
| 2079 | wu xiang xian                     | Yes | 0.15  | 0.12  | 0.08  |
| 2080 | you yu xian                       | Yes | 12.66 | 0.00  | 12.66 |
| 2081 | zuo quan xian                     | Yes | 28.50 | 17.29 | 12.35 |
| 2082 | he shun xian                      | Yes | 18.93 | 17.58 | 1.78  |
| 2083 | ping lu xian                      | Yes | 5.37  | 5.06  | 0.35  |
| 2084 | wu tai xian                       | Yes | 14.60 | 0.57  | 14.59 |
| 2085 | dai xian                          | Yes | 3.71  | 0.04  | 3.66  |
| 2086 | fan zhi xian                      | Yes | 12.25 | 10.41 | 3.44  |
| 2087 | ning wu xian                      | Yes | 30.41 | 10.36 | 30.30 |
| 2088 | jing le xian                      | Yes | 0.40  | 0.08  | 0.32  |
| 2089 | shen chi xian                     | Yes | 0.16  | 0.00  | 0.16  |
| 2090 | wu zhai xian                      | Yes | 1.23  | 1.18  | 1.23  |
| 2091 | ke lan xian                       | Yes | 1.48  | 0.26  | 1.32  |
| 2092 | he qu xian                        | Yes | 0.01  | 0.01  | 0.00  |
| 2093 | bao de xian                       | Yes | 19.81 | 18.43 | 1.37  |
| 2094 | pian guan xian                    | Yes | 0.36  | 0.00  | 0.36  |
| 2095 | ji xian                           | Yes | 17.52 | 14.93 | 2.74  |
| 2096 | da ning xian                      | Yes | 3.48  | 0.20  | 3.29  |
| 2097 | xi xian                           | Yes | 9.08  | 2.78  | 6.30  |
| 2098 | yong he xian                      | Yes | 8.81  | 0.11  | 8.70  |
| 2099 | fen xi xian                       | Yes | 1.88  | 0.00  | 1.88  |
| 2100 | xing xian                         | Yes | 13.36 | 13.27 | 0.31  |
| 2101 | lin xian                          | Yes | 2.41  | 0.07  | 2.39  |
| 2102 | shi lou xian                      | Yes | 9.46  | 9.43  | 0.02  |
| 2103 | lan xian                          | Yes | 1.54  | 0.19  | 1.36  |
| 2104 | fang shan xian                    | Yes | 14.91 | 2.16  | 14.81 |
| 2105 | zhong yang xian                   | Yes | 8.03  | 7.53  | 0.52  |
| 2106 | wu chuan xian                     | Yes | 15.11 | 14.97 | 0.80  |
| 2107 | a lu ke er qin qi                 | Yes | 19.90 | 19.90 | 0.26  |
| 2108 | ba lin zuo qi                     | Yes | 12.26 | 11.34 | 2.86  |
| 2109 | ba lin you qi                     | Yes | 12.81 | 12.38 | 0.44  |
| 2110 | lin xi xian                       | Yes | 6.70  | 6.70  | 6.70  |
| 2111 | weng niu te qi                    | Yes | 5.25  | 4.51  | 1.09  |
| 2112 | ka la qin qi                      | Yes | 9.79  | 2.21  | 9.15  |
| 2113 | ning cheng xian                   | Yes | 8.33  | 6.45  | 1.90  |
| 2114 | ao han qi                         | Yes | 12.13 | 12.10 | 0.23  |
| 2115 | ke er qin zuo yi zhong qi         | Yes | 11.10 | 11.10 | 0.03  |
| 2116 | ke er qin zuo yi hou qi           | Yes | 10.90 | 10.77 | 0.62  |
| 2117 | ku lun qi                         | Yes | 12.36 | 12.24 | 2.29  |
| 2118 | nai man qi                        | Yes | 8.95  | 8.49  | 0.85  |
| 2119 | mo li da wa da wo er zu zi zhi qi | Yes | 1.60  | 1.12  | 0.48  |
| 2120 | e lun chun zi zhi qi              | Yes | 19.68 | 17.36 | 2.52  |
| 2121 | zhuo zi xian                      | Yes | 19.29 | 18.92 | 0.46  |
| 2122 | hua de xian                       | Yes | 0.11  | 0.11  | 0.00  |
| 2123 | shang dou xian                    | Yes | 0.23  | 0.00  | 0.22  |
| 2124 | xing he xian                      | Yes | 6.57  | 6.15  | 0.79  |
| 2125 | cha ha er you yi qian qi          | Yes | 13.39 | 13.27 | 0.12  |
| 2126 | cha ha er you yi zhong qi         | Yes | 3.33  | 3.32  | 1.58  |
| 2127 | cha ha er you yi hou qi           | Yes | 2.38  | 0.76  | 1.70  |
| 2128 | si zi wang qi                     | Yes | 0.41  | 0.41  | 0.40  |
| 2129 | a er shan shi                     | Yes | 24.28 | 11.72 | 19.40 |
| 2130 | ke er qin you yi qian qi          | Yes | 4.49  | 3.47  | 1.03  |
| 2131 | ke er qin you yi zhong qi         | Yes | 19.62 | 19.62 | 0.00  |
| 2132 | zha lai te qi                     | Yes | 7.88  | 6.83  | 1.05  |
| 2133 | tu quan xian                      | Yes | 6.67  | 6.67  | 0.00  |
| 2134 | su ni te you qi                   | Yes | 0.98  | 0.98  | 0.00  |
| 2135 | tai pu si qi                      | Yes | 0.00  | 0.00  | 0.00  |
| 2136 | zheng xiang bai qi                | Yes | 0.31  | 0.00  | 0.31  |
| 2137 | jing yu xian                      | Yes | 61.48 | 14.24 | 53.29 |
| 2138 | zhen lai xian                     | Yes | 28.01 | 27.49 | 0.52  |
| 2139 | tong yu xian                      | Yes | 20.46 | 20.40 | 0.06  |
| 2140 | da an shi                         | Yes | 4.05  | 1.77  | 2.28  |
| 2141 | long jing shi                     | Yes | 24.19 | 24.16 | 0.04  |
| 2142 | he long shi                       | Yes | 12.16 | 4.48  | 7.68  |
| 2143 | wang qing xian                    | Yes | 12.66 | 9.14  | 3.52  |
| 2144 | an tu xian                        | Yes | 23.64 | 20.98 | 3.92  |
| 2145 | yan shou xian                     | Yes | 3.60  | 0.01  | 3.60  |
| 2146 | long jiang xian                   | Yes | 6.21  | 6.21  | 0.00  |
| 2147 | tai lai xian                      | Yes | 8.07  | 6.84  | 1.24  |
| 2148 | gan nan xian                      | Yes | 0.65  | 0.64  | 0.01  |
| 2149 | fu yu xian                        | Yes | 19.56 | 19.08 | 0.48  |
| 2150 | ke dong xian                      | Yes | 3.42  | 3.41  | 0.01  |
| 2151 | bai quan xian                     | Yes | 6.82  | 6.82  | 0.00  |
| 2152 | sui bin xian                      | Yes | 16.44 | 16.44 | 0.62  |
| 2153 | rao he xian                       | Yes | 92.28 | 91.91 | 3.20  |
| 2154 | lin dian xian                     | Yes | 24.34 | 24.34 | 0.00  |
| 2155 | hua nan xian                      | Yes | 16.90 | 15.39 | 4.58  |
| 2156 | hua chuan xian                    | Yes | 13.89 | 12.33 | 3.32  |
| 2157 | tang yuan xian                    | Yes | 11.27 | 10.21 | 3.13  |
| 2158 | fu yuan xian                      | Yes | 32.87 | 31.81 | 2.00  |
| 2159 | tong jiang shi                    | Yes | 24.76 | 22.49 | 2.77  |
| 2160 | wang kui xian                     | Yes | 5.06  | 5.05  | 0.01  |
| 2161 | lan xi xian                       | Yes | 10.09 | 8.52  | 3.78  |
| 2162 | qing gang xian                    | Yes | 3.92  | 2.83  | 1.09  |
| 2163 | ming shui xian                    | Yes | 13.34 | 13.34 | 0.00  |
| 2164 | hai lun shi                       | Yes | 6.47  | 5.89  | 0.59  |
| 2165 | qian shan xian                    | Yes | 10.43 | 0.88  | 9.56  |
| 2166 | tai hu xian                       | Yes | 14.17 | 1.58  | 12.60 |
| 2167 | xiu song xian                     | Yes | 29.22 | 28.45 | 0.82  |
| 2168 | wang jiang xian                   | Yes | 18.58 | 18.58 | 0.00  |
| 2169 | yue xi xian                       | Yes | 16.13 | 15.74 | 0.43  |
| 2170 | ying dong qu                      | Yes | 7.95  | 0.00  | 7.95  |
| 2171 | lin quan xian                     | Yes | 11.47 | 10.88 | 0.61  |
| 2172 | fu nan xian                       | Yes | 4.61  | 0.27  | 4.34  |
| 2173 | ying shang xian                   | Yes | 9.21  | 7.33  | 1.88  |
| 2174 | dang shan xian                    | Yes | 9.65  | 9.20  | 1.22  |
| 2175 | xiao xian                         | Yes | 3.55  | 2.97  | 1.56  |
| 2176 | ling bi xian                      | Yes | 0.20  | 0.00  | 0.20  |

|      |                                  |     |       |       |       |
|------|----------------------------------|-----|-------|-------|-------|
| 2177 | si xian                          | Yes | 1.81  | 1.31  | 0.50  |
| 2178 | yu an qu                         | Yes | 2.17  | 0.00  | 2.17  |
| 2179 | shou xian                        | Yes | 1.14  | 0.00  | 1.14  |
| 2180 | huo qiu xian                     | Yes | 3.85  | 3.75  | 0.11  |
| 2181 | shu cheng xian                   | Yes | 4.88  | 0.90  | 4.87  |
| 2182 | jin zhai xian                    | Yes | 10.63 | 10.25 | 3.55  |
| 2183 | li xin xian                      | Yes | 0.99  | 0.00  | 0.99  |
| 2184 | shi tai xian                     | Yes | 5.98  | 2.63  | 3.40  |
| 2185 | lian hua xian                    | Yes | 6.82  | 4.54  | 2.28  |
| 2186 | xiu shui xian                    | Yes | 8.37  | 7.45  | 0.91  |
| 2187 | gan xian                         | Yes | 7.28  | 0.63  | 7.28  |
| 2188 | shang you xian                   | Yes | 21.60 | 7.94  | 21.60 |
| 2189 | an yuan xian                     | Yes | 9.05  | 6.33  | 2.73  |
| 2190 | ning dou xian                    | Yes | 14.74 | 10.91 | 3.83  |
| 2191 | yu dou xian                      | Yes | 3.77  | 1.38  | 2.39  |
| 2192 | xing guo xian                    | Yes | 4.24  | 0.81  | 4.23  |
| 2193 | hui chang xian                   | Yes | 5.53  | 3.82  | 1.72  |
| 2194 | xun wu xian                      | Yes | 7.12  | 5.55  | 2.56  |
| 2195 | shi cheng xian                   | Yes | 9.11  | 6.68  | 2.43  |
| 2196 | rui jin shi                      | Yes | 3.22  | 2.26  | 0.96  |
| 2197 | nan kang shi                     | Yes | 1.24  | 0.31  | 1.10  |
| 2198 | ji an xian                       | Yes | 2.72  | 2.48  | 0.25  |
| 2199 | sui chuan xian                   | Yes | 8.86  | 7.66  | 1.84  |
| 2200 | wan an xian                      | Yes | 11.40 | 0.99  | 10.41 |
| 2201 | yong xin xian                    | Yes | 11.62 | 4.46  | 7.16  |
| 2202 | jing gang shan shi               | Yes | 18.72 | 18.63 | 0.30  |
| 2203 | le an xian                       | Yes | 7.07  | 6.98  | 0.09  |
| 2204 | dong xiang zu zi zhi xian        | Yes | 2.54  | 2.54  | 0.01  |
| 2205 | guang chang xian                 | Yes | 7.59  | 5.52  | 2.08  |
| 2206 | shang rao xian                   | Yes | 4.45  | 3.37  | 1.24  |
| 2207 | heng feng xian                   | Yes | 2.05  | 0.04  | 2.03  |
| 2208 | yu gan xian                      | Yes | 13.64 | 13.08 | 0.59  |
| 2209 | po yang xian                     | Yes | 12.96 | 6.73  | 10.64 |
| 2210 | lan kao xian                     | Yes | 2.65  | 2.65  | 0.00  |
| 2211 | luan chuan xian                  | Yes | 8.75  | 4.55  | 4.94  |
| 2212 | song xian                        | Yes | 8.37  | 6.23  | 5.46  |
| 2213 | ru yang xian                     | Yes | 6.51  | 0.00  | 6.51  |
| 2214 | yi yang xian                     | Yes | 7.35  | 5.66  | 3.81  |
| 2215 | luo ning xian                    | Yes | 7.93  | 5.76  | 4.88  |
| 2216 | lu shan xian                     | Yes | 6.59  | 0.75  | 6.12  |
| 2217 | hua xian                         | Yes | 0.57  | 0.00  | 0.57  |
| 2218 | feng qiu xian                    | Yes | 13.27 | 13.27 | 0.00  |
| 2219 | fan xian                         | Yes | 0.53  | 0.00  | 0.53  |
| 2220 | tai qian xian                    | Yes | 2.72  | 0.00  | 2.72  |
| 2221 | lu shi xian                      | Yes | 12.16 | 10.26 | 4.70  |
| 2222 | nan zhao xian                    | Yes | 8.72  | 3.45  | 5.46  |
| 2223 | zhen ping xian                   | Yes | 4.63  | 4.54  | 0.09  |
| 2224 | nei xiang xian                   | Yes | 20.98 | 12.31 | 13.82 |
| 2225 | xi chuan xian                    | Yes | 37.59 | 27.30 | 10.46 |
| 2226 | she qi xian                      | Yes | 1.52  | 0.00  | 1.52  |
| 2227 | tong bai xian                    | Yes | 9.54  | 8.02  | 4.08  |
| 2228 | min quan xian                    | Yes | 1.85  | 0.00  | 1.85  |
| 2229 | sui xian                         | Yes | 0.96  | 0.00  | 0.96  |
| 2230 | ning ling xian                   | Yes | 4.88  | 0.00  | 4.88  |
| 2231 | zhe cheng xian                   | Yes | 1.35  | 0.00  | 1.35  |
| 2232 | yu cheng xian                    | Yes | 0.18  | 0.00  | 0.18  |
| 2233 | guang shan xian                  | Yes | 2.66  | 0.00  | 2.66  |
| 2234 | xin xian                         | Yes | 28.21 | 23.26 | 11.32 |
| 2235 | shang cheng xian                 | Yes | 24.13 | 14.90 | 12.15 |
| 2236 | gu shi xian                      | Yes | 6.91  | 6.48  | 1.48  |
| 2237 | huang chuan xian                 | Yes | 0.08  | 0.01  | 0.08  |
| 2238 | huai bin xian                    | Yes | 2.75  | 2.75  | 0.00  |
| 2239 | shang shui xian                  | Yes | 0.00  | 0.00  | 0.00  |
| 2240 | shen qiu xian                    | Yes | 0.10  | 0.00  | 0.10  |
| 2241 | dan cheng xian                   | Yes | 0.00  | 0.00  | 0.00  |
| 2242 | huai yang xian                   | Yes | 0.71  | 0.00  | 0.71  |
| 2243 | tai kang xian                    | Yes | 0.00  | 0.00  | 0.00  |
| 2244 | shang cai xian                   | Yes | 0.00  | 0.00  | 0.00  |
| 2245 | ping yu xian                     | Yes | 0.00  | 0.00  | 0.00  |
| 2246 | que shan xian                    | Yes | 5.68  | 0.16  | 5.54  |
| 2247 | xin cai xian                     | Yes | 0.00  | 0.00  | 0.00  |
| 2248 | yang xin xian                    | Yes | 8.87  | 7.36  | 1.51  |
| 2249 | yun xian                         | Yes | 8.46  | 5.65  | 2.88  |
| 2250 | yun xi xian                      | Yes | 12.20 | 6.36  | 5.84  |
| 2251 | zhu shan xian                    | Yes | 19.61 | 12.99 | 6.81  |
| 2252 | zhu xi xian                      | Yes | 16.88 | 13.94 | 7.60  |
| 2253 | fang xian                        | Yes | 12.14 | 5.67  | 6.97  |
| 2254 | dan jiang kou shi                | Yes | 25.72 | 10.79 | 14.95 |
| 2255 | zi gui xian                      | Yes | 8.85  | 0.26  | 8.70  |
| 2256 | zhang yang tu jia zu zi zhi xian | Yes | 22.56 | 4.21  | 18.35 |
| 2257 | wu feng tu jia zu zi zhi xian    | Yes | 13.04 | 5.62  | 10.22 |
| 2258 | bao kang xian                    | Yes | 10.60 | 8.59  | 2.32  |
| 2259 | xiao chang xian                  | Yes | 1.79  | 0.00  | 1.79  |
| 2260 | da wu xian                       | Yes | 0.61  | 0.04  | 0.56  |
| 2261 | tuan feng xian                   | Yes | 1.88  | 1.88  | 0.59  |
| 2262 | hong an xian                     | Yes | 5.93  | 0.00  | 5.93  |
| 2263 | luo tian xian                    | Yes | 26.97 | 5.42  | 26.87 |
| 2264 | ying shan xian                   | Yes | 7.21  | 2.84  | 7.19  |
| 2265 | qi chun xian                     | Yes | 4.18  | 0.00  | 4.18  |
| 2266 | ma cheng shi                     | Yes | 10.80 | 2.93  | 8.36  |
| 2267 | en shi shi                       | Yes | 5.39  | 4.31  | 1.10  |
| 2268 | li chuan shi                     | Yes | 11.32 | 9.92  | 1.42  |
| 2269 | jian shi xian                    | Yes | 0.12  | 0.12  | 0.00  |
| 2270 | ba dong xian                     | Yes | 7.38  | 6.76  | 0.63  |
| 2271 | xuan en xian                     | Yes | 12.78 | 12.57 | 0.20  |
| 2272 | xian feng xian                   | Yes | 10.89 | 5.79  | 5.12  |
| 2273 | lai feng xian                    | Yes | 28.41 | 13.41 | 15.00 |
| 2274 | he feng xian                     | Yes | 12.23 | 7.66  | 4.69  |
| 2275 | shen nong jia lin qu             | Yes | 39.32 | 25.23 | 33.20 |
| 2276 | cha ling xian                    | Yes | 8.93  | 4.00  | 6.85  |
| 2277 | yan ling xian                    | Yes | 12.22 | 11.86 | 4.36  |
| 2278 | xin shao xian                    | Yes | 7.93  | 0.00  | 7.93  |
| 2279 | shao yang xian                   | Yes | 2.92  | 1.87  | 1.05  |
| 2280 | long hui xian                    | Yes | 5.72  | 1.13  | 5.72  |
| 2281 | dong kou xian                    | Yes | 13.25 | 11.08 | 13.25 |
| 2282 | sui ning xian                    | Yes | 6.51  | 4.14  | 6.15  |
| 2283 | xin ning xian                    | Yes | 12.30 | 7.33  | 7.19  |
| 2284 | cheng bu miao zu zi zhi xian     | Yes | 9.01  | 7.28  | 3.06  |
| 2285 | wu gang shi                      | Yes | 2.67  | 0.83  | 2.66  |

|      |                                         |     |       |       |       |
|------|-----------------------------------------|-----|-------|-------|-------|
| 2286 | ping jiang xian                         | Yes | 5.08  | 1.88  | 3.61  |
| 2287 | shi men xian                            | Yes | 20.79 | 16.77 | 4.02  |
| 2288 | ci li xian                              | Yes | 2.36  | 1.42  | 0.96  |
| 2289 | sang zhi xian                           | Yes | 7.86  | 7.08  | 0.82  |
| 2290 | an hua xian                             | Yes | 10.57 | 4.70  | 6.53  |
| 2291 | yi zhang xian                           | Yes | 10.86 | 10.10 | 9.97  |
| 2292 | ru cheng xian                           | Yes | 3.84  | 0.09  | 3.75  |
| 2293 | gui dong xian                           | Yes | 19.11 | 6.27  | 15.95 |
| 2294 | an ren xian                             | Yes | 5.36  | 0.01  | 5.35  |
| 2295 | xin tian xian                           | Yes | 9.36  | 3.34  | 8.78  |
| 2296 | jiang hua yao zu zi zhi xian            | Yes | 2.93  | 1.30  | 1.68  |
| 2297 | zhong fang xian                         | Yes | 8.26  | 4.48  | 3.96  |
| 2298 | yuan ling xian                          | Yes | 8.09  | 2.33  | 5.77  |
| 2299 | chen xi xian                            | Yes | 2.17  | 1.23  | 0.95  |
| 2300 | xu pu xian                              | Yes | 4.85  | 1.33  | 3.53  |
| 2301 | hui tong xian                           | Yes | 7.63  | 6.94  | 0.69  |
| 2302 | ma yang miao zu zi zhi xian             | Yes | 3.00  | 0.39  | 2.99  |
| 2303 | xin huang dong zu zi zhi xian           | Yes | 1.93  | 1.58  | 0.35  |
| 2304 | zhi jiang dong zu zi zhi xian           | Yes | 8.32  | 6.55  | 8.32  |
| 2305 | jing zhou miao zu dong zu zi zhi xian   | Yes | 2.40  | 0.00  | 2.40  |
| 2306 | tong dao dong zu zi zhi xian            | Yes | 8.05  | 6.54  | 4.63  |
| 2307 | xin hua xian                            | Yes | 4.52  | 2.04  | 4.52  |
| 2308 | lian yuan shi                           | Yes | 9.45  | 0.00  | 9.45  |
| 2309 | lu xi xian                              | Yes | 10.23 | 8.79  | 1.45  |
| 2310 | feng huang xian                         | Yes | 13.88 | 10.27 | 5.93  |
| 2311 | hua yuan xian                           | Yes | 11.15 | 0.47  | 10.78 |
| 2312 | bao jing xian                           | Yes | 12.63 | 11.32 | 1.31  |
| 2313 | gu zhang xian                           | Yes | 19.25 | 13.71 | 5.56  |
| 2314 | yong shun xian                          | Yes | 14.91 | 10.64 | 4.97  |
| 2315 | long shan xian                          | Yes | 11.61 | 7.59  | 5.52  |
| 2316 | jiang cheng ha ni zu yi zu zi zhi xian  | Yes | 1.39  | 1.39  | 0.00  |
| 2317 | long an xian                            | Yes | 6.20  | 6.20  | 0.00  |
| 2318 | ma shan xian                            | Yes | 4.21  | 4.20  | 0.01  |
| 2319 | shang lin xian                          | Yes | 10.12 | 10.12 | 0.00  |
| 2320 | rong an xian                            | Yes | 3.51  | 1.94  | 1.58  |
| 2321 | rong shui miao zu zi zhi xian           | Yes | 10.04 | 5.57  | 5.38  |
| 2322 | san jiang dong zu zi zhi xian           | Yes | 0.09  | 0.09  | 0.00  |
| 2323 | qi xing qu                              | Yes | 0.00  | 0.00  | 0.00  |
| 2324 | long sheng ge zu zi zhi xian            | Yes | 6.55  | 4.56  | 1.99  |
| 2325 | zi yuan xian                            | Yes | 43.45 | 5.59  | 43.04 |
| 2326 | tian yang xian                          | Yes | 14.30 | 14.22 | 0.09  |
| 2327 | tian dong xian                          | Yes | 2.65  | 0.00  | 2.65  |
| 2328 | de bao xian                             | Yes | 12.48 | 12.17 | 0.31  |
| 2329 | jing xi xian                            | Yes | 12.73 | 12.52 | 0.21  |
| 2330 | na po xian                              | Yes | 11.72 | 11.64 | 0.08  |
| 2331 | ling yun xian                           | Yes | 10.30 | 9.33  | 0.98  |
| 2332 | le ye xian                              | Yes | 13.36 | 8.52  | 9.70  |
| 2333 | tian lin xian                           | Yes | 3.58  | 3.58  | 0.00  |
| 2334 | xi lin xian                             | Yes | 14.41 | 14.41 | 0.00  |
| 2335 | long lin ge zu zi zhi xian              | Yes | 6.38  | 6.38  | 0.00  |
| 2336 | zhao ping xian                          | Yes | 5.20  | 3.91  | 1.30  |
| 2337 | fu chuan yao zu zi zhi xian             | Yes | 14.66 | 11.34 | 3.32  |
| 2338 | feng shan xian                          | Yes | 9.33  | 0.00  | 9.33  |
| 2339 | dong lan xian                           | Yes | 8.24  | 0.00  | 8.24  |
| 2340 | luo cheng mu lao zu zi zhi xian         | Yes | 4.88  | 2.59  | 2.29  |
| 2341 | huan jiang mao nan zu zi zhi xian       | Yes | 6.62  | 3.02  | 3.60  |
| 2342 | ba ma yao zu zi zhi xian                | Yes | 0.19  | 0.00  | 0.19  |
| 2343 | dou an yao zu zi zhi xian               | Yes | 5.61  | 0.00  | 5.61  |
| 2344 | da hua yao zu zi zhi xian               | Yes | 11.57 | 0.05  | 11.53 |
| 2345 | xin cheng xian                          | Yes | 0.49  | 0.00  | 0.49  |
| 2346 | jìn xiu yao zu zi zhi xian              | Yes | 18.71 | 13.69 | 9.63  |
| 2347 | ning ming xian                          | Yes | 1.17  | 0.78  | 0.40  |
| 2348 | long zhou xian                          | Yes | 11.24 | 10.79 | 0.45  |
| 2349 | da xin xian                             | Yes | 24.27 | 24.02 | 0.25  |
| 2350 | tian deng xian                          | Yes | 0.38  | 0.17  | 0.21  |
| 2351 | wu zhi shan shi                         | Yes | 22.65 | 13.43 | 9.23  |
| 2352 | lin gao xian                            | Yes | 5.94  | 5.93  | 0.02  |
| 2353 | bai sha li zu zi zhi xian               | Yes | 27.45 | 17.69 | 10.25 |
| 2354 | bao ting li zu miao zu zi zhi xian      | Yes | 10.35 | 1.59  | 10.32 |
| 2355 | qiong zhong li zu miao zu zi zhi xian   | Yes | 10.93 | 9.93  | 6.19  |
| 2356 | wan zhou qu                             | Yes | 4.78  | 2.24  | 2.55  |
| 2357 | qian jiang qu                           | Yes | 17.04 | 9.84  | 11.46 |
| 2358 | cheng kou xian                          | Yes | 38.78 | 35.29 | 3.55  |
| 2359 | feng dou xian                           | Yes | 8.21  | 7.44  | 0.93  |
| 2360 | wu long xian                            | Yes | 10.25 | 5.63  | 5.69  |
| 2361 | kai xian                                | Yes | 8.79  | 6.60  | 3.92  |
| 2362 | yun yang xian                           | Yes | 8.34  | 4.32  | 4.44  |
| 2363 | feng jie xian                           | Yes | 9.41  | 6.95  | 4.18  |
| 2364 | wu shan xian                            | Yes | 35.04 | 34.51 | 1.71  |
| 2365 | wu xi xian                              | Yes | 11.70 | 5.68  | 6.29  |
| 2366 | shi zhu tu jia zu zi zhi xian           | Yes | 12.92 | 8.32  | 5.77  |
| 2367 | xiu shan tu jia zu miao zu zi zhi xian  | Yes | 7.37  | 3.99  | 3.39  |
| 2368 | you yang tu jia zu miao zu zi zhi xian  | Yes | 10.86 | 6.04  | 5.29  |
| 2369 | peng shui miao zu tu jia zu zi zhi xian | Yes | 42.35 | 42.10 | 1.31  |
| 2370 | xu yong xian                            | Yes | 7.98  | 7.96  | 0.24  |
| 2371 | gu lin xian                             | Yes | 11.87 | 11.74 | 3.03  |
| 2372 | bei chuan qiang zu zi zhi xian          | Yes | 21.60 | 19.89 | 1.75  |
| 2373 | ping wu xian                            | Yes | 21.41 | 21.24 | 0.21  |
| 2374 | yuan ba qu                              | Yes | 2.00  | 1.15  | 0.85  |
| 2375 | chao tian qu                            | Yes | 9.92  | 8.34  | 3.98  |
| 2376 | wang cang xian                          | Yes | 8.77  | 7.68  | 1.96  |
| 2377 | qing chuan xian                         | Yes | 27.23 | 25.39 | 1.86  |
| 2378 | jian ge xian                            | Yes | 20.27 | 15.80 | 6.82  |
| 2379 | cang xi xian                            | Yes | 4.93  | 3.43  | 1.49  |
| 2380 | mu chuan xian                           | Yes | 6.71  | 2.56  | 4.87  |
| 2381 | ma bian yi zu zi zhi xian               | Yes | 12.37 | 12.29 | 0.08  |
| 2382 | jia ling qu                             | Yes | 9.46  | 9.29  | 0.17  |
| 2383 | nan bu xian                             | Yes | 3.59  | 0.01  | 3.59  |
| 2384 | yi long xian                            | Yes | 0.14  | 0.11  | 0.03  |
| 2385 | lang zhong shi                          | Yes | 19.66 | 16.62 | 3.08  |
| 2386 | ping shan xian                          | Yes | 7.23  | 2.43  | 5.59  |
| 2387 | guang an qu                             | Yes | 0.25  | 0.00  | 0.25  |
| 2388 | xuan han xian                           | Yes | 7.57  | 6.15  | 4.10  |
| 2389 | wan yuan shi                            | Yes | 17.92 | 14.81 | 3.85  |
| 2390 | ba zhou qu                              | Yes | 1.43  | 0.01  | 1.42  |
| 2391 | tong jiang xian                         | Yes | 21.62 | 20.95 | 6.43  |
| 2392 | nan jiang xian                          | Yes | 16.24 | 8.80  | 14.01 |
| 2393 | ping chang xian                         | Yes | 6.53  | 5.32  | 1.21  |
| 2394 | wen chuan xian                          | Yes | 62.65 | 62.39 | 0.35  |

|      |                                           |     |       |       |       |
|------|-------------------------------------------|-----|-------|-------|-------|
| 2395 | li xian                                   | Yes | 37.00 | 36.89 | 0.11  |
| 2396 | mao xian                                  | Yes | 27.50 | 24.78 | 2.99  |
| 2397 | song pan xian                             | Yes | 29.00 | 18.32 | 16.48 |
| 2398 | jiu zhai gou xian                         | Yes | 48.66 | 45.74 | 20.77 |
| 2399 | jin chuan xian                            | Yes | 18.94 | 9.63  | 9.31  |
| 2400 | xiao jin xian                             | Yes | 46.00 | 12.60 | 42.03 |
| 2401 | hei shui xian                             | Yes | 57.88 | 15.27 | 42.62 |
| 2402 | ma er kang xian                           | Yes | 21.76 | 4.45  | 17.30 |
| 2403 | rang tang xian                            | Yes | 31.69 | 31.69 | 0.00  |
| 2404 | a ba xian                                 | Yes | 27.96 | 27.41 | 0.58  |
| 2405 | ruo er gai xian                           | Yes | 53.61 | 53.15 | 0.46  |
| 2406 | hong yuan xian                            | Yes | 13.64 | 13.56 | 0.08  |
| 2407 | kang ding xian                            | Yes | 17.48 | 16.03 | 1.46  |
| 2408 | lu ding xian                              | Yes | 52.19 | 47.86 | 16.27 |
| 2409 | dan ba xian                               | Yes | 23.51 | 22.04 | 1.47  |
| 2410 | jiu long xian                             | Yes | 22.17 | 22.06 | 0.10  |
| 2411 | ya jiang xian                             | Yes | 13.93 | 9.08  | 4.85  |
| 2412 | dao fu xian                               | Yes | 51.53 | 19.18 | 32.37 |
| 2413 | lu huo xian                               | Yes | 67.85 | 67.56 | 0.29  |
| 2414 | gan zi xian                               | Yes | 11.13 | 10.98 | 0.14  |
| 2415 | xin long xian                             | Yes | 35.62 | 35.53 | 0.09  |
| 2416 | de ge xian                                | Yes | 10.79 | 9.65  | 1.14  |
| 2417 | bai yu xian                               | Yes | 77.58 | 29.18 | 54.07 |
| 2418 | shi qu xian                               | Yes | 36.75 | 36.03 | 0.72  |
| 2419 | se da xian                                | Yes | 12.40 | 11.79 | 0.62  |
| 2420 | li tang xian                              | Yes | 35.49 | 35.24 | 0.25  |
| 2421 | ba tang xian                              | Yes | 11.80 | 9.70  | 7.36  |
| 2422 | xiang cheng xian                          | Yes | 11.67 | 8.19  | 3.47  |
| 2423 | dao cheng xian                            | Yes | 39.94 | 39.63 | 0.31  |
| 2424 | de rong xian                              | Yes | 14.66 | 14.66 | 0.00  |
| 2425 | mu li cang zu zi zhi xian                 | Yes | 5.43  | 5.43  | 0.00  |
| 2426 | yan yuan xian                             | Yes | 1.99  | 1.98  | 0.01  |
| 2427 | pu ge xian                                | Yes | 3.42  | 3.42  | 0.00  |
| 2428 | bu tuo xian                               | Yes | 12.73 | 12.73 | 0.00  |
| 2429 | jin yang xian                             | Yes | 16.24 | 16.24 | 0.00  |
| 2430 | zhao jiao xian                            | Yes | 0.18  | 0.01  | 0.17  |
| 2431 | xi de xian                                | Yes | 0.00  | 0.00  | 0.00  |
| 2432 | yue xi xian                               | Yes | 14.79 | 14.76 | 0.03  |
| 2433 | gan luo xian                              | Yes | 16.66 | 13.35 | 3.41  |
| 2434 | mei gu xian                               | Yes | 19.81 | 19.78 | 0.03  |
| 2435 | lei bo xian                               | Yes | 22.19 | 17.08 | 5.11  |
| 2436 | liu zhi te qu                             | Yes | 8.34  | 0.00  | 8.34  |
| 2437 | shui cheng xian                           | Yes | 6.84  | 0.80  | 6.59  |
| 2438 | pan xian                                  | Yes | 2.08  | 0.00  | 2.08  |
| 2439 | tong zi xian                              | Yes | 7.68  | 7.43  | 0.37  |
| 2440 | zheng an xian                             | Yes | 9.74  | 9.26  | 0.48  |
| 2441 | dao zhen yi lao zu miao zu zi zhi xian    | Yes | 13.22 | 12.36 | 0.86  |
| 2442 | wu chuan yi lao zu miao zu zi zhi xian    | Yes | 6.64  | 5.28  | 1.36  |
| 2443 | feng gang xian                            | Yes | 6.72  | 4.48  | 2.46  |
| 2444 | mei tan xian                              | Yes | 10.77 | 10.27 | 0.51  |
| 2445 | xi shui xian                              | Yes | 16.06 | 14.43 | 4.69  |
| 2446 | chi shui shi                              | Yes | 31.06 | 18.56 | 19.91 |
| 2447 | xi xiu qu                                 | Yes | 7.24  | 0.00  | 7.24  |
| 2448 | ping ba xian                              | Yes | 0.17  | 0.00  | 0.17  |
| 2449 | pu ding xian                              | Yes | 0.00  | 0.00  | 0.00  |
| 2450 | zhen ning bu yi zu miao zu zi zhi xian    | Yes | 1.15  | 0.00  | 1.15  |
| 2451 | guan ling bu yi zu miao zu zi zhi xian    | Yes | 5.15  | 0.00  | 5.15  |
| 2452 | zi yun miao zu bu yi zu zi zhi xian       | Yes | 0.11  | 0.00  | 0.11  |
| 2453 | tong ren shi                              | Yes | 0.76  | 0.09  | 0.70  |
| 2454 | jiang kou xian                            | Yes | 16.28 | 14.78 | 1.50  |
| 2455 | yu ping dong zu zi zhi xian               | Yes | 2.21  | 0.00  | 2.21  |
| 2456 | shi qian xian                             | Yes | 7.88  | 7.10  | 0.78  |
| 2457 | si nan xian                               | Yes | 12.47 | 7.84  | 5.45  |
| 2458 | yin jiang tu jia zu miao zu zi zhi xian   | Yes | 23.77 | 22.64 | 1.13  |
| 2459 | de jiang xian                             | Yes | 0.96  | 0.01  | 0.94  |
| 2460 | yan he tu jia zu zi zhi xian              | Yes | 10.67 | 8.48  | 2.19  |
| 2461 | song tao miao zu zi zhi xian              | Yes | 1.44  | 1.02  | 0.41  |
| 2462 | wan shan te qu                            | Yes | 3.90  | 0.00  | 3.90  |
| 2463 | xing ren xian                             | Yes | 1.26  | 1.26  | 0.00  |
| 2464 | pu an xian                                | Yes | 4.78  | 3.92  | 0.86  |
| 2465 | qing long xian                            | Yes | 3.57  | 0.02  | 3.55  |
| 2466 | zhen feng xian                            | Yes | 2.63  | 1.77  | 0.86  |
| 2467 | wang mo xian                              | Yes | 4.22  | 3.51  | 0.71  |
| 2468 | ce heng xian                              | Yes | 3.68  | 2.09  | 1.59  |
| 2469 | an long xian                              | Yes | 6.00  | 1.42  | 4.59  |
| 2470 | da fang xian                              | Yes | 4.71  | 2.21  | 4.52  |
| 2471 | qian xi xian                              | Yes | 5.70  | 0.78  | 5.68  |
| 2472 | zhi jin xian                              | Yes | 4.58  | 0.00  | 4.58  |
| 2473 | na yong xian                              | Yes | 5.37  | 4.67  | 1.12  |
| 2474 | wei ning yi zu hui zu miao zu zi zhi xian | Yes | 3.64  | 3.58  | 0.06  |
| 2475 | he zhang xian                             | Yes | 1.37  | 0.00  | 1.37  |
| 2476 | huang ping xian                           | Yes | 18.48 | 7.97  | 12.84 |
| 2477 | shi bing xian                             | Yes | 7.90  | 1.38  | 6.52  |
| 2478 | san sui xian                              | Yes | 0.00  | 0.00  | 0.00  |
| 2479 | zhen yuan xian                            | Yes | 0.75  | 0.09  | 0.66  |
| 2480 | cen gong xian                             | Yes | 16.22 | 16.22 | 0.00  |
| 2481 | tian zhu xian                             | Yes | 0.13  | 0.00  | 0.13  |
| 2482 | jin ping xian                             | Yes | 10.62 | 3.25  | 8.77  |
| 2483 | jian he xian                              | Yes | 10.14 | 8.40  | 2.35  |
| 2484 | tai jiang xian                            | Yes | 25.87 | 24.39 | 8.75  |
| 2485 | li ping xian                              | Yes | 7.39  | 6.89  | 1.33  |
| 2486 | rong jiang xian                           | Yes | 11.15 | 11.13 | 0.01  |
| 2487 | cong jiang xian                           | Yes | 8.68  | 7.78  | 0.90  |
| 2488 | lei shan xian                             | Yes | 31.23 | 29.19 | 7.66  |
| 2489 | ma jiang xian                             | Yes | 7.06  | 7.06  | 4.68  |
| 2490 | dan zhai xian                             | Yes | 5.71  | 5.42  | 2.37  |
| 2491 | li bo xian                                | Yes | 27.94 | 27.76 | 1.63  |
| 2492 | gui ding xian                             | Yes | 3.72  | 1.82  | 1.93  |
| 2493 | weng an xian                              | Yes | 6.79  | 6.45  | 2.72  |
| 2494 | du shan xian                              | Yes | 10.77 | 9.36  | 1.43  |
| 2495 | ping tang xian                            | Yes | 5.97  | 0.04  | 5.92  |
| 2496 | luo dian xian                             | Yes | 3.92  | 0.91  | 3.01  |
| 2497 | zhang shun xian                           | Yes | 3.24  | 3.22  | 0.02  |
| 2498 | long li xian                              | Yes | 7.19  | 4.80  | 4.11  |
| 2499 | hui shui xian                             | Yes | 2.07  | 1.70  | 0.37  |
| 2500 | san dou shui zu zi zhi xian               | Yes | 3.02  | 1.14  | 2.02  |
| 2501 | dong chuan qu                             | Yes | 15.10 | 5.02  | 10.08 |
| 2502 | lu quan yi zu miao zu zi zhi xian         | Yes | 1.69  | 1.69  | 0.00  |
| 2503 | xun dian hui zu yi zu zi zhi xian         | Yes | 2.16  | 2.01  | 0.15  |

|      |                                            |     |       |       |       |
|------|--------------------------------------------|-----|-------|-------|-------|
| 2504 | shi zong xian                              | Yes | 20.90 | 20.90 | 0.00  |
| 2505 | luo ping xian                              | Yes | 21.26 | 19.40 | 3.92  |
| 2506 | fu yuan xian                               | Yes | 0.62  | 0.42  | 0.58  |
| 2507 | hui ze xian                                | Yes | 4.91  | 4.80  | 0.11  |
| 2508 | xuan wei shi                               | Yes | 14.92 | 13.39 | 1.52  |
| 2509 | long yang qu                               | Yes | 8.58  | 8.17  | 0.41  |
| 2510 | shi dian xian                              | Yes | 0.01  | 0.01  | 0.00  |
| 2511 | long ling xian                             | Yes | 2.03  | 2.03  | 0.00  |
| 2512 | chang ning xian                            | Yes | 3.70  | 3.59  | 0.11  |
| 2513 | zhao yang qu                               | Yes | 6.34  | 6.34  | 0.00  |
| 2514 | lu dian xian                               | Yes | 3.41  | 3.41  | 0.00  |
| 2515 | qiao jia xian                              | Yes | 6.41  | 6.41  | 0.00  |
| 2516 | yan jin xian                               | Yes | 8.53  | 3.18  | 5.48  |
| 2517 | da guan xian                               | Yes | 5.67  | 5.66  | 0.01  |
| 2518 | yong shan xian                             | Yes | 10.02 | 10.02 | 0.00  |
| 2519 | sui jiang xian                             | Yes | 15.54 | 15.54 | 0.01  |
| 2520 | zhen xiong xian                            | Yes | 0.79  | 0.78  | 0.01  |
| 2521 | yi liang xian                              | Yes | 3.86  | 3.32  | 0.53  |
| 2522 | wei xin xian                               | Yes | 5.29  | 0.37  | 5.16  |
| 2523 | yu long na xi zu zi zhi xian               | Yes | 16.89 | 5.15  | 15.60 |
| 2524 | yong sheng xian                            | Yes | 0.00  | 0.00  | 0.00  |
| 2525 | ning lang yi zu zi zhi xian                | Yes | 1.36  | 1.36  | 0.00  |
| 2526 | ning er ha ni zu yi zu zi zhi xian         | Yes | 1.61  | 0.74  | 0.87  |
| 2527 | mo jiang ha ni zu zi zhi xian              | Yes | 3.63  | 1.83  | 1.80  |
| 2528 | jing dong yi zu zi zhi xian                | Yes | 7.98  | 7.98  | 0.00  |
| 2529 | jing gu dai zu yi zu zi zhi xian           | Yes | 1.42  | 1.01  | 0.41  |
| 2530 | zhen yuan                                  | Yes | 2.57  | 2.52  | 0.05  |
| 2531 | meng lian                                  | Yes | 0.04  | 0.04  | 0.00  |
| 2532 | lan cang la hu zu zi zhi xian              | Yes | 1.95  | 1.05  | 0.90  |
| 2533 | xi meng wa zu zi zhi xian                  | Yes | 3.51  | 3.51  | 0.00  |
| 2534 | lin xiang qu                               | Yes | 11.17 | 9.70  | 1.76  |
| 2535 | feng qing xian                             | Yes | 6.22  | 6.22  | 0.00  |
| 2536 | yun xian                                   | Yes | 3.35  | 3.35  | 0.00  |
| 2537 | yong de xian                               | Yes | 8.35  | 8.35  | 0.00  |
| 2538 | zhen kang xian                             | Yes | 14.87 | 14.87 | 0.00  |
| 2539 | shuang jiang                               | Yes | 13.48 | 11.20 | 2.50  |
| 2540 | geng ma dai zu wa zu zi zhi xian           | Yes | 8.31  | 8.31  | 0.00  |
| 2541 | cang yuan wa zu zi zhi xian                | Yes | 11.22 | 11.22 | 0.00  |
| 2542 | shuang bai xian                            | Yes | 7.45  | 7.45  | 0.00  |
| 2543 | mou ding xian                              | Yes | 20.32 | 20.32 | 0.00  |
| 2544 | nan hua xian                               | Yes | 12.82 | 12.82 | 0.00  |
| 2545 | yao an xian                                | Yes | 40.62 | 40.62 | 0.00  |
| 2546 | da yao xian                                | Yes | 0.33  | 0.33  | 0.00  |
| 2547 | yong ren xian                              | Yes | 1.98  | 0.13  | 1.85  |
| 2548 | wu ding xian                               | Yes | 0.48  | 0.48  | 0.00  |
| 2549 | ping bian miao zu zi zhi xian              | Yes | 8.22  | 7.66  | 0.56  |
| 2550 | shi ping xian                              | Yes | 1.26  | 0.00  | 1.26  |
| 2551 | lu xi xian                                 | Yes | 3.89  | 0.04  | 3.85  |
| 2552 | yuan yang xian                             | Yes | 11.44 | 7.26  | 4.18  |
| 2553 | hong he xian                               | Yes | 9.57  | 8.52  | 1.06  |
| 2554 | jin ping miao zu yao zu dai zu zi zhi xian | Yes | 13.09 | 12.74 | 0.35  |
| 2555 | li chun xian                               | Yes | 20.49 | 19.96 | 0.53  |
| 2556 | wen shan shi                               | Yes | 8.05  | 7.83  | 0.22  |
| 2557 | yan shan xian                              | Yes | 0.46  | 0.00  | 0.46  |
| 2558 | xi chou xian                               | Yes | 4.20  | 2.60  | 1.59  |
| 2559 | ma li po xian                              | Yes | 9.86  | 9.86  | 0.00  |
| 2560 | ma guan xian                               | Yes | 3.07  | 3.06  | 0.01  |
| 2561 | qiu bei xian                               | Yes | 2.35  | 2.14  | 0.20  |
| 2562 | guang nan xian                             | Yes | 1.21  | 0.74  | 0.47  |
| 2563 | fu ning xian                               | Yes | 3.23  | 3.23  | 0.00  |
| 2564 | meng hai xian                              | Yes | 13.92 | 13.92 | 0.00  |
| 2565 | meng la xian                               | Yes | 26.30 | 26.30 | 0.00  |
| 2566 | yang bi yi zu zi zhi xian                  | Yes | 11.25 | 11.04 | 9.46  |
| 2567 | xiang yun xian                             | Yes | 4.24  | 0.63  | 3.94  |
| 2568 | bin chuan xian                             | Yes | 0.09  | 0.00  | 0.09  |
| 2569 | mi du xian                                 | Yes | 18.96 | 16.07 | 3.03  |
| 2570 | nan jian yi zu zi zhi xian                 | Yes | 6.78  | 6.78  | 0.47  |
| 2571 | wei shan yi zu hui zu zi zhi xian          | Yes | 6.38  | 1.50  | 5.04  |
| 2572 | yong ping xian                             | Yes | 4.92  | 4.90  | 0.46  |
| 2573 | yun long xian                              | Yes | 3.29  | 3.29  | 0.00  |
| 2574 | er yuan xian                               | Yes | 11.82 | 11.39 | 2.05  |
| 2575 | jian chuan xian                            | Yes | 3.43  | 3.38  | 0.05  |
| 2576 | he qing xian                               | Yes | 1.59  | 1.47  | 0.11  |
| 2577 | mang shi                                   | Yes | 0.35  | 0.00  | 0.35  |
| 2578 | liang he xian                              | Yes | 2.98  | 2.70  | 0.28  |
| 2579 | ying jiang xian                            | Yes | 7.79  | 7.39  | 0.40  |
| 2580 | long chuan xian                            | Yes | 7.84  | 4.10  | 3.74  |
| 2581 | lu shui xian                               | Yes | 17.32 | 17.32 | 0.00  |
| 2582 | fu gong xian                               | Yes | 10.39 | 10.39 | 0.00  |
| 2583 | gong shan du long zu nu zu zi zhi xian     | Yes | 55.03 | 55.03 | 0.00  |
| 2584 | lan ping bai zu pu mi zu zi zhi xian       | Yes | 17.58 | 17.44 | 0.74  |
| 2585 | xiang ge li la xian                        | Yes | 3.43  | 3.43  | 0.00  |
| 2586 | de qin xian                                | Yes | 30.43 | 29.96 | 0.47  |
| 2587 | wei xi li su zu zi zhi xian                | Yes | 13.63 | 13.63 | 0.00  |
| 2588 | cheng guan qu                              | Yes | 4.07  | 2.74  | 1.34  |
| 2589 | lin zhou xian                              | Yes | 30.34 | 30.34 | 8.66  |
| 2590 | dang xiong xian                            | Yes | 24.19 | 23.52 | 0.67  |
| 2591 | ni mu xian                                 | Yes | 1.91  | 0.02  | 1.89  |
| 2592 | qu shui xian                               | Yes | 0.49  | 0.49  | 0.00  |
| 2593 | dui long de qing xian                      | Yes | 0.02  | 0.02  | 0.00  |
| 2594 | da zi xian                                 | Yes | 29.99 | 29.99 | 0.00  |
| 2595 | mo zhu gong ka xian                        | Yes | 3.61  | 3.61  | 0.00  |
| 2596 | chang dou xian                             | Yes | 6.60  | 6.60  | 0.00  |
| 2597 | jiang da xian                              | Yes | 0.76  | 0.74  | 0.01  |
| 2598 | gong jiao xian                             | Yes | 8.09  | 8.04  | 0.62  |
| 2599 | lei wu qi xian                             | Yes | 22.06 | 21.89 | 0.17  |
| 2600 | ding qing xian                             | Yes | 1.63  | 1.04  | 0.59  |
| 2601 | cha ya xian                                | Yes | 0.02  | 0.02  | 0.00  |
| 2602 | ba xiu xian                                | Yes | 10.40 | 1.96  | 9.01  |
| 2603 | zuo gong xian                              | Yes | 0.00  | 0.00  | 0.00  |
| 2604 | mang kang xian                             | Yes | 19.11 | 19.11 | 0.00  |
| 2605 | luo long xian                              | Yes | 0.66  | 0.66  | 0.40  |
| 2606 | bian ba xian                               | Yes | 0.76  | 0.75  | 0.38  |
| 2607 | nai dong xian                              | Yes | 0.00  | 0.00  | 0.00  |
| 2608 | zha nang xian                              | Yes | 0.00  | 0.00  | 0.00  |
| 2609 | gong ga xian                               | Yes | 10.10 | 6.43  | 3.67  |
| 2610 | sang ri xian                               | Yes | 0.05  | 0.00  | 0.05  |
| 2611 | qiong jie xian                             | Yes | 1.21  | 0.00  | 1.21  |
| 2612 | qu song xian                               | Yes | 2.16  | 0.00  | 2.16  |



|      |                       |     |       |       |       |
|------|-----------------------|-----|-------|-------|-------|
| 2613 | cuo mei xian          | Yes | 0.00  | 0.00  | 0.00  |
| 2614 | luo zha xian          | Yes | 0.00  | 0.00  | 0.00  |
| 2615 | jia cha xian          | Yes | 0.67  | 0.02  | 0.65  |
| 2616 | long zi xian          | Yes | 0.22  | 0.22  | 0.00  |
| 2617 | cuo na xian           | Yes | 0.23  | 0.00  | 0.23  |
| 2618 | lang ka zi xian       | Yes | 22.82 | 22.82 | 0.00  |
| 2619 | ri ka ze shi          | Yes | 20.20 | 19.81 | 0.39  |
| 2620 | nan mu lin xian       | Yes | 5.34  | 5.34  | 0.00  |
| 2621 | jiang zi xian         | Yes | 0.00  | 0.00  | 0.00  |
| 2622 | ding ri xian          | Yes | 97.58 | 97.58 | 0.00  |
| 2623 | sa jia xian           | Yes | 0.39  | 0.39  | 0.00  |
| 2624 | la zi xian            | Yes | 25.72 | 25.72 | 0.00  |
| 2625 | ang ren xian          | Yes | 2.50  | 2.38  | 0.12  |
| 2626 | xie tong men xian     | Yes | 1.95  | 1.95  | 0.00  |
| 2627 | bai lang xian         | Yes | 0.70  | 0.00  | 0.70  |
| 2628 | ren bu xian           | Yes | 0.00  | 0.00  | 0.00  |
| 2629 | kang ma xian          | Yes | 1.40  | 0.00  | 1.40  |
| 2630 | ding jie xian         | Yes | 63.03 | 63.03 | 0.00  |
| 2631 | zhong ba xian         | Yes | 0.00  | 0.00  | 0.00  |
| 2632 | ya dong xian          | Yes | 5.56  | 0.00  | 5.56  |
| 2633 | ji long xian          | Yes | 98.01 | 98.01 | 0.00  |
| 2634 | nie la mu xian        | Yes | 97.04 | 97.04 | 0.00  |
| 2635 | sa ga xian            | Yes | 0.01  | 0.01  | 0.00  |
| 2636 | gang ba xian          | Yes | 0.13  | 0.13  | 0.00  |
| 2637 | na qu xian            | Yes | 18.01 | 17.89 | 0.11  |
| 2638 | jia li xian           | Yes | 6.61  | 6.27  | 0.35  |
| 2639 | bi ru xian            | Yes | 1.11  | 0.59  | 0.53  |
| 2640 | nie rong xian         | Yes | 0.12  | 0.12  | 0.00  |
| 2641 | an duo xian           | Yes | 43.05 | 43.05 | 0.00  |
| 2642 | shen zha xian         | Yes | 35.78 | 35.78 | 0.00  |
| 2643 | suo xian              | Yes | 0.01  | 0.00  | 0.01  |
| 2644 | ban ge xian           | Yes | 40.85 | 40.75 | 0.10  |
| 2645 | ba qing xian          | Yes | 0.14  | 0.09  | 0.05  |
| 2646 | ni ma xian            | Yes | 69.24 | 68.53 | 0.71  |
| 2647 | pu lan xian           | Yes | 20.28 | 7.65  | 12.67 |
| 2648 | zha da xian           | Yes | 22.75 | 22.75 | 1.86  |
| 2649 | ga er xian            | Yes | 0.40  | 0.00  | 0.40  |
| 2650 | ri tu xian            | Yes | 49.62 | 49.48 | 0.66  |
| 2651 | ge ji xian            | Yes | 16.47 | 16.37 | 0.10  |
| 2652 | gai ze xian           | Yes | 80.34 | 80.34 | 0.00  |
| 2653 | cuo qin xian          | Yes | 5.27  | 5.27  | 0.00  |
| 2654 | lin zhi xian          | Yes | 93.12 | 70.79 | 36.21 |
| 2655 | gong bu jiang da xian | Yes | 51.09 | 37.18 | 32.88 |
| 2656 | mi lin xian           | Yes | 92.65 | 90.93 | 12.97 |
| 2657 | mo tuo xian           | Yes | 17.85 | 17.85 | 0.00  |
| 2658 | bo mi xian            | Yes | 19.65 | 8.12  | 13.54 |
| 2659 | cha yu xian           | Yes | 3.14  | 3.13  | 0.01  |
| 2660 | lang xian             | Yes | 22.76 | 22.76 | 0.00  |
| 2661 | zhou zhi xian         | Yes | 47.52 | 34.23 | 14.08 |
| 2662 | yin tai qu            | Yes | 4.18  | 0.00  | 4.18  |
| 2663 | yao zhou qu           | Yes | 14.69 | 9.64  | 8.18  |
| 2664 | yi jun1 xian          | Yes | 17.82 | 16.77 | 1.05  |
| 2665 | fu feng xian          | Yes | 16.65 | 15.01 | 1.65  |
| 2666 | long xian             | Yes | 6.40  | 1.10  | 5.41  |
| 2667 | qian yang xian        | Yes | 6.19  | 5.64  | 0.55  |
| 2668 | lin you xian          | Yes | 6.33  | 6.31  | 0.02  |
| 2669 | tai bai xian          | Yes | 31.08 | 28.65 | 2.95  |
| 2670 | yong shou xian        | Yes | 18.84 | 18.56 | 3.53  |
| 2671 | zhang wu xian         | Yes | 0.00  | 0.00  | 0.00  |
| 2672 | xun yi xian           | Yes | 22.39 | 15.64 | 6.78  |
| 2673 | chun hua xian         | Yes | 6.51  | 4.01  | 2.50  |
| 2674 | he yang xian          | Yes | 11.90 | 9.72  | 2.18  |
| 2675 | cheng cheng xian      | Yes | 0.01  | 0.00  | 0.01  |
| 2676 | pu cheng xian         | Yes | 0.98  | 0.00  | 0.98  |
| 2677 | bai shui xian         | Yes | 2.09  | 0.00  | 2.09  |
| 2678 | fu ping xian          | Yes | 1.84  | 0.00  | 1.84  |
| 2679 | yan zhang xian        | Yes | 0.00  | 0.00  | 0.00  |
| 2680 | yan chuan xian        | Yes | 4.32  | 0.00  | 4.32  |
| 2681 | yi chuan xian         | Yes | 14.95 | 13.46 | 1.50  |
| 2682 | nan zheng xian        | Yes | 10.02 | 1.46  | 9.03  |
| 2683 | cheng gu xian         | Yes | 3.04  | 2.94  | 0.11  |
| 2684 | yang xian             | Yes | 19.54 | 19.54 | 0.00  |
| 2685 | xi xiang xian         | Yes | 13.07 | 12.45 | 0.62  |
| 2686 | mian xian             | Yes | 3.38  | 1.29  | 2.09  |
| 2687 | ning qiang xian       | Yes | 4.38  | 3.05  | 1.34  |
| 2688 | lue yang xian         | Yes | 11.76 | 11.07 | 2.12  |
| 2689 | zhen ba xian          | Yes | 1.48  | 0.18  | 1.31  |
| 2690 | liu ba xian           | Yes | 12.21 | 9.82  | 2.39  |
| 2691 | fo ping xian          | Yes | 33.47 | 33.47 | 0.00  |
| 2692 | heng shan xian        | Yes | 2.14  | 2.13  | 0.02  |
| 2693 | ding bian xian        | Yes | 1.84  | 0.41  | 1.43  |
| 2694 | sui de xian           | Yes | 0.55  | 0.00  | 0.55  |
| 2695 | mi zhi xian           | Yes | 0.00  | 0.00  | 0.00  |
| 2696 | jia xian              | Yes | 2.55  | 0.00  | 2.55  |
| 2697 | wu bao xian           | Yes | 0.00  | 0.00  | 0.00  |
| 2698 | qing jian xian        | Yes | 2.51  | 0.00  | 2.51  |
| 2699 | zi zhou xian          | Yes | 0.00  | 0.00  | 0.00  |
| 2700 | han bin qu            | Yes | 2.89  | 2.15  | 0.74  |
| 2701 | han yin xian          | Yes | 6.21  | 0.00  | 6.21  |
| 2702 | shi quan xian         | Yes | 9.52  | 0.00  | 9.51  |
| 2703 | ning shan xian        | Yes | 20.13 | 16.24 | 4.42  |
| 2704 | zi yang xian          | Yes | 0.26  | 0.00  | 0.25  |
| 2705 | lan gao xian          | Yes | 7.44  | 0.12  | 7.32  |
| 2706 | ping li xian          | Yes | 3.09  | 1.52  | 1.57  |
| 2707 | zhen ping xian        | Yes | 17.98 | 16.13 | 1.85  |
| 2708 | xun yang xian         | Yes | 0.04  | 0.00  | 0.04  |
| 2709 | bai he xian           | Yes | 2.31  | 0.00  | 2.31  |
| 2710 | shang zhou qu         | Yes | 3.83  | 0.00  | 3.83  |
| 2711 | luo nan xian          | Yes | 2.52  | 2.06  | 0.46  |
| 2712 | dan feng xian         | Yes | 6.51  | 3.80  | 2.73  |
| 2713 | shang nan xian        | Yes | 9.93  | 6.55  | 4.54  |
| 2714 | shan yang xian        | Yes | 6.66  | 6.21  | 0.97  |
| 2715 | zhen an xian          | Yes | 3.33  | 3.25  | 1.12  |
| 2716 | zha shui xian         | Yes | 6.95  | 3.65  | 3.45  |
| 2717 | yong deng xian        | Yes | 8.06  | 7.99  | 1.34  |
| 2718 | gao lan xian          | Yes | 0.32  | 0.00  | 0.32  |
| 2719 | yu zhong xian         | Yes | 9.14  | 9.11  | 9.14  |
| 2720 | jing yuan xian        | Yes | 1.81  | 1.51  | 0.92  |
| 2721 | hui ning xian         | Yes | 0.15  | 0.09  | 0.15  |

|      |                                    |     |       |       |       |
|------|------------------------------------|-----|-------|-------|-------|
| 2722 | jing tai xian                      | Yes | 3.25  | 2.46  | 1.48  |
| 2723 | mai ji qu                          | Yes | 17.13 | 1.06  | 16.08 |
| 2724 | qing shui xian                     | Yes | 2.15  | 0.00  | 2.15  |
| 2725 | qin an xian                        | Yes | 0.96  | 0.00  | 0.96  |
| 2726 | gan gu xian                        | Yes | 0.84  | 0.00  | 0.84  |
| 2727 | wu shan xian                       | Yes | 5.72  | 0.04  | 5.69  |
| 2728 | zhang jia chuan hui zu zi zhi xian | Yes | 4.82  | 0.02  | 4.80  |
| 2729 | gu lang xian                       | Yes | 1.87  | 1.87  | 0.00  |
| 2730 | tian zhu cang zu zi zhi xian       | Yes | 60.63 | 58.18 | 21.96 |
| 2731 | kong dong qu                       | Yes | 9.12  | 7.94  | 8.45  |
| 2732 | jing chuan xian                    | Yes | 0.00  | 0.00  | 0.00  |
| 2733 | ling tai xian                      | Yes | 0.01  | 0.00  | 0.01  |
| 2734 | zhuang lang xian                   | Yes | 12.94 | 0.03  | 12.91 |
| 2735 | jing ning xian                     | Yes | 0.00  | 0.00  | 0.00  |
| 2736 | qing cheng xian                    | Yes | 0.22  | 0.00  | 0.22  |
| 2737 | huan xian                          | Yes | 0.02  | 0.00  | 0.02  |
| 2738 | hua chi xian                       | Yes | 16.91 | 16.85 | 1.05  |
| 2739 | he shui xian                       | Yes | 34.78 | 33.70 | 11.25 |
| 2740 | zheng ning xian                    | Yes | 28.66 | 28.66 | 7.34  |
| 2741 | ning xian                          | Yes | 15.07 | 14.43 | 5.98  |
| 2742 | zhen yuan xian                     | Yes | 0.10  | 0.00  | 0.10  |
| 2743 | an ding qu                         | Yes | 0.05  | 0.00  | 0.05  |
| 2744 | tong wei xian                      | Yes | 1.60  | 0.00  | 1.60  |
| 2745 | long xi xian                       | Yes | 0.90  | 0.24  | 0.70  |
| 2746 | wei yuan xian                      | Yes | 6.71  | 0.01  | 6.71  |
| 2747 | lin tao xian                       | Yes | 1.12  | 0.20  | 1.12  |
| 2748 | zhang xian                         | Yes | 11.33 | 2.20  | 10.11 |
| 2749 | min xian                           | Yes | 18.31 | 18.15 | 0.16  |
| 2750 | wu dou qu                          | Yes | 16.81 | 14.42 | 2.39  |
| 2751 | cheng xian                         | Yes | 37.68 | 34.99 | 10.77 |
| 2752 | wen xian                           | Yes | 49.76 | 46.55 | 3.21  |
| 2753 | dang chang xian                    | Yes | 13.00 | 0.01  | 12.98 |
| 2754 | kang xian                          | Yes | 2.88  | 1.82  | 1.13  |
| 2755 | xi he xian                         | Yes | 0.14  | 0.14  | 0.00  |
| 2756 | li xian                            | Yes | 6.86  | 2.61  | 4.25  |
| 2757 | hui xian                           | Yes | 7.53  | 5.88  | 6.86  |
| 2758 | liang dang xian                    | Yes | 20.81 | 17.00 | 15.14 |
| 2759 | lin xia shi                        | Yes | 3.19  | 0.00  | 3.19  |
| 2760 | lin xia xian                       | Yes | 21.53 | 21.50 | 0.03  |
| 2761 | kang le xian                       | Yes | 24.34 | 24.31 | 4.16  |
| 2762 | yong jing xian                     | Yes | 11.10 | 7.61  | 6.67  |
| 2763 | guang he xian                      | Yes | 0.52  | 0.00  | 0.52  |
| 2764 | he zheng xian                      | Yes | 54.93 | 38.65 | 28.02 |
| 2765 | ji shi shan xian                   | Yes | 12.75 | 2.00  | 10.81 |
| 2766 | he zuo shi                         | Yes | 11.51 | 9.17  | 4.43  |
| 2767 | lin tan xian                       | Yes | 23.70 | 11.13 | 15.31 |
| 2768 | zhuo ni xian                       | Yes | 60.57 | 48.64 | 25.28 |
| 2769 | zhou qu xian                       | Yes | 42.21 | 35.87 | 12.07 |
| 2770 | die bu xian                        | Yes | 59.34 | 41.63 | 20.52 |
| 2771 | ma qu xian                         | Yes | 24.29 | 24.27 | 0.01  |
| 2772 | lu qu xian                         | Yes | 57.55 | 57.55 | 5.91  |
| 2773 | xia he xian                        | Yes | 0.96  | 0.05  | 0.91  |
| 2774 | da tong hui zu tu zu zi zhi xian   | Yes | 32.62 | 30.20 | 2.42  |
| 2775 | huang zhong xian                   | Yes | 21.67 | 0.00  | 21.67 |
| 2776 | huang yuan xian                    | Yes | 2.26  | 0.00  | 2.26  |
| 2777 | ping an xian                       | Yes | 5.15  | 0.00  | 5.15  |
| 2778 | min he hui zu tu zu zi zhi xian    | Yes | 12.71 | 0.02  | 12.71 |
| 2779 | le dou xian                        | Yes | 16.94 | 0.39  | 16.55 |
| 2780 | hu zhu tu zu zi zhi xian           | Yes | 42.88 | 0.10  | 42.88 |
| 2781 | hua long hui zu zi zhi xian        | Yes | 7.35  | 2.48  | 5.17  |
| 2782 | xun hua sa la zu zi zhi xian       | Yes | 5.95  | 5.90  | 0.19  |
| 2783 | men yuan hui zu zi zhi xian        | Yes | 36.85 | 13.67 | 30.44 |
| 2784 | qi lian xian                       | Yes | 23.81 | 17.93 | 6.39  |
| 2785 | hai yan xian                       | Yes | 16.01 | 12.68 | 4.75  |
| 2786 | gang cha xian                      | Yes | 3.08  | 2.63  | 0.45  |
| 2787 | tong ren xian                      | Yes | 5.39  | 5.39  | 0.02  |
| 2788 | jian zha xian                      | Yes | 9.79  | 0.00  | 9.79  |
| 2789 | ze ku xian                         | Yes | 48.98 | 37.94 | 11.27 |
| 2790 | he nan meng gu zu zi zhi xian      | Yes | 9.70  | 4.01  | 5.70  |
| 2791 | gong he xian                       | Yes | 26.89 | 26.88 | 0.82  |
| 2792 | tong de xian                       | Yes | 31.71 | 27.57 | 5.49  |
| 2793 | gui de xian                        | Yes | 8.24  | 0.01  | 8.23  |
| 2794 | xing hai xian                      | Yes | 39.01 | 39.01 | 0.00  |
| 2795 | gui nan xian                       | Yes | 1.35  | 0.17  | 1.18  |
| 2796 | ma qin xian                        | Yes | 41.65 | 41.63 | 7.80  |
| 2797 | ban ma xian                        | Yes | 39.57 | 39.30 | 0.27  |
| 2798 | gan de xian                        | Yes | 5.74  | 3.93  | 2.75  |
| 2799 | da ri xian                         | Yes | 3.21  | 2.64  | 0.57  |
| 2800 | jiu zhi xian                       | Yes | 39.89 | 39.77 | 12.31 |
| 2801 | ma duo xian                        | Yes | 74.15 | 72.11 | 2.04  |
| 2802 | yu shu xian                        | Yes | 43.58 | 42.78 | 0.81  |
| 2803 | za duo xian                        | Yes | 80.76 | 80.76 | 0.00  |
| 2804 | cheng duo xian                     | Yes | 43.42 | 43.42 | 0.00  |
| 2805 | zhi duo xian                       | Yes | 86.59 | 86.59 | 0.00  |
| 2806 | nang qian xian                     | Yes | 83.00 | 83.00 | 0.00  |
| 2807 | qu ma lai xian                     | Yes | 75.55 | 75.07 | 0.48  |
| 2808 | ge er mu shi                       | Yes | 9.93  | 8.97  | 0.96  |
| 2809 | de ling ha shi                     | Yes | 18.16 | 16.59 | 4.08  |
| 2810 | wu lan xian                        | Yes | 1.76  | 0.00  | 1.76  |
| 2811 | dou lan xian                       | Yes | 7.46  | 6.91  | 0.55  |
| 2812 | tian jun4 xian                     | Yes | 13.75 | 13.47 | 0.29  |
| 2813 | yan chi xian                       | Yes | 12.87 | 12.52 | 1.10  |
| 2814 | tong xin xian                      | Yes | 5.51  | 5.46  | 0.06  |
| 2815 | yuan zhou qu                       | Yes | 2.54  | 2.07  | 0.50  |
| 2816 | xi ji xian                         | Yes | 4.56  | 4.41  | 3.25  |
| 2817 | long de xian                       | Yes | 13.72 | 11.00 | 4.90  |
| 2818 | jing yuan xian                     | Yes | 47.06 | 46.54 | 5.73  |
| 2819 | peng yang xian                     | Yes | 1.59  | 1.43  | 0.31  |
| 2820 | hai yuan xian                      | Yes | 3.90  | 3.85  | 0.18  |
| 2821 | ba li kun ha sa ke zi zhi xian     | Yes | 2.34  | 0.00  | 2.34  |
| 2822 | wu shi xian                        | Yes | 2.94  | 0.00  | 2.94  |
| 2823 | ke ping xian                       | Yes | 0.00  | 0.00  | 0.00  |
| 2824 | a tu shi shi                       | Yes | 0.00  | 0.00  | 0.00  |
| 2825 | a ke tao xian                      | Yes | 5.55  | 5.15  | 0.44  |
| 2826 | a he qi xian                       | Yes | 0.79  | 0.00  | 0.79  |
| 2827 | wu qia xian                        | Yes | 0.65  | 0.02  | 0.63  |
| 2828 | ka shi shi                         | Yes | 0.00  | 0.00  | 0.00  |
| 2829 | shu fu xian                        | Yes | 0.00  | 0.00  | 0.00  |
| 2830 | shu le xian                        | Yes | 0.14  | 0.00  | 0.14  |

|      |                                       |     |       |       |       |
|------|---------------------------------------|-----|-------|-------|-------|
| 2831 | ying ji sha xian                      | Yes | 1.32  | 0.00  | 1.32  |
| 2832 | ze pu xian                            | Yes | 3.83  | 0.00  | 3.83  |
| 2833 | sha che xian                          | Yes | 1.08  | 0.00  | 1.08  |
| 2834 | ye cheng xian                         | Yes | 1.49  | 1.32  | 0.17  |
| 2835 | mai gai ti xian                       | Yes | 1.74  | 0.92  | 0.82  |
| 2836 | yue pu hu xian                        | Yes | 2.59  | 0.00  | 2.59  |
| 2837 | ga shi xian                           | Yes | 0.05  | 0.00  | 0.05  |
| 2838 | ba chu xian                           | Yes | 11.99 | 0.72  | 11.56 |
| 2839 | ta shi ku er gan ta ji ke zi zhi xian | Yes | 67.99 | 67.61 | 0.39  |
| 2840 | he tian shi                           | Yes | 0.00  | 0.00  | 0.00  |
| 2841 | he tian xian                          | Yes | 0.13  | 0.13  | 0.00  |
| 2842 | mo yu xian                            | Yes | 0.53  | 0.00  | 0.53  |
| 2843 | pi shan xian                          | Yes | 0.00  | 0.00  | 0.00  |
| 2844 | luo pu xian                           | Yes | 0.07  | 0.00  | 0.07  |
| 2845 | ce le xian                            | Yes | 0.06  | 0.00  | 0.05  |
| 2846 | yu tian xian                          | Yes | 3.66  | 0.00  | 3.66  |
| 2847 | min feng xian                         | Yes | 1.29  | 0.20  | 1.09  |
| 2848 | cha bu cha er xi bo zi zhi xian       | Yes | 6.49  | 0.85  | 6.45  |
| 2849 | ni le ke xian                         | Yes | 6.99  | 0.54  | 6.80  |
| 2850 | tuo li xian                           | Yes | 1.14  | 0.70  | 0.91  |
| 2851 | qing he xian                          | Yes | 19.93 | 16.57 | 3.47  |
| 2852 | ji mu nai xian                        | Yes | 1.89  | 0.10  | 1.79  |
| 2853 | mang ya hang wei                      | Yes | 0.04  | 0.01  | 0.03  |
| 2854 | leng hu hang wei                      | Yes | 0.06  | 0.01  | 0.05  |
| 2855 | da chai dan hang wei                  | Yes | 0.00  | 0.00  | 0.00  |
